# Supplementary material for: G1/S cell cycle regulators mediate effects of circadian dysregulation on tumor growth and provide targets for timed anticancer treatment
Source: PLoS Biol. 2019 Apr 30;17(4):e3000228. doi: 10.1371/journal.pbio.3000228 (PMC6490878; doi:10.1371/journal.pbio.3000228)
Supplement: S2 Data — DE, differential expression. (XLSX) [file pbio.3000228.s027.xlsx]

## Sheet: Limma Voom DE analysis
id	geneSymbol	Comparison	DE_Method	logFC	AveExpr	DEG_pvalue	DEG_qvalue
ENSG00000214193	SH3D21	Control vs JetLag - all samples	LimmaVoom	1.7522	-1.3871	7.36977e-06	0.0897884
ENSG00000283632	EXOC3L2	Control vs JetLag - all samples	LimmaVoom	1.32571	0.286993	0.000819824	0.33668
ENSG00000108771	DHX58	Control vs JetLag - all samples	LimmaVoom	1.30627	0.385883	0.00014316	0.218252
ENSG00000102109	PCSK1N	Control vs JetLag - all samples	LimmaVoom	1.2675	2.32672	7.971e-05	0.206141
ENSG00000184160	ADRA2C	Control vs JetLag - all samples	LimmaVoom	1.26546	1.22565	0.000358312	0.28927
ENSG00000181234	TMEM132C	Control vs JetLag - all samples	LimmaVoom	1.25765	0.500833	0.000209663	0.246829
ENSG00000228350	CELSR3-AS1	Control vs JetLag - all samples	LimmaVoom	1.21766	-1.82425	0.00105197	0.355256
ENSG00000184916	JAG2	Control vs JetLag - all samples	LimmaVoom	1.20222	0.283843	0.000210295	0.246829
ENSG00000099822	HCN2	Control vs JetLag - all samples	LimmaVoom	1.18631	-0.905901	0.00184792	0.37003
ENSG00000095397	WHRN	Control vs JetLag - all samples	LimmaVoom	1.1836	-1.13636	0.00503183	0.421526
ENSG00000277459	AP001527.2	Control vs JetLag - all samples	LimmaVoom	1.16866	-0.306053	0.0012386	0.361136
ENSG00000223855	HRAT92	Control vs JetLag - all samples	LimmaVoom	1.16549	0.128694	0.00191373	0.37003
ENSG00000237803	LINC00211	Control vs JetLag - all samples	LimmaVoom	1.1361	-0.35958	0.00144325	0.361136
ENSG00000163795	ZNF513	Control vs JetLag - all samples	LimmaVoom	1.13511	-0.611353	0.00873522	0.460206
ENSG00000226026	AC092802.1	Control vs JetLag - all samples	LimmaVoom	1.1294	-1.46667	0.00190445	0.37003
ENSG00000220908	LINC02531	Control vs JetLag - all samples	LimmaVoom	1.11631	-1.40225	0.00415103	0.418145
ENSG00000159714	ZDHHC1	Control vs JetLag - all samples	LimmaVoom	1.11204	1.30948	0.00364794	0.406342
ENSG00000025708	TYMP	Control vs JetLag - all samples	LimmaVoom	1.10666	0.345528	0.00460731	0.418145
ENSG00000224109	CENPVL3	Control vs JetLag - all samples	LimmaVoom	1.10357	-0.448444	0.00258893	0.378125
ENSG00000164778	EN2	Control vs JetLag - all samples	LimmaVoom	1.09702	-1.46772	0.00541371	0.426446
ENSG00000164692	COL1A2	Control vs JetLag - all samples	LimmaVoom	1.09282	-1.72799	0.000902736	0.351011
ENSG00000178297	TMPRSS9	Control vs JetLag - all samples	LimmaVoom	1.08991	-1.84933	0.00111417	0.361136
ENSG00000078549	ADCYAP1R1	Control vs JetLag - all samples	LimmaVoom	1.08501	-0.423273	0.005654	0.426738
ENSG00000227953	LINC01341	Control vs JetLag - all samples	LimmaVoom	1.07479	-0.950356	0.00369559	0.409311
ENSG00000159387	IRX6	Control vs JetLag - all samples	LimmaVoom	1.06899	-0.504502	0.00352913	0.400589
ENSG00000239697	TNFSF12	Control vs JetLag - all samples	LimmaVoom	1.06774	-1.49472	0.00971861	0.48002
ENSG00000186377	CYP4X1	Control vs JetLag - all samples	LimmaVoom	1.0621	-0.799347	0.00538485	0.426009
ENSG00000257511	AC084824.1	Control vs JetLag - all samples	LimmaVoom	1.06099	-0.597148	0.00222619	0.373982
ENSG00000140459	CYP11A1	Control vs JetLag - all samples	LimmaVoom	1.05491	-0.791526	0.00908551	0.464289
ENSG00000175602	CCDC85B	Control vs JetLag - all samples	LimmaVoom	1.05332	4.39454	0.000184933	0.241403
ENSG00000204060	FOXO6	Control vs JetLag - all samples	LimmaVoom	1.04992	0.229505	0.00235522	0.375621
ENSG00000270878	AL136038.4	Control vs JetLag - all samples	LimmaVoom	1.04684	-1.0587	0.0124562	0.49811
ENSG00000188693	CYP51A1-AS1	Control vs JetLag - all samples	LimmaVoom	1.04545	-1.26699	0.00499044	0.421248
ENSG00000260766	AL513302.2	Control vs JetLag - all samples	LimmaVoom	1.03944	-0.577883	0.00560197	0.426738
ENSG00000255099	AC023245.2	Control vs JetLag - all samples	LimmaVoom	1.03789	-0.431696	0.00245416	0.378125
ENSG00000226754	AL606760.1	Control vs JetLag - all samples	LimmaVoom	1.02731	-0.218713	0.00122957	0.361136
ENSG00000142611	PRDM16	Control vs JetLag - all samples	LimmaVoom	1.01938	-2.01364	0.00147064	0.361136
ENSG00000188064	WNT7B	Control vs JetLag - all samples	LimmaVoom	1.01675	-1.76534	0.00326362	0.395735
ENSG00000205485	AC004980.1	Control vs JetLag - all samples	LimmaVoom	1.01655	-0.99091	0.0172339	0.53201
ENSG00000123500	COL10A1	Control vs JetLag - all samples	LimmaVoom	1.0139	-1.84113	0.00685744	0.439423
ENSG00000115596	WNT6	Control vs JetLag - all samples	LimmaVoom	1.00404	0.670386	0.00177845	0.37003
ENSG00000177839	PCDHB9	Control vs JetLag - all samples	LimmaVoom	1.00085	-0.0946659	0.00512425	0.423029
ENSG00000188396	TCTEX1D4	Control vs JetLag - all samples	LimmaVoom	0.998585	-1.11662	0.0130833	0.507153
ENSG00000183549	ACSM5	Control vs JetLag - all samples	LimmaVoom	0.994435	-0.926936	0.0106916	0.483657
ENSG00000183486	MX2	Control vs JetLag - all samples	LimmaVoom	0.993902	-0.11979	0.00272085	0.378125
ENSG00000143001	TMEM61	Control vs JetLag - all samples	LimmaVoom	0.98608	-1.66214	0.00858142	0.459338
ENSG00000179428	AC073072.1	Control vs JetLag - all samples	LimmaVoom	0.98058	-1.68104	0.00223812	0.373982
ENSG00000196453	ZNF777	Control vs JetLag - all samples	LimmaVoom	0.979113	-0.449054	0.00329094	0.395735
ENSG00000275966	AC110285.6	Control vs JetLag - all samples	LimmaVoom	0.966403	-0.455205	0.00910712	0.464289
ENSG00000171956	FOXB1	Control vs JetLag - all samples	LimmaVoom	0.951035	-1.67651	0.00952847	0.474476
ENSG00000166106	ADAMTS15	Control vs JetLag - all samples	LimmaVoom	0.95051	-0.27469	0.00352076	0.400589
ENSG00000124466	LYPD3	Control vs JetLag - all samples	LimmaVoom	0.950345	0.208577	0.00531028	0.423029
ENSG00000166924	NYAP1	Control vs JetLag - all samples	LimmaVoom	0.945943	-0.422592	0.0165497	0.524962
ENSG00000260352	AC092287.1	Control vs JetLag - all samples	LimmaVoom	0.945261	-2.24923	0.000273422	0.267816
ENSG00000273394	AC128687.2	Control vs JetLag - all samples	LimmaVoom	0.940112	-0.723752	0.0104596	0.483657
ENSG00000251604	LINC01385	Control vs JetLag - all samples	LimmaVoom	0.93836	-1.79503	0.00425383	0.418145
ENSG00000187650	VMAC	Control vs JetLag - all samples	LimmaVoom	0.934719	-0.0106095	0.00314522	0.395735
ENSG00000255199	GTF2IP11	Control vs JetLag - all samples	LimmaVoom	0.927028	-1.47574	0.019851	0.54447
ENSG00000235493	LINC01967	Control vs JetLag - all samples	LimmaVoom	0.925648	-2.00172	0.00339774	0.400589
ENSG00000158825	CDA	Control vs JetLag - all samples	LimmaVoom	0.922762	-0.916747	0.00554706	0.426738
ENSG00000050555	LAMC3	Control vs JetLag - all samples	LimmaVoom	0.920186	1.16527	0.000592726	0.309488
ENSG00000171954	CYP4F22	Control vs JetLag - all samples	LimmaVoom	0.918504	-0.584879	0.0110448	0.483657
ENSG00000165309	ARMC3	Control vs JetLag - all samples	LimmaVoom	0.915248	-1.02834	0.0154608	0.519172
ENSG00000237402	CAMTA1-IT1	Control vs JetLag - all samples	LimmaVoom	0.912554	-2.02636	0.00365764	0.406342
ENSG00000198597	ZNF536	Control vs JetLag - all samples	LimmaVoom	0.910962	-0.130557	0.00517631	0.423029
ENSG00000181885	CLDN7	Control vs JetLag - all samples	LimmaVoom	0.90505	-1.41817	0.0110689	0.483657
ENSG00000137809	ITGA11	Control vs JetLag - all samples	LimmaVoom	0.904174	-1.60827	0.0215047	0.552669
ENSG00000157368	IL34	Control vs JetLag - all samples	LimmaVoom	0.902316	-0.864207	0.0304482	0.584514
ENSG00000256304	CCDC150P1	Control vs JetLag - all samples	LimmaVoom	0.898989	-0.840114	0.0182107	0.536776
ENSG00000276603	AL109614.1	Control vs JetLag - all samples	LimmaVoom	0.896222	-1.13542	0.0588644	0.645518
ENSG00000180532	ZSCAN4	Control vs JetLag - all samples	LimmaVoom	0.893561	-2.0781	0.0157998	0.519172
ENSG00000260714	AC133552.1	Control vs JetLag - all samples	LimmaVoom	0.892199	-1.31732	0.00904454	0.463644
ENSG00000123689	G0S2	Control vs JetLag - all samples	LimmaVoom	0.892146	0.168899	0.00800067	0.448836
ENSG00000168961	LGALS9	Control vs JetLag - all samples	LimmaVoom	0.888792	-0.406539	0.00347066	0.400589
ENSG00000272033	AL136984.1	Control vs JetLag - all samples	LimmaVoom	0.888562	-1.08581	0.0195569	0.54447
ENSG00000260114	AC120114.2	Control vs JetLag - all samples	LimmaVoom	0.888368	-0.333163	0.013845	0.511112
ENSG00000260778	AC009065.4	Control vs JetLag - all samples	LimmaVoom	0.887111	-0.542688	0.016038	0.520594
ENSG00000215374	FAM66B	Control vs JetLag - all samples	LimmaVoom	0.886384	-0.586195	0.00466267	0.418145
ENSG00000066735	KIF26A	Control vs JetLag - all samples	LimmaVoom	0.886029	1.02631	0.0139832	0.512249
ENSG00000250251	PKD1P6	Control vs JetLag - all samples	LimmaVoom	0.885332	0.197558	0.00301779	0.394821
ENSG00000228280	AL731568.1	Control vs JetLag - all samples	LimmaVoom	0.883502	-1.89739	0.00745762	0.443254
ENSG00000267317	AC027307.2	Control vs JetLag - all samples	LimmaVoom	0.882791	0.956134	0.0111804	0.484751
ENSG00000180644	PRF1	Control vs JetLag - all samples	LimmaVoom	0.87028	0.00972515	0.0117217	0.491235
ENSG00000242419	PCDHGC4	Control vs JetLag - all samples	LimmaVoom	0.869865	-2.07239	0.00143075	0.361136
ENSG00000225205	AC078883.1	Control vs JetLag - all samples	LimmaVoom	0.869297	-1.57583	0.00811664	0.44949
ENSG00000141933	TPGS1	Control vs JetLag - all samples	LimmaVoom	0.869076	2.26759	0.0320046	0.585878
ENSG00000073150	PANX2	Control vs JetLag - all samples	LimmaVoom	0.868874	-1.25722	0.0132563	0.507547
ENSG00000224914	LINC00863	Control vs JetLag - all samples	LimmaVoom	0.868808	0.717285	0.00212696	0.373334
ENSG00000187122	SLIT1	Control vs JetLag - all samples	LimmaVoom	0.867996	-0.451468	0.0223097	0.553723
ENSG00000169856	ONECUT1	Control vs JetLag - all samples	LimmaVoom	0.866419	-1.97037	0.00615171	0.434063
ENSG00000107438	PDLIM1	Control vs JetLag - all samples	LimmaVoom	0.865986	-1.104	0.0210838	0.552411
ENSG00000272667	AC012306.2	Control vs JetLag - all samples	LimmaVoom	0.862592	0.0522337	0.0360478	0.595993
ENSG00000246465	AC138904.1	Control vs JetLag - all samples	LimmaVoom	0.862576	-0.124156	0.0155493	0.519172
ENSG00000185885	IFITM1	Control vs JetLag - all samples	LimmaVoom	0.862558	-1.17365	0.0370857	0.597222
ENSG00000218891	ZNF579	Control vs JetLag - all samples	LimmaVoom	0.862003	-0.0997829	0.0279193	0.576385
ENSG00000141965	FEM1A	Control vs JetLag - all samples	LimmaVoom	0.861288	0.307041	0.0129626	0.504662
ENSG00000131188	PRR7	Control vs JetLag - all samples	LimmaVoom	0.860916	1.93368	0.00472265	0.420427
ENSG00000107954	NEURL1	Control vs JetLag - all samples	LimmaVoom	0.860512	-0.329974	0.0216241	0.552669
ENSG00000179292	TMEM151A	Control vs JetLag - all samples	LimmaVoom	0.858826	-0.412659	0.0348622	0.592363
ENSG00000272807	AC007038.2	Control vs JetLag - all samples	LimmaVoom	0.858541	-2.12969	0.00239777	0.377132
ENSG00000170498	KISS1	Control vs JetLag - all samples	LimmaVoom	0.857164	2.15604	3.17872e-05	0.190008
ENSG00000257178	AC103702.1	Control vs JetLag - all samples	LimmaVoom	0.856093	-1.43179	0.028977	0.58103
ENSG00000225614	ZNF469	Control vs JetLag - all samples	LimmaVoom	0.854555	-1.23785	0.0158013	0.519172
ENSG00000167371	PRRT2	Control vs JetLag - all samples	LimmaVoom	0.854374	0.175708	0.0123941	0.49811
ENSG00000181588	MEX3D	Control vs JetLag - all samples	LimmaVoom	0.853623	3.61932	0.000379044	0.28927
ENSG00000204396	VWA7	Control vs JetLag - all samples	LimmaVoom	0.852681	-0.462607	0.011518	0.489818
ENSG00000282890	AC009975.1	Control vs JetLag - all samples	LimmaVoom	0.852576	-0.80361	0.0214379	0.552669
ENSG00000281706	LINC01012	Control vs JetLag - all samples	LimmaVoom	0.852256	-1.76374	0.0209299	0.551145
ENSG00000246225	AC006299.1	Control vs JetLag - all samples	LimmaVoom	0.850346	-2.18004	0.00320358	0.395735
ENSG00000187024	PTRH1	Control vs JetLag - all samples	LimmaVoom	0.84776	1.41744	0.000863579	0.34807
ENSG00000205959	AC105345.1	Control vs JetLag - all samples	LimmaVoom	0.845613	-1.09422	0.0240789	0.5614
ENSG00000214851	LINC00612	Control vs JetLag - all samples	LimmaVoom	0.844989	-0.691031	0.0194588	0.54447
ENSG00000273289	AL121672.3	Control vs JetLag - all samples	LimmaVoom	0.844896	-1.91075	0.0084837	0.458697
ENSG00000244486	SCARF2	Control vs JetLag - all samples	LimmaVoom	0.84425	3.48583	0.00184136	0.37003
ENSG00000137877	SPTBN5	Control vs JetLag - all samples	LimmaVoom	0.841472	-1.18358	0.028678	0.580719
ENSG00000100427	MLC1	Control vs JetLag - all samples	LimmaVoom	0.841108	-0.538344	0.0192929	0.54447
ENSG00000272304	AC096721.1	Control vs JetLag - all samples	LimmaVoom	0.840088	-1.94285	0.00621083	0.43469
ENSG00000269388	AC018755.3	Control vs JetLag - all samples	LimmaVoom	0.838395	-2.10351	0.0202669	0.547747
ENSG00000275793	RIMBP3	Control vs JetLag - all samples	LimmaVoom	0.837554	-1.26214	0.0341772	0.590034
ENSG00000144488	ESPNL	Control vs JetLag - all samples	LimmaVoom	0.836979	-0.985174	0.0318294	0.585878
ENSG00000116329	OPRD1	Control vs JetLag - all samples	LimmaVoom	0.836892	-1.3427	0.0228783	0.557097
ENSG00000128564	VGF	Control vs JetLag - all samples	LimmaVoom	0.835335	5.21207	0.000473309	0.296567
ENSG00000241547	ACTG1P20	Control vs JetLag - all samples	LimmaVoom	0.83513	-0.787238	0.00914937	0.464289
ENSG00000162894	FCMR	Control vs JetLag - all samples	LimmaVoom	0.833225	-1.97806	0.00316547	0.395735
ENSG00000173926	MARCH3	Control vs JetLag - all samples	LimmaVoom	0.832935	-0.273734	0.0167489	0.526373
ENSG00000272432	AL031432.3	Control vs JetLag - all samples	LimmaVoom	0.831825	-0.908816	0.0493021	0.629734
ENSG00000273230	AC102953.2	Control vs JetLag - all samples	LimmaVoom	0.831517	0.438594	0.0107353	0.483657
ENSG00000224209	LINC00466	Control vs JetLag - all samples	LimmaVoom	0.830513	-2.0268	0.00988446	0.480958
ENSG00000163631	ALB	Control vs JetLag - all samples	LimmaVoom	0.830352	0.693657	0.0125902	0.500509
ENSG00000261409	AL035425.3	Control vs JetLag - all samples	LimmaVoom	0.828725	-0.978742	0.0365672	0.596978
ENSG00000183248	PRR36	Control vs JetLag - all samples	LimmaVoom	0.828196	-1.58311	0.0119583	0.493484
ENSG00000189129	PLAC9	Control vs JetLag - all samples	LimmaVoom	0.822299	-0.147842	0.0272486	0.574164
ENSG00000233493	TMEM238	Control vs JetLag - all samples	LimmaVoom	0.82215	-0.984412	0.024408	0.561875
ENSG00000279294	AC092135.1	Control vs JetLag - all samples	LimmaVoom	0.821979	-2.47933	0.000780476	0.327866
ENSG00000142623	PADI1	Control vs JetLag - all samples	LimmaVoom	0.820565	0.677686	0.000730131	0.327866
ENSG00000131037	EPS8L1	Control vs JetLag - all samples	LimmaVoom	0.82048	0.72751	0.0350297	0.59315
ENSG00000102886	GDPD3	Control vs JetLag - all samples	LimmaVoom	0.819498	-1.6543	0.0237307	0.561206
ENSG00000055118	KCNH2	Control vs JetLag - all samples	LimmaVoom	0.817956	1.66202	0.00196404	0.37003
ENSG00000239389	PCDHA13	Control vs JetLag - all samples	LimmaVoom	0.81676	-0.411957	0.0332871	0.589309
ENSG00000198720	ANKRD13B	Control vs JetLag - all samples	LimmaVoom	0.816382	0.431863	0.0122954	0.49657
ENSG00000249345	LINC02405	Control vs JetLag - all samples	LimmaVoom	0.815839	-1.53123	0.043292	0.612588
ENSG00000166006	KCNC2	Control vs JetLag - all samples	LimmaVoom	0.815811	-1.19062	0.0271966	0.573924
ENSG00000089692	LAG3	Control vs JetLag - all samples	LimmaVoom	0.815806	-0.971586	0.0415228	0.609013
ENSG00000092758	COL9A3	Control vs JetLag - all samples	LimmaVoom	0.814556	-0.984911	0.0600232	0.649645
ENSG00000234742	AC144530.1	Control vs JetLag - all samples	LimmaVoom	0.814398	-2.34602	0.00214501	0.373334
ENSG00000204802	AL590399.1	Control vs JetLag - all samples	LimmaVoom	0.814065	-0.796527	0.0715385	0.665476
ENSG00000196456	ZNF775	Control vs JetLag - all samples	LimmaVoom	0.813451	-0.475101	0.0220491	0.552669
ENSG00000196844	PATE2	Control vs JetLag - all samples	LimmaVoom	0.812909	-2.19026	0.00453632	0.418145
ENSG00000113212	PCDHB7	Control vs JetLag - all samples	LimmaVoom	0.81261	-1.47989	0.0278032	0.576385
ENSG00000272677	AC124016.1	Control vs JetLag - all samples	LimmaVoom	0.812559	-0.859715	0.0266531	0.573131
ENSG00000204709	LINC01556	Control vs JetLag - all samples	LimmaVoom	0.812286	-1.85798	0.0171841	0.531818
ENSG00000186056	MATN1-AS1	Control vs JetLag - all samples	LimmaVoom	0.811521	1.14768	0.00343881	0.400589
ENSG00000179930	ZNF648	Control vs JetLag - all samples	LimmaVoom	0.807949	-2.12811	0.0266844	0.573131
ENSG00000261308	FIGNL2	Control vs JetLag - all samples	LimmaVoom	0.807006	-1.68587	0.0233324	0.559082
ENSG00000256971	LINC00508	Control vs JetLag - all samples	LimmaVoom	0.806626	-1.72605	0.0177888	0.535403
ENSG00000253395	AP003469.2	Control vs JetLag - all samples	LimmaVoom	0.805932	-2.20101	0.00495906	0.421248
ENSG00000233895	AL121761.1	Control vs JetLag - all samples	LimmaVoom	0.805787	-0.540212	0.0114083	0.489193
ENSG00000261542	AC011978.2	Control vs JetLag - all samples	LimmaVoom	0.803243	-0.847313	0.0206185	0.55048
ENSG00000166188	ZNF319	Control vs JetLag - all samples	LimmaVoom	0.802879	1.40201	0.0224885	0.554286
ENSG00000184809	B3GALT5-AS1	Control vs JetLag - all samples	LimmaVoom	0.802734	-1.19016	0.0233383	0.559082
ENSG00000262587	AC133552.2	Control vs JetLag - all samples	LimmaVoom	0.801937	-0.166822	0.0420989	0.611572
ENSG00000087589	CASS4	Control vs JetLag - all samples	LimmaVoom	0.801265	-0.53838	0.0137893	0.510936
ENSG00000228288	PCAT6	Control vs JetLag - all samples	LimmaVoom	0.800621	-2.13602	0.0140641	0.512249
ENSG00000275611	AL159153.1	Control vs JetLag - all samples	LimmaVoom	0.80041	-1.12743	0.0224428	0.554286
ENSG00000273760	AC245041.1	Control vs JetLag - all samples	LimmaVoom	0.797125	-0.700244	0.0551797	0.639043
ENSG00000115008	IL1A	Control vs JetLag - all samples	LimmaVoom	0.796832	-0.557565	0.0346369	0.592131
ENSG00000127903	ZNF835	Control vs JetLag - all samples	LimmaVoom	0.796582	0.493388	0.0179694	0.535631
ENSG00000225968	ELFN1	Control vs JetLag - all samples	LimmaVoom	0.796494	3.93199	0.000180073	0.241403
ENSG00000158731	OR10J6P	Control vs JetLag - all samples	LimmaVoom	0.79648	-1.82856	0.0166002	0.524962
ENSG00000236305	SLC12A9-AS1	Control vs JetLag - all samples	LimmaVoom	0.796086	-1.19416	0.0276738	0.576024
ENSG00000203737	GPR52	Control vs JetLag - all samples	LimmaVoom	0.795589	-2.00161	0.017001	0.527946
ENSG00000099625	CBARP	Control vs JetLag - all samples	LimmaVoom	0.795152	0.0941472	0.00713789	0.440206
ENSG00000268996	MAN1B1-AS1	Control vs JetLag - all samples	LimmaVoom	0.793677	0.47302	0.00918528	0.464289
ENSG00000151006	PRSS53	Control vs JetLag - all samples	LimmaVoom	0.793552	-1.09912	0.0572295	0.642623
ENSG00000243449	C4orf48	Control vs JetLag - all samples	LimmaVoom	0.792634	1.79875	0.00441236	0.418145
ENSG00000258279	LINC00592	Control vs JetLag - all samples	LimmaVoom	0.792569	-2.33401	0.00160203	0.37003
ENSG00000266473	AC007448.3	Control vs JetLag - all samples	LimmaVoom	0.792339	-1.63379	0.0284457	0.578977
ENSG00000180592	SKIDA1	Control vs JetLag - all samples	LimmaVoom	0.790918	-0.476479	0.00711217	0.440206
ENSG00000253633	AP002852.2	Control vs JetLag - all samples	LimmaVoom	0.789769	-1.59357	0.0229069	0.557395
ENSG00000204103	MAFB	Control vs JetLag - all samples	LimmaVoom	0.789588	-1.57434	0.028035	0.576486
ENSG00000111305	GSG1	Control vs JetLag - all samples	LimmaVoom	0.789455	-1.11739	0.0581344	0.644526
ENSG00000102935	ZNF423	Control vs JetLag - all samples	LimmaVoom	0.789241	-0.373087	0.00506292	0.421526
ENSG00000250934	AC016924.1	Control vs JetLag - all samples	LimmaVoom	0.787926	-2.26762	0.0125216	0.499087
ENSG00000267421	AC005498.2	Control vs JetLag - all samples	LimmaVoom	0.787228	-0.671155	0.0292759	0.581225
ENSG00000236297	AC048351.1	Control vs JetLag - all samples	LimmaVoom	0.787036	-1.62335	0.0232415	0.559082
ENSG00000198870	STKLD1	Control vs JetLag - all samples	LimmaVoom	0.786422	-0.203853	0.0124546	0.49811
ENSG00000186564	FOXD2	Control vs JetLag - all samples	LimmaVoom	0.786263	1.01888	0.0197529	0.54447
ENSG00000278768	BACE1-AS	Control vs JetLag - all samples	LimmaVoom	0.783054	-2.35277	0.00267249	0.378125
ENSG00000169750	RAC3	Control vs JetLag - all samples	LimmaVoom	0.781875	-1.0696	0.0199167	0.54447
ENSG00000197565	COL4A6	Control vs JetLag - all samples	LimmaVoom	0.781657	0.556154	0.00452799	0.418145
ENSG00000259917	HNRNPLP2	Control vs JetLag - all samples	LimmaVoom	0.781217	0.194053	0.019269	0.54447
ENSG00000223776	LGALS8-AS1	Control vs JetLag - all samples	LimmaVoom	0.780179	-0.414106	0.0307605	0.585011
ENSG00000166507	NDST2	Control vs JetLag - all samples	LimmaVoom	0.77755	0.893941	0.00803463	0.448836
ENSG00000020633	RUNX3	Control vs JetLag - all samples	LimmaVoom	0.776034	-1.05907	0.0247147	0.561875
ENSG00000130294	KIF1A	Control vs JetLag - all samples	LimmaVoom	0.77515	0.926325	0.00380389	0.409311
ENSG00000250803	AC010255.3	Control vs JetLag - all samples	LimmaVoom	0.773752	-1.71463	0.0669472	0.657134
ENSG00000069011	PITX1	Control vs JetLag - all samples	LimmaVoom	0.773101	2.08398	0.00919685	0.464289
ENSG00000229656	AL365203.1	Control vs JetLag - all samples	LimmaVoom	0.772578	-2.11774	0.0133811	0.508526
ENSG00000259459	AC087525.1	Control vs JetLag - all samples	LimmaVoom	0.772419	-1.86305	0.0274816	0.575083
ENSG00000136378	ADAMTS7	Control vs JetLag - all samples	LimmaVoom	0.771238	-0.111423	0.0639893	0.653931
ENSG00000233527	ZNF529-AS1	Control vs JetLag - all samples	LimmaVoom	0.769651	1.12354	0.00695994	0.439423
ENSG00000177045	SIX5	Control vs JetLag - all samples	LimmaVoom	0.769135	1.37545	0.00437374	0.418145
ENSG00000214248	AC010336.1	Control vs JetLag - all samples	LimmaVoom	0.767957	0.0328315	0.0197869	0.54447
ENSG00000185666	SYN3	Control vs JetLag - all samples	LimmaVoom	0.767875	-0.744096	0.0344023	0.590034
ENSG00000257556	LINC02298	Control vs JetLag - all samples	LimmaVoom	0.765255	-0.98876	0.0432224	0.612588
ENSG00000183250	LINC01547	Control vs JetLag - all samples	LimmaVoom	0.764548	1.5765	0.0100704	0.482401
ENSG00000155980	KIF5A	Control vs JetLag - all samples	LimmaVoom	0.763879	0.250569	0.0160826	0.521172
ENSG00000131409	LRRC4B	Control vs JetLag - all samples	LimmaVoom	0.76372	2.98479	0.00388781	0.410692
ENSG00000223559	AC073136.1	Control vs JetLag - all samples	LimmaVoom	0.762674	-1.02966	0.0377866	0.598657
ENSG00000204991	SPIRE2	Control vs JetLag - all samples	LimmaVoom	0.762659	1.22272	0.0115881	0.489818
ENSG00000148482	SLC39A12	Control vs JetLag - all samples	LimmaVoom	0.762482	-1.02457	0.0380617	0.599525
ENSG00000236829	Z97634.1	Control vs JetLag - all samples	LimmaVoom	0.762191	-0.995038	0.0460932	0.622252
ENSG00000158427	TMSB15B	Control vs JetLag - all samples	LimmaVoom	0.761586	-1.08453	0.017316	0.532346
ENSG00000276116	FUT8-AS1	Control vs JetLag - all samples	LimmaVoom	0.761383	0.477702	0.0109624	0.483657
ENSG00000267530	LINC01836	Control vs JetLag - all samples	LimmaVoom	0.76132	-0.848535	0.0959217	0.693701
ENSG00000279161	AC093503.3	Control vs JetLag - all samples	LimmaVoom	0.761058	-1.15711	0.0347374	0.592363
ENSG00000213638	ADAT3	Control vs JetLag - all samples	LimmaVoom	0.760793	-1.52873	0.0307829	0.585011
ENSG00000167984	NLRC3	Control vs JetLag - all samples	LimmaVoom	0.760321	-1.35178	0.0190987	0.54447
ENSG00000135577	NMBR	Control vs JetLag - all samples	LimmaVoom	0.760014	-2.23991	0.00669992	0.438646
ENSG00000179796	LRRC3B	Control vs JetLag - all samples	LimmaVoom	0.75936	-0.281404	0.0411433	0.607756
ENSG00000227398	KIF9-AS1	Control vs JetLag - all samples	LimmaVoom	0.759058	0.492831	0.027375	0.575033
ENSG00000275198	AL512791.2	Control vs JetLag - all samples	LimmaVoom	0.757645	-0.663562	0.0529694	0.634969
ENSG00000135697	BCO1	Control vs JetLag - all samples	LimmaVoom	0.757563	-0.908496	0.0609514	0.651421
ENSG00000255121	AP003392.4	Control vs JetLag - all samples	LimmaVoom	0.756947	-0.33067	0.0135263	0.51093
ENSG00000273568	AC131009.3	Control vs JetLag - all samples	LimmaVoom	0.754742	-1.80726	0.0257382	0.566365
ENSG00000268670	AC016586.1	Control vs JetLag - all samples	LimmaVoom	0.754582	-0.960479	0.0301228	0.584514
ENSG00000283154	IQCJ-SCHIP1	Control vs JetLag - all samples	LimmaVoom	0.754105	1.72647	0.000222855	0.246829
ENSG00000116396	KCNC4	Control vs JetLag - all samples	LimmaVoom	0.754033	1.71653	0.022152	0.552669
ENSG00000088538	DOCK3	Control vs JetLag - all samples	LimmaVoom	0.753944	0.96097	0.0177061	0.533958
ENSG00000172687	ZNF738	Control vs JetLag - all samples	LimmaVoom	0.753214	1.1267	0.019707	0.54447
ENSG00000142621	FHAD1	Control vs JetLag - all samples	LimmaVoom	0.752319	-1.40533	0.0268755	0.573151
ENSG00000249156	AC233724.6	Control vs JetLag - all samples	LimmaVoom	0.752266	-0.640959	0.0749768	0.668775
ENSG00000204711	C9orf135	Control vs JetLag - all samples	LimmaVoom	0.752256	-0.176921	0.0167379	0.526373
ENSG00000168477	TNXB	Control vs JetLag - all samples	LimmaVoom	0.751157	-0.383588	0.0302123	0.584514
ENSG00000183092	BEGAIN	Control vs JetLag - all samples	LimmaVoom	0.750237	1.41543	0.0116189	0.489818
ENSG00000229917	RPL7P46	Control vs JetLag - all samples	LimmaVoom	0.750039	-2.37826	0.0111111	0.483657
ENSG00000112139	MDGA1	Control vs JetLag - all samples	LimmaVoom	0.749164	0.783194	0.00376538	0.409311
ENSG00000250506	CDK3	Control vs JetLag - all samples	LimmaVoom	0.749159	-0.27394	0.0261357	0.569796
ENSG00000123329	ARHGAP9	Control vs JetLag - all samples	LimmaVoom	0.749095	-2.30555	0.0041803	0.418145
ENSG00000272505	AC104964.3	Control vs JetLag - all samples	LimmaVoom	0.748882	-1.76828	0.0475068	0.626128
ENSG00000115507	OTX1	Control vs JetLag - all samples	LimmaVoom	0.74759	-0.704257	0.019322	0.54447
ENSG00000163040	CCDC74A	Control vs JetLag - all samples	LimmaVoom	0.746283	1.74826	0.0102583	0.483657
ENSG00000276408	AC025287.2	Control vs JetLag - all samples	LimmaVoom	0.746228	-0.663498	0.0458731	0.622025
ENSG00000178951	ZBTB7A	Control vs JetLag - all samples	LimmaVoom	0.744687	1.53364	0.00528265	0.423029
ENSG00000127084	FGD3	Control vs JetLag - all samples	LimmaVoom	0.744407	0.540737	0.0106285	0.483657
ENSG00000235034	C19orf81	Control vs JetLag - all samples	LimmaVoom	0.744343	0.6792	0.0324353	0.586713
ENSG00000198816	ZNF358	Control vs JetLag - all samples	LimmaVoom	0.743407	2.63025	0.00258546	0.378125
ENSG00000104951	IL4I1	Control vs JetLag - all samples	LimmaVoom	0.742971	-1.37767	0.0380041	0.599332
ENSG00000187730	GABRD	Control vs JetLag - all samples	LimmaVoom	0.742583	0.0098258	0.0215729	0.552669
ENSG00000196126	HLA-DRB1	Control vs JetLag - all samples	LimmaVoom	0.742259	0.861447	0.00944225	0.472113
ENSG00000176136	MC5R	Control vs JetLag - all samples	LimmaVoom	0.741646	-2.13143	0.0122674	0.496057
ENSG00000196700	ZNF512B	Control vs JetLag - all samples	LimmaVoom	0.740939	1.32975	0.0172842	0.532346
ENSG00000272071	AC122710.3	Control vs JetLag - all samples	LimmaVoom	0.740813	-1.83811	0.0258308	0.567353
ENSG00000265015	AP005901.3	Control vs JetLag - all samples	LimmaVoom	0.740134	-1.73091	0.0302038	0.584514
ENSG00000273183	AC093726.2	Control vs JetLag - all samples	LimmaVoom	0.738682	-2.45731	0.00115927	0.361136
ENSG00000182791	CCDC87	Control vs JetLag - all samples	LimmaVoom	0.738495	0.24627	0.0441514	0.615612
ENSG00000173013	CCDC96	Control vs JetLag - all samples	LimmaVoom	0.737576	-0.634984	0.0621782	0.651959
c	CCL5	Control vs JetLag - all samples	LimmaVoom	0.736811	-1.18663	0.0716987	0.665476
ENSG00000079385	CEACAM1	Control vs JetLag - all samples	LimmaVoom	0.734508	-0.519904	0.0378405	0.59899
ENSG00000110848	CD69	Control vs JetLag - all samples	LimmaVoom	0.73406	-1.58402	0.0205875	0.550052
ENSG00000104892	KLC3	Control vs JetLag - all samples	LimmaVoom	0.733945	1.47825	0.0243544	0.561875
ENSG00000072858	SIDT1	Control vs JetLag - all samples	LimmaVoom	0.733617	-2.38999	0.00528688	0.423029
ENSG00000164400	CSF2	Control vs JetLag - all samples	LimmaVoom	0.732586	-0.187984	0.0457957	0.622025
ENSG00000231752	EMBP1	Control vs JetLag - all samples	LimmaVoom	0.732431	-0.638999	0.0561918	0.642309
ENSG00000130590	SAMD10	Control vs JetLag - all samples	LimmaVoom	0.731227	-0.862911	0.047445	0.625913
ENSG00000172780	RAB43	Control vs JetLag - all samples	LimmaVoom	0.730524	0.241983	0.0319323	0.585878
ENSG00000264015	AC124254.1	Control vs JetLag - all samples	LimmaVoom	0.728744	-0.0165462	0.0129768	0.504662
ENSG00000138395	CDK15	Control vs JetLag - all samples	LimmaVoom	0.728514	-0.654393	0.0401376	0.603716
ENSG00000063127	SLC6A16	Control vs JetLag - all samples	LimmaVoom	0.728338	0.714868	0.066598	0.656993
ENSG00000272523	LINC01023	Control vs JetLag - all samples	LimmaVoom	0.727724	0.634804	0.00329148	0.395735
ENSG00000261342	AC006538.1	Control vs JetLag - all samples	LimmaVoom	0.727664	-0.091012	0.0336217	0.589901
ENSG00000158716	DUSP23	Control vs JetLag - all samples	LimmaVoom	0.726887	-2.14396	0.0185254	0.539094
ENSG00000197536	C5orf56	Control vs JetLag - all samples	LimmaVoom	0.72596	-0.471452	0.0530515	0.634969
ENSG00000180066	C10orf91	Control vs JetLag - all samples	LimmaVoom	0.725922	-2.27591	0.0102327	0.483657
ENSG00000275784	AL034549.1	Control vs JetLag - all samples	LimmaVoom	0.72497	-1.70979	0.0503142	0.63047
ENSG00000254681	PKD1P5	Control vs JetLag - all samples	LimmaVoom	0.724834	-1.79457	0.0467936	0.623289
ENSG00000167525	PROCA1	Control vs JetLag - all samples	LimmaVoom	0.724678	-0.161864	0.0728055	0.667597
ENSG00000272854	AC004839.1	Control vs JetLag - all samples	LimmaVoom	0.72452	-1.81358	0.010801	0.483657
ENSG00000213901	SLC23A3	Control vs JetLag - all samples	LimmaVoom	0.724218	-0.914484	0.0385164	0.600557
ENSG00000242697	RPL5P12	Control vs JetLag - all samples	LimmaVoom	0.723708	-1.75196	0.0312025	0.585269
ENSG00000260018	AC040169.1	Control vs JetLag - all samples	LimmaVoom	0.723376	0.430031	0.0121411	0.49447
ENSG00000124507	PACSIN1	Control vs JetLag - all samples	LimmaVoom	0.722532	-1.75467	0.0456471	0.622025
ENSG00000189120	SP6	Control vs JetLag - all samples	LimmaVoom	0.722524	0.952927	0.0131871	0.507547
ENSG00000247950	SEC24B-AS1	Control vs JetLag - all samples	LimmaVoom	0.722325	-0.181575	0.0295083	0.58362
ENSG00000244242	IFITM10	Control vs JetLag - all samples	LimmaVoom	0.722057	-1.42327	0.0089097	0.460944
ENSG00000128011	LRFN1	Control vs JetLag - all samples	LimmaVoom	0.72197	-0.652122	0.039621	0.602475
ENSG00000237499	AL357060.2	Control vs JetLag - all samples	LimmaVoom	0.72157	-0.124541	0.0173559	0.532346
ENSG00000162374	ELAVL4	Control vs JetLag - all samples	LimmaVoom	0.720999	-1.11313	0.0829122	0.681213
ENSG00000160282	FTCD	Control vs JetLag - all samples	LimmaVoom	0.720617	-1.62998	0.0486679	0.627616
ENSG00000271798	SNORA51	Control vs JetLag - all samples	LimmaVoom	0.719938	-2.0849	0.0322131	0.586184
ENSG00000260007	AC107871.1	Control vs JetLag - all samples	LimmaVoom	0.719796	-0.395884	0.0282873	0.57792
ENSG00000228274	AL021707.2	Control vs JetLag - all samples	LimmaVoom	0.719624	0.441398	0.0132754	0.507547
ENSG00000201343	Y_RNA	Control vs JetLag - all samples	LimmaVoom	0.719259	-2.46	0.00446841	0.418145
ENSG00000281571	AC241585.3	Control vs JetLag - all samples	LimmaVoom	0.719077	-0.567502	0.0846697	0.682116
ENSG00000273366	Z83851.2	Control vs JetLag - all samples	LimmaVoom	0.718494	-2.03496	0.0196222	0.54447
ENSG00000080854	IGSF9B	Control vs JetLag - all samples	LimmaVoom	0.718242	-0.0768788	0.0414402	0.608533
ENSG00000271013	LRRC37A9P	Control vs JetLag - all samples	LimmaVoom	0.718171	-1.13829	0.0485316	0.627475
ENSG00000206120	EGFEM1P	Control vs JetLag - all samples	LimmaVoom	0.717715	-1.92921	0.0308599	0.585011
ENSG00000272968	RBAK-RBAKDN	Control vs JetLag - all samples	LimmaVoom	0.717374	-2.40211	0.0222488	0.553192
ENSG00000170122	FOXD4	Control vs JetLag - all samples	LimmaVoom	0.717244	-1.75902	0.0494782	0.629734
ENSG00000241889	AC079944.2	Control vs JetLag - all samples	LimmaVoom	0.717239	-1.78274	0.0573592	0.643289
ENSG00000166816	LDHD	Control vs JetLag - all samples	LimmaVoom	0.717217	-0.549414	0.057207	0.642623
ENSG00000213801	ZNF321P	Control vs JetLag - all samples	LimmaVoom	0.716434	-1.46526	0.0435217	0.612826
ENSG00000256433	AC005840.3	Control vs JetLag - all samples	LimmaVoom	0.716304	-0.3876	0.0667641	0.657134
ENSG00000152315	KCNK13	Control vs JetLag - all samples	LimmaVoom	0.716203	0.711551	0.0104053	0.483657
ENSG00000261655	AC100803.2	Control vs JetLag - all samples	LimmaVoom	0.712964	-1.02962	0.092512	0.689024
ENSG00000130037	KCNA5	Control vs JetLag - all samples	LimmaVoom	0.712546	0.30146	0.012762	0.501935
ENSG00000223723	BX842568.2	Control vs JetLag - all samples	LimmaVoom	0.712065	-1.22131	0.0527984	0.634969
ENSG00000167173	C15orf39	Control vs JetLag - all samples	LimmaVoom	0.711699	1.33776	0.0330069	0.589309
ENSG00000168267	PTF1A	Control vs JetLag - all samples	LimmaVoom	0.711657	-0.723014	0.0532161	0.634969
ENSG00000130748	TMEM160	Control vs JetLag - all samples	LimmaVoom	0.711406	2.98632	0.00340728	0.400589
ENSG00000273341	AC004921.1	Control vs JetLag - all samples	LimmaVoom	0.710115	-2.33169	0.00327431	0.395735
ENSG00000205181	LINC00654	Control vs JetLag - all samples	LimmaVoom	0.709497	-1.9987	0.0340947	0.590034
ENSG00000104880	ARHGEF18	Control vs JetLag - all samples	LimmaVoom	0.707579	0.827714	0.0270867	0.573924
ENSG00000160801	PTH1R	Control vs JetLag - all samples	LimmaVoom	0.707268	-1.58454	0.0481321	0.626968
ENSG00000230832	AC241584.1	Control vs JetLag - all samples	LimmaVoom	0.707189	-2.32122	0.00561504	0.426738
ENSG00000138080	EMILIN1	Control vs JetLag - all samples	LimmaVoom	0.70686	2.30543	0.00226741	0.373982
ENSG00000273000	AP000347.2	Control vs JetLag - all samples	LimmaVoom	0.706531	-1.27013	0.0705624	0.663189
ENSG00000185052	SLC24A3	Control vs JetLag - all samples	LimmaVoom	0.706306	1.41878	0.0366681	0.597038
ENSG00000176177	ENTHD1	Control vs JetLag - all samples	LimmaVoom	0.706234	-1.4081	0.062107	0.651959
ENSG00000262050	AC005696.1	Control vs JetLag - all samples	LimmaVoom	0.705314	-0.431972	0.0551182	0.638925
ENSG00000160396	HIPK4	Control vs JetLag - all samples	LimmaVoom	0.704981	-1.38123	0.0383961	0.600557
ENSG00000105137	SYDE1	Control vs JetLag - all samples	LimmaVoom	0.703587	4.13134	0.000104122	0.218252
ENSG00000257038	AP002761.3	Control vs JetLag - all samples	LimmaVoom	0.703416	-1.4831	0.0574518	0.643368
ENSG00000214514	KRT42P	Control vs JetLag - all samples	LimmaVoom	0.703264	-1.30457	0.044581	0.619087
ENSG00000237424	FOXD2-AS1	Control vs JetLag - all samples	LimmaVoom	0.703194	1.2381	0.0252937	0.562871
ENSG00000253304	TMEM200B	Control vs JetLag - all samples	LimmaVoom	0.70221	-0.715909	0.0623642	0.651959
ENSG00000272736	AC005323.2	Control vs JetLag - all samples	LimmaVoom	0.701228	-1.28292	0.0816344	0.67768
ENSG00000267213	AC007773.1	Control vs JetLag - all samples	LimmaVoom	0.700588	1.38352	0.00583504	0.429954
ENSG00000158008	EXTL1	Control vs JetLag - all samples	LimmaVoom	0.700484	0.423089	0.0201208	0.546612
ENSG00000215086	NPM1P24	Control vs JetLag - all samples	LimmaVoom	0.698843	-1.88459	0.0301416	0.584514
ENSG00000232160	RAP2C-AS1	Control vs JetLag - all samples	LimmaVoom	0.698661	-0.530495	0.0835252	0.682116
ENSG00000168140	VASN	Control vs JetLag - all samples	LimmaVoom	0.698131	3.59291	0.00132653	0.361136
ENSG00000131094	C1QL1	Control vs JetLag - all samples	LimmaVoom	0.697923	4.9739	6.10975e-06	0.0897884
ENSG00000154146	NRGN	Control vs JetLag - all samples	LimmaVoom	0.697915	-0.422819	0.0669932	0.657342
ENSG00000177669	MBOAT4	Control vs JetLag - all samples	LimmaVoom	0.697009	-2.22497	0.0562366	0.642309
ENSG00000259172	AC023024.1	Control vs JetLag - all samples	LimmaVoom	0.69659	-0.723602	0.073743	0.668775
ENSG00000258297	AP001157.1	Control vs JetLag - all samples	LimmaVoom	0.696574	1.18219	0.0218302	0.552669
ENSG00000272862	AC106052.1	Control vs JetLag - all samples	LimmaVoom	0.695484	-1.71099	0.0677669	0.659504
ENSG00000075035	WSCD2	Control vs JetLag - all samples	LimmaVoom	0.69542	-1.10832	0.0645032	0.654456
ENSG00000161180	CCDC116	Control vs JetLag - all samples	LimmaVoom	0.694412	-2.17291	0.015955	0.520199
ENSG00000168079	SCARA5	Control vs JetLag - all samples	LimmaVoom	0.694274	-1.23297	0.06181	0.651959
ENSG00000100122	CRYBB1	Control vs JetLag - all samples	LimmaVoom	0.693571	1.10133	0.0362241	0.595993
ENSG00000228242	AC093495.1	Control vs JetLag - all samples	LimmaVoom	0.693165	-0.809417	0.0545637	0.637196
ENSG00000223727	AC034195.1	Control vs JetLag - all samples	LimmaVoom	0.693064	-2.18639	0.025122	0.562871
ENSG00000136099	PCDH8	Control vs JetLag - all samples	LimmaVoom	0.693013	0.177456	0.0320919	0.585878
ENSG00000267577	AC010327.3	Control vs JetLag - all samples	LimmaVoom	0.692974	-2.18699	0.00554353	0.426738
ENSG00000221883	ARIH2OS	Control vs JetLag - all samples	LimmaVoom	0.692641	1.21739	0.004063	0.418145
ENSG00000272221	AL645933.2	Control vs JetLag - all samples	LimmaVoom	0.692375	1.05177	0.030399	0.584514
ENSG00000179588	ZFPM1	Control vs JetLag - all samples	LimmaVoom	0.692321	0.173434	0.0329802	0.589309
ENSG00000166897	ELFN2	Control vs JetLag - all samples	LimmaVoom	0.692244	1.80686	0.0168528	0.526713
ENSG00000005102	MEOX1	Control vs JetLag - all samples	LimmaVoom	0.691983	-1.94378	0.0332558	0.589309
ENSG00000152128	TMEM163	Control vs JetLag - all samples	LimmaVoom	0.69164	-0.153332	0.0375329	0.598007
ENSG00000256745	AP002784.2	Control vs JetLag - all samples	LimmaVoom	0.691211	-1.9839	0.0255872	0.565082
ENSG00000182324	KCNJ14	Control vs JetLag - all samples	LimmaVoom	0.690933	-0.563198	0.0504625	0.630505
ENSG00000158571	PFKFB1	Control vs JetLag - all samples	LimmaVoom	0.69091	-1.08171	0.0758183	0.669918
ENSG00000103226	NOMO3	Control vs JetLag - all samples	LimmaVoom	0.690078	1.28666	0.034875	0.592363
ENSG00000280311	AC131212.4	Control vs JetLag - all samples	LimmaVoom	0.689988	-2.2907	0.0219499	0.552669
ENSG00000237525	AC012668.3	Control vs JetLag - all samples	LimmaVoom	0.689875	-1.59453	0.0607338	0.651356
ENSG00000167487	KLHL26	Control vs JetLag - all samples	LimmaVoom	0.689362	-1.4492	0.0906804	0.686489
ENSG00000171813	PWWP2B	Control vs JetLag - all samples	LimmaVoom	0.689335	2.32582	0.00557661	0.426738
ENSG00000182379	NXPH4	Control vs JetLag - all samples	LimmaVoom	0.6891	-0.163798	0.0425484	0.611904
ENSG00000272702	AC010913.1	Control vs JetLag - all samples	LimmaVoom	0.689045	1.01101	0.00424996	0.418145
ENSG00000236138	DUX4L26	Control vs JetLag - all samples	LimmaVoom	0.687656	0.608881	0.0178532	0.535631
ENSG00000232098	AC012313.1	Control vs JetLag - all samples	LimmaVoom	0.687435	0.671906	0.00465128	0.418145
ENSG00000259775	AL138976.2	Control vs JetLag - all samples	LimmaVoom	0.686875	-0.645764	0.0608497	0.651421
ENSG00000275964	AL355001.2	Control vs JetLag - all samples	LimmaVoom	0.686379	1.7668	0.00349973	0.400589
ENSG00000234383	CTBP2P8	Control vs JetLag - all samples	LimmaVoom	0.686083	-1.83374	0.0446748	0.619361
ENSG00000207751	MIR130B	Control vs JetLag - all samples	LimmaVoom	0.685465	-1.63347	0.0794605	0.672919
ENSG00000168135	KCNJ4	Control vs JetLag - all samples	LimmaVoom	0.68531	-1.15057	0.0568156	0.642623
ENSG00000066056	TIE1	Control vs JetLag - all samples	LimmaVoom	0.685237	-2.12661	0.042453	0.611904
ENSG00000215014	AL645728.1	Control vs JetLag - all samples	LimmaVoom	0.685136	1.37351	0.0016697	0.37003
ENSG00000261578	AP003119.3	Control vs JetLag - all samples	LimmaVoom	0.685038	-1.62408	0.0483818	0.627208
ENSG00000099814	CEP170B	Control vs JetLag - all samples	LimmaVoom	0.684948	2.34946	0.00185694	0.37003
ENSG00000183889	AC138969.1	Control vs JetLag - all samples	LimmaVoom	0.684154	-2.07536	0.033062	0.589309
ENSG00000234776	C11orf94	Control vs JetLag - all samples	LimmaVoom	0.683937	-1.62798	0.0664589	0.656683
ENSG00000259946	BX005019.1	Control vs JetLag - all samples	LimmaVoom	0.683778	-2.59678	0.00332873	0.398902
ENSG00000225345	SNX18P3	Control vs JetLag - all samples	LimmaVoom	0.683488	-1.36213	0.052915	0.634969
ENSG00000119669	IRF2BPL	Control vs JetLag - all samples	LimmaVoom	0.682013	6.33675	6.25106e-05	0.190008
ENSG00000135604	STX11	Control vs JetLag - all samples	LimmaVoom	0.681602	-1.4681	0.080565	0.675289
ENSG00000197744	PTMAP2	Control vs JetLag - all samples	LimmaVoom	0.681249	-0.095997	0.0575882	0.643368
ENSG00000280828	AC090114.3	Control vs JetLag - all samples	LimmaVoom	0.681024	-1.78658	0.0673808	0.658608
ENSG00000260063	AL512408.1	Control vs JetLag - all samples	LimmaVoom	0.680881	-0.688969	0.0460941	0.622252
ENSG00000268758	ADGRE4P	Control vs JetLag - all samples	LimmaVoom	0.680805	-1.54316	0.0619714	0.651959
ENSG00000273619	AL121832.2	Control vs JetLag - all samples	LimmaVoom	0.680805	1.92403	0.035662	0.595191
ENSG00000184185	KCNJ12	Control vs JetLag - all samples	LimmaVoom	0.680791	-1.36016	0.101919	0.700108
ENSG00000172014	ANKRD20A4	Control vs JetLag - all samples	LimmaVoom	0.680751	-1.67661	0.048293	0.627133
ENSG00000176387	HSD11B2	Control vs JetLag - all samples	LimmaVoom	0.680527	-1.74976	0.0648989	0.655359
ENSG00000063169	BICRA	Control vs JetLag - all samples	LimmaVoom	0.680493	0.611125	0.0311944	0.585269
ENSG00000203684	IBA57-AS1	Control vs JetLag - all samples	LimmaVoom	0.678798	-1.74576	0.0423945	0.611904
ENSG00000263327	TAPT1-AS1	Control vs JetLag - all samples	LimmaVoom	0.678242	-2.10471	0.033442	0.589309
ENSG00000081818	PCDHB4	Control vs JetLag - all samples	LimmaVoom	0.678165	-0.256495	0.0556302	0.640502
ENSG00000177508	IRX3	Control vs JetLag - all samples	LimmaVoom	0.677807	2.71011	0.000110586	0.218252
ENSG00000181798	LINC00471	Control vs JetLag - all samples	LimmaVoom	0.677408	-0.664446	0.0734537	0.668775
ENSG00000246922	UBAP1L	Control vs JetLag - all samples	LimmaVoom	0.677303	0.337726	0.0623107	0.651959
ENSG00000183307	TMEM121B	Control vs JetLag - all samples	LimmaVoom	0.676004	-1.99393	0.0407769	0.605626
ENSG00000106436	MYL10	Control vs JetLag - all samples	LimmaVoom	0.675964	-0.164887	0.0535378	0.634969
ENSG00000161914	ZNF653	Control vs JetLag - all samples	LimmaVoom	0.675344	1.62042	0.00792652	0.448836
ENSG00000176058	TPRN	Control vs JetLag - all samples	LimmaVoom	0.675318	2.09209	0.00321681	0.395735
ENSG00000273026	AL358472.3	Control vs JetLag - all samples	LimmaVoom	0.674114	-2.37834	0.00625951	0.43469
ENSG00000261061	AC092718.4	Control vs JetLag - all samples	LimmaVoom	0.673248	0.597394	0.0367928	0.597038
ENSG00000157021	FAM92A1P1	Control vs JetLag - all samples	LimmaVoom	0.672722	-0.33335	0.0759047	0.669963
ENSG00000267504	AC090236.2	Control vs JetLag - all samples	LimmaVoom	0.672583	-1.2358	0.0666653	0.657134
ENSG00000278932	CR381653.1	Control vs JetLag - all samples	LimmaVoom	0.672535	-0.399004	0.0464554	0.622626
ENSG00000260261	AC124944.3	Control vs JetLag - all samples	LimmaVoom	0.672062	0.397466	0.0308587	0.585011
ENSG00000169710	FASN	Control vs JetLag - all samples	LimmaVoom	0.671718	4.37259	0.00256496	0.378125
ENSG00000233508	AL021395.1	Control vs JetLag - all samples	LimmaVoom	0.671646	-2.53577	0.00583282	0.429954
ENSG00000269399	AC008764.6	Control vs JetLag - all samples	LimmaVoom	0.671269	0.394476	0.0189144	0.542296
ENSG00000263105	AC009171.2	Control vs JetLag - all samples	LimmaVoom	0.671245	-1.7879	0.0393625	0.601731
ENSG00000183831	ANKRD45	Control vs JetLag - all samples	LimmaVoom	0.671026	-1.96614	0.0364303	0.596395
ENSG00000173175	ADCY5	Control vs JetLag - all samples	LimmaVoom	0.669713	-0.662606	0.0778731	0.671864
ENSG00000260064	AC092332.1	Control vs JetLag - all samples	LimmaVoom	0.669356	-2.26323	0.0294642	0.583062
ENSG00000130489	SCO2	Control vs JetLag - all samples	LimmaVoom	0.669091	-0.672658	0.042869	0.612049
ENSG00000269466	AC233724.13	Control vs JetLag - all samples	LimmaVoom	0.669087	-1.95414	0.0454614	0.621629
ENSG00000226686	LINC01535	Control vs JetLag - all samples	LimmaVoom	0.668306	0.393247	0.0247763	0.561875
ENSG00000160284	SPATC1L	Control vs JetLag - all samples	LimmaVoom	0.66687	1.45481	0.00861012	0.459338
ENSG00000226070	AL139275.1	Control vs JetLag - all samples	LimmaVoom	0.6658	-1.43088	0.0710856	0.664937
ENSG00000173918	C1QTNF1	Control vs JetLag - all samples	LimmaVoom	0.665785	0.178403	0.0483175	0.627133
ENSG00000274421	AL162390.1	Control vs JetLag - all samples	LimmaVoom	0.665474	-1.22548	0.076762	0.670268
ENSG00000089820	ARHGAP4	Control vs JetLag - all samples	LimmaVoom	0.663377	0.350472	0.0459159	0.622025
ENSG00000240057	AC078785.1	Control vs JetLag - all samples	LimmaVoom	0.663043	-1.70856	0.0472079	0.624709
ENSG00000259663	AC010478.1	Control vs JetLag - all samples	LimmaVoom	0.66253	-0.445818	0.0781395	0.671864
ENSG00000272172	AC138696.2	Control vs JetLag - all samples	LimmaVoom	0.662151	-0.751987	0.111657	0.707512
ENSG00000170989	S1PR1	Control vs JetLag - all samples	LimmaVoom	0.661786	-1.29973	0.0791974	0.672919
ENSG00000179528	LBX2	Control vs JetLag - all samples	LimmaVoom	0.661682	1.97164	0.000923446	0.355256
ENSG00000136750	GAD2	Control vs JetLag - all samples	LimmaVoom	0.661456	-1.74222	0.0267984	0.573131
ENSG00000225489	AL354707.1	Control vs JetLag - all samples	LimmaVoom	0.661453	-2.42745	0.00859701	0.459338
ENSG00000161958	FGF11	Control vs JetLag - all samples	LimmaVoom	0.661356	-0.454841	0.0372479	0.597515
ENSG00000060709	RIMBP2	Control vs JetLag - all samples	LimmaVoom	0.661067	-0.238939	0.0451336	0.620235
ENSG00000228956	SATB1-AS1	Control vs JetLag - all samples	LimmaVoom	0.660304	-0.95569	0.101603	0.699639
ENSG00000180720	CHRM4	Control vs JetLag - all samples	LimmaVoom	0.659261	0.924775	0.034277	0.590034
ENSG00000078596	ITM2A	Control vs JetLag - all samples	LimmaVoom	0.658972	-1.94444	0.0663439	0.656683
ENSG00000259723	AL354993.2	Control vs JetLag - all samples	LimmaVoom	0.658875	-2.2669	0.0372049	0.597222
ENSG00000196517	SLC6A9	Control vs JetLag - all samples	LimmaVoom	0.658512	1.44158	0.0531494	0.634969
ENSG00000232070	TMEM253	Control vs JetLag - all samples	LimmaVoom	0.657905	-0.729805	0.102586	0.700162
ENSG00000214892	USP8P1	Control vs JetLag - all samples	LimmaVoom	0.657301	-1.97545	0.0504128	0.630505
ENSG00000277526	AC245123.1	Control vs JetLag - all samples	LimmaVoom	0.656617	-2.41791	0.0118444	0.491948
ENSG00000140691	ARMC5	Control vs JetLag - all samples	LimmaVoom	0.656485	2.50326	0.00209384	0.373334
ENSG00000172349	IL16	Control vs JetLag - all samples	LimmaVoom	0.655754	-2.25186	0.0240959	0.5614
ENSG00000237289	CKMT1B	Control vs JetLag - all samples	LimmaVoom	0.65566	-0.929399	0.0644375	0.654456
ENSG00000257122	RRN3P3	Control vs JetLag - all samples	LimmaVoom	0.655286	0.810928	0.0177995	0.535403
ENSG00000152117	AC073869.1	Control vs JetLag - all samples	LimmaVoom	0.655188	2.41909	0.0133098	0.507802
ENSG00000226085	UQCRFS1P1	Control vs JetLag - all samples	LimmaVoom	0.654623	-2.31369	0.013872	0.511112
ENSG00000267702	AP005131.6	Control vs JetLag - all samples	LimmaVoom	0.654398	-0.98294	0.117927	0.713748
ENSG00000258311	AC009779.3	Control vs JetLag - all samples	LimmaVoom	0.653952	1.81291	0.0289341	0.58103
ENSG00000266554	LINC01443	Control vs JetLag - all samples	LimmaVoom	0.653921	-0.719557	0.0685933	0.661347
ENSG00000198821	CD247	Control vs JetLag - all samples	LimmaVoom	0.653486	-2.00966	0.0519921	0.633838
ENSG00000132702	HAPLN2	Control vs JetLag - all samples	LimmaVoom	0.653362	0.18378	0.0489602	0.628486
ENSG00000271853	AL162258.1	Control vs JetLag - all samples	LimmaVoom	0.653221	-1.09044	0.111138	0.707512
ENSG00000168282	MGAT2	Control vs JetLag - all samples	LimmaVoom	0.653026	3.84474	0.00187087	0.37003
ENSG00000254838	GVINP1	Control vs JetLag - all samples	LimmaVoom	0.652727	0.154289	0.10151	0.699508
ENSG00000283052	LINC02456	Control vs JetLag - all samples	LimmaVoom	0.652705	-0.475031	0.0617715	0.651959
ENSG00000197859	ADAMTSL2	Control vs JetLag - all samples	LimmaVoom	0.652416	-0.338597	0.0718095	0.665476
ENSG00000100302	RASD2	Control vs JetLag - all samples	LimmaVoom	0.652328	1.14414	0.0381705	0.600344
ENSG00000262412	AL160291.1	Control vs JetLag - all samples	LimmaVoom	0.651873	-1.54	0.0649235	0.655359
ENSG00000186854	TRABD2A	Control vs JetLag - all samples	LimmaVoom	0.651828	1.15877	0.0427291	0.611904
ENSG00000139567	ACVRL1	Control vs JetLag - all samples	LimmaVoom	0.651721	-1.67162	0.0694783	0.66167
ENSG00000167771	RCOR2	Control vs JetLag - all samples	LimmaVoom	0.651173	1.07293	0.0256362	0.565481
ENSG00000136352	NKX2-1	Control vs JetLag - all samples	LimmaVoom	0.65072	0.000647984	0.0591215	0.645621
ENSG00000279861	AC073548.1	Control vs JetLag - all samples	LimmaVoom	0.650277	-0.0953929	0.0551485	0.638925
ENSG00000162692	VCAM1	Control vs JetLag - all samples	LimmaVoom	0.649855	-0.899561	0.132045	0.725509
ENSG00000126583	PRKCG	Control vs JetLag - all samples	LimmaVoom	0.649831	-1.55665	0.0430827	0.612474
ENSG00000100979	PLTP	Control vs JetLag - all samples	LimmaVoom	0.649688	-1.33438	0.084931	0.682116
ENSG00000109089	CDR2L	Control vs JetLag - all samples	LimmaVoom	0.649285	1.89546	0.00682404	0.439423
ENSG00000272669	AL021707.6	Control vs JetLag - all samples	LimmaVoom	0.649128	-2.02598	0.0321308	0.585878
ENSG00000140479	PCSK6	Control vs JetLag - all samples	LimmaVoom	0.648633	-0.212215	0.107863	0.703793
ENSG00000126733	DACH2	Control vs JetLag - all samples	LimmaVoom	0.648235	-0.197187	0.0874206	0.684523
ENSG00000270083	AL021878.2	Control vs JetLag - all samples	LimmaVoom	0.648079	0.0430187	0.027058	0.573924
ENSG00000141448	GATA6	Control vs JetLag - all samples	LimmaVoom	0.647667	-0.299607	0.123878	0.716755
ENSG00000144290	SLC4A10	Control vs JetLag - all samples	LimmaVoom	0.647588	-2.17005	0.0307542	0.585011
ENSG00000184922	FMNL1	Control vs JetLag - all samples	LimmaVoom	0.647388	1.66251	0.00999211	0.480958
ENSG00000176842	IRX5	Control vs JetLag - all samples	LimmaVoom	0.647335	-1.85014	0.0626952	0.652445
ENSG00000205832	C16orf96	Control vs JetLag - all samples	LimmaVoom	0.646626	-1.77547	0.0541417	0.636216
ENSG00000270194	AC097359.2	Control vs JetLag - all samples	LimmaVoom	0.646586	1.51774	0.0428847	0.612049
ENSG00000171051	FPR1	Control vs JetLag - all samples	LimmaVoom	0.646366	-1.28763	0.0796059	0.673039
ENSG00000204882	GPR20	Control vs JetLag - all samples	LimmaVoom	0.646076	-1.42454	0.0948243	0.692889
ENSG00000262728	AC123768.3	Control vs JetLag - all samples	LimmaVoom	0.645485	-1.02907	0.105969	0.703254
ENSG00000277978	AC010542.5	Control vs JetLag - all samples	LimmaVoom	0.645373	-2.36144	0.035475	0.595119
ENSG00000279035	AC022211.4	Control vs JetLag - all samples	LimmaVoom	0.643871	-0.473824	0.0767953	0.670268
ENSG00000182796	TMEM198B	Control vs JetLag - all samples	LimmaVoom	0.643367	0.650879	0.030826	0.585011
ENSG00000186019	AC021092.1	Control vs JetLag - all samples	LimmaVoom	0.642944	-0.890973	0.0791588	0.672919
ENSG00000183066	WBP2NL	Control vs JetLag - all samples	LimmaVoom	0.642632	0.277888	0.0325655	0.587541
ENSG00000274561	AC005332.6	Control vs JetLag - all samples	LimmaVoom	0.642425	-0.855547	0.0944217	0.691645
ENSG00000251598	AC096711.3	Control vs JetLag - all samples	LimmaVoom	0.642369	-2.11287	0.0348211	0.592363
ENSG00000234378	AC098828.3	Control vs JetLag - all samples	LimmaVoom	0.641672	-2.11757	0.0837448	0.682116
ENSG00000110148	CCKBR	Control vs JetLag - all samples	LimmaVoom	0.641264	-2.23715	0.0332588	0.589309
ENSG00000198719	DLL1	Control vs JetLag - all samples	LimmaVoom	0.640957	0.975768	0.00795873	0.448836
ENSG00000164304	CAGE1	Control vs JetLag - all samples	LimmaVoom	0.64072	-0.966726	0.0822479	0.679052
ENSG00000157766	ACAN	Control vs JetLag - all samples	LimmaVoom	0.640477	-1.05319	0.11171	0.707512
ENSG00000244513	AC109587.1	Control vs JetLag - all samples	LimmaVoom	0.640332	-1.64378	0.0909876	0.687296
ENSG00000196337	CGB7	Control vs JetLag - all samples	LimmaVoom	0.640019	-1.43148	0.102982	0.70057
ENSG00000267072	NAGPA-AS1	Control vs JetLag - all samples	LimmaVoom	0.639733	-2.36476	0.00692126	0.439423
ENSG00000179698	WDR97	Control vs JetLag - all samples	LimmaVoom	0.639344	0.150049	0.0407246	0.605626
ENSG00000218069	RSL24D1P1	Control vs JetLag - all samples	LimmaVoom	0.63924	-2.35291	0.0207527	0.550488
ENSG00000112599	GUCA1B	Control vs JetLag - all samples	LimmaVoom	0.638913	-0.633192	0.0882846	0.685028
ENSG00000280445	AL049536.1	Control vs JetLag - all samples	LimmaVoom	0.638634	-2.21871	0.0437139	0.612873
ENSG00000228252	COL6A4P2	Control vs JetLag - all samples	LimmaVoom	0.638632	-2.57859	0.00147895	0.361136
ENSG00000234890	HNRNPDLP2	Control vs JetLag - all samples	LimmaVoom	0.638323	-2.48653	0.00467611	0.418145
ENSG00000101638	ST8SIA5	Control vs JetLag - all samples	LimmaVoom	0.637683	-1.53827	0.112726	0.707803
ENSG00000272081	AC008972.2	Control vs JetLag - all samples	LimmaVoom	0.637089	-0.189932	0.0376166	0.598263
ENSG00000223599	AL513523.1	Control vs JetLag - all samples	LimmaVoom	0.637077	-1.97164	0.0574156	0.643329
ENSG00000128655	PDE11A	Control vs JetLag - all samples	LimmaVoom	0.637051	-1.30321	0.0918338	0.688046
ENSG00000265478	AC107982.3	Control vs JetLag - all samples	LimmaVoom	0.636962	-2.08797	0.0312698	0.585269
ENSG00000168062	BATF2	Control vs JetLag - all samples	LimmaVoom	0.636447	-0.811265	0.158531	0.744617
ENSG00000196296	ATP2A1	Control vs JetLag - all samples	LimmaVoom	0.636243	-0.806168	0.0652944	0.655359
ENSG00000167968	DNASE1L2	Control vs JetLag - all samples	LimmaVoom	0.636004	-0.316988	0.0680815	0.660623
ENSG00000244560	AC004890.2	Control vs JetLag - all samples	LimmaVoom	0.635704	-0.743861	0.0745593	0.668775
ENSG00000130881	LRP3	Control vs JetLag - all samples	LimmaVoom	0.634687	4.6057	0.00731788	0.441271
ENSG00000166104	AC126323.1	Control vs JetLag - all samples	LimmaVoom	0.633581	-0.337194	0.114964	0.710265
ENSG00000063438	AHRR	Control vs JetLag - all samples	LimmaVoom	0.63344	2.04212	0.00184165	0.37003
ENSG00000090006	LTBP4	Control vs JetLag - all samples	LimmaVoom	0.633137	3.77482	0.00400711	0.417993
ENSG00000228022	HCG20	Control vs JetLag - all samples	LimmaVoom	0.632611	-1.72667	0.0461296	0.622252
ENSG00000174938	SEZ6L2	Control vs JetLag - all samples	LimmaVoom	0.632049	2.74268	0.00174515	0.37003
ENSG00000110169	HPX	Control vs JetLag - all samples	LimmaVoom	0.631491	-2.20163	0.0275033	0.575083
ENSG00000142156	COL6A1	Control vs JetLag - all samples	LimmaVoom	0.630846	5.63165	0.000636094	0.327454
ENSG00000171402	XAGE3	Control vs JetLag - all samples	LimmaVoom	0.630842	-1.61078	0.109678	0.705956
ENSG00000132024	CC2D1A	Control vs JetLag - all samples	LimmaVoom	0.630466	1.81428	0.0626358	0.652445
ENSG00000278202	AC243919.1	Control vs JetLag - all samples	LimmaVoom	0.630319	-2.23294	0.0338827	0.590034
ENSG00000154118	JPH3	Control vs JetLag - all samples	LimmaVoom	0.630311	3.79722	0.000379889	0.28927
ENSG00000279557	AC010435.1	Control vs JetLag - all samples	LimmaVoom	0.630163	-2.42063	0.00674279	0.438646
ENSG00000273297	AC009275.1	Control vs JetLag - all samples	LimmaVoom	0.629942	-0.358839	0.168015	0.754974
ENSG00000279162	AC141586.5	Control vs JetLag - all samples	LimmaVoom	0.629657	-1.99853	0.0614908	0.651421
ENSG00000171840	NINJ2	Control vs JetLag - all samples	LimmaVoom	0.629196	-0.651387	0.0831603	0.681501
ENSG00000188659	SAXO2	Control vs JetLag - all samples	LimmaVoom	0.629029	-0.187223	0.0494157	0.629734
ENSG00000149633	KIAA1755	Control vs JetLag - all samples	LimmaVoom	0.628578	-1.61601	0.0716724	0.665476
ENSG00000261219	AC090651.1	Control vs JetLag - all samples	LimmaVoom	0.628274	-1.84185	0.0934673	0.689944
ENSG00000258469	CHMP4BP1	Control vs JetLag - all samples	LimmaVoom	0.628244	-2.32552	0.0218537	0.552669
ENSG00000256913	AC005840.4	Control vs JetLag - all samples	LimmaVoom	0.627793	-2.44656	0.00708442	0.440206
ENSG00000275494	AC133552.6	Control vs JetLag - all samples	LimmaVoom	0.627566	0.57082	0.0292208	0.581225
ENSG00000262580	AC087741.1	Control vs JetLag - all samples	LimmaVoom	0.627549	-0.692873	0.0301945	0.584514
ENSG00000173621	LRFN4	Control vs JetLag - all samples	LimmaVoom	0.627028	4.36592	0.00196382	0.37003
ENSG00000205494	OR52A4P	Control vs JetLag - all samples	LimmaVoom	0.626854	-1.03995	0.0781482	0.671864
ENSG00000246523	AP001528.1	Control vs JetLag - all samples	LimmaVoom	0.62683	-0.745977	0.116383	0.712111
ENSG00000176383	B3GNT4	Control vs JetLag - all samples	LimmaVoom	0.626777	-0.743215	0.0891411	0.685959
ENSG00000276115	AC026356.2	Control vs JetLag - all samples	LimmaVoom	0.62662	-0.981586	0.0754464	0.669149
ENSG00000263278	AC233701.1	Control vs JetLag - all samples	LimmaVoom	0.626561	-1.9314	0.0857621	0.682623
ENSG00000064687	ABCA7	Control vs JetLag - all samples	LimmaVoom	0.625984	0.626918	0.0433771	0.612588
ENSG00000180900	SCRIB	Control vs JetLag - all samples	LimmaVoom	0.624882	4.75701	0.001016	0.355256
ENSG00000279495	AL928654.5	Control vs JetLag - all samples	LimmaVoom	0.624826	0.424111	0.108341	0.704601
ENSG00000186523	FAM86B1	Control vs JetLag - all samples	LimmaVoom	0.624147	-0.135822	0.0954674	0.693701
ENSG00000173546	CSPG4	Control vs JetLag - all samples	LimmaVoom	0.623551	1.81986	0.0310317	0.585269
ENSG00000185437	SH3BGR	Control vs JetLag - all samples	LimmaVoom	0.623171	-0.40666	0.0614687	0.651421
ENSG00000188389	PDCD1	Control vs JetLag - all samples	LimmaVoom	0.62299	1.20126	0.0275298	0.575201
ENSG00000170382	LRRN2	Control vs JetLag - all samples	LimmaVoom	0.622924	-0.776325	0.109872	0.706152
ENSG00000232024	LSM12P1	Control vs JetLag - all samples	LimmaVoom	0.622877	-2.065	0.0395285	0.602456
ENSG00000228486	LINC01125	Control vs JetLag - all samples	LimmaVoom	0.622757	-1.21535	0.102992	0.70057
ENSG00000253266	AC100860.1	Control vs JetLag - all samples	LimmaVoom	0.622229	-1.91445	0.0752956	0.668965
ENSG00000279347	AC021945.1	Control vs JetLag - all samples	LimmaVoom	0.622142	-1.7764	0.0494158	0.629734
ENSG00000272668	AL590560.2	Control vs JetLag - all samples	LimmaVoom	0.62138	-2.02334	0.0539255	0.636173
ENSG00000254023	PKMP4	Control vs JetLag - all samples	LimmaVoom	0.621059	-2.39831	0.00635195	0.434764
ENSG00000258429	PDF	Control vs JetLag - all samples	LimmaVoom	0.620966	0.757689	0.0151714	0.519172
ENSG00000107807	TLX1	Control vs JetLag - all samples	LimmaVoom	0.620954	-0.637567	0.0948941	0.692953
ENSG00000132465	JCHAIN	Control vs JetLag - all samples	LimmaVoom	0.620914	-2.33071	0.0305009	0.584514
ENSG00000163093	BBS5	Control vs JetLag - all samples	LimmaVoom	0.620594	1.7651	0.00071121	0.327866
ENSG00000176182	MYPOP	Control vs JetLag - all samples	LimmaVoom	0.620496	-0.510426	0.0949024	0.692953
ENSG00000243708	PLA2G4B	Control vs JetLag - all samples	LimmaVoom	0.61972	-0.938777	0.0860254	0.68323
ENSG00000188483	IER5L	Control vs JetLag - all samples	LimmaVoom	0.619608	4.15114	0.00236369	0.375621
ENSG00000163520	FBLN2	Control vs JetLag - all samples	LimmaVoom	0.61911	-1.43682	0.152628	0.741954
ENSG00000204950	LRRC10B	Control vs JetLag - all samples	LimmaVoom	0.618821	-1.18689	0.0624835	0.651959
ENSG00000257925	AC008083.1	Control vs JetLag - all samples	LimmaVoom	0.618685	-2.31935	0.0106696	0.483657
ENSG00000058453	CROCC	Control vs JetLag - all samples	LimmaVoom	0.618321	1.68093	0.00141354	0.361136
ENSG00000279217	Z95114.1	Control vs JetLag - all samples	LimmaVoom	0.618155	-2.27004	0.0595619	0.648492
ENSG00000171222	SCAND1	Control vs JetLag - all samples	LimmaVoom	0.61741	5.53617	0.00235205	0.375621
ENSG00000227507	LTB	Control vs JetLag - all samples	LimmaVoom	0.617186	-1.12451	0.120019	0.714388
ENSG00000139438	FAM222A	Control vs JetLag - all samples	LimmaVoom	0.616523	-0.919167	0.10977	0.706104
ENSG00000187013	C17orf82	Control vs JetLag - all samples	LimmaVoom	0.61643	1.7303	0.0238404	0.561206
ENSG00000132329	RAMP1	Control vs JetLag - all samples	LimmaVoom	0.616069	-0.619549	0.0919712	0.688419
ENSG00000143369	ECM1	Control vs JetLag - all samples	LimmaVoom	0.615604	1.89287	0.00780466	0.448836
ENSG00000279631	AL158211.5	Control vs JetLag - all samples	LimmaVoom	0.615408	3.07989	0.000520731	0.302106
ENSG00000226944	AL031847.1	Control vs JetLag - all samples	LimmaVoom	0.615254	-2.13577	0.0334308	0.589309
ENSG00000236618	PITPNA-AS1	Control vs JetLag - all samples	LimmaVoom	0.61515	1.19753	0.0110841	0.483657
ENSG00000283959	AP002851.1	Control vs JetLag - all samples	LimmaVoom	0.614994	-0.960027	0.143623	0.735641
ENSG00000149557	FEZ1	Control vs JetLag - all samples	LimmaVoom	0.614806	1.13846	0.0155071	0.519172
ENSG00000188157	AGRN	Control vs JetLag - all samples	LimmaVoom	0.61479	5.65223	0.00230108	0.373982
ENSG00000283709	FAM238C	Control vs JetLag - all samples	LimmaVoom	0.61439	-1.91621	0.0513859	0.63274
ENSG00000241269	AC093620.1	Control vs JetLag - all samples	LimmaVoom	0.613984	-2.12911	0.0424741	0.611904
ENSG00000225554	AL359764.1	Control vs JetLag - all samples	LimmaVoom	0.613346	-2.16853	0.0645045	0.654456
ENSG00000168959	GRM5	Control vs JetLag - all samples	LimmaVoom	0.612484	-1.65127	0.103007	0.70057
ENSG00000148357	HMCN2	Control vs JetLag - all samples	LimmaVoom	0.611527	-0.164659	0.075197	0.668965
ENSG00000228594	FNDC10	Control vs JetLag - all samples	LimmaVoom	0.611322	0.31179	0.0324418	0.586713
ENSG00000235571	SNX18P14	Control vs JetLag - all samples	LimmaVoom	0.610473	1.93992	0.0576166	0.643368
ENSG00000075886	TUBA3D	Control vs JetLag - all samples	LimmaVoom	0.610435	0.553163	0.0160843	0.521172
ENSG00000239713	APOBEC3G	Control vs JetLag - all samples	LimmaVoom	0.610406	1.11812	0.0473273	0.62561
ENSG00000258303	AC012464.2	Control vs JetLag - all samples	LimmaVoom	0.610399	-2.39425	0.0221117	0.552669
ENSG00000115353	TACR1	Control vs JetLag - all samples	LimmaVoom	0.610353	-1.99181	0.0629417	0.65251
ENSG00000064932	SBNO2	Control vs JetLag - all samples	LimmaVoom	0.610274	3.47323	0.00141717	0.361136
ENSG00000198312	BMS1P9	Control vs JetLag - all samples	LimmaVoom	0.609891	-0.421354	0.0825526	0.679725
ENSG00000178125	PPP1R42	Control vs JetLag - all samples	LimmaVoom	0.609344	-1.80753	0.096858	0.694788
ENSG00000012223	LTF	Control vs JetLag - all samples	LimmaVoom	0.609186	-2.45616	0.00969639	0.479571
ENSG00000112539	C6orf118	Control vs JetLag - all samples	LimmaVoom	0.609069	-0.534923	0.0857276	0.682497
ENSG00000223692	DIP2A-IT1	Control vs JetLag - all samples	LimmaVoom	0.608946	-2.48441	0.00488507	0.421248
ENSG00000284636	AC073648.6	Control vs JetLag - all samples	LimmaVoom	0.60878	-1.34663	0.120391	0.714388
ENSG00000277893	SRD5A2	Control vs JetLag - all samples	LimmaVoom	0.60856	-0.925544	0.149618	0.740359
ENSG00000273540	AGBL1	Control vs JetLag - all samples	LimmaVoom	0.607678	0.0806905	0.0736423	0.668775
ENSG00000261559	FSCN1P1	Control vs JetLag - all samples	LimmaVoom	0.607589	-2.27838	0.0158287	0.519172
ENSG00000180921	FAM83H	Control vs JetLag - all samples	LimmaVoom	0.607485	3.49652	0.00242802	0.377634
ENSG00000186340	THBS2	Control vs JetLag - all samples	LimmaVoom	0.60711	-1.06796	0.10096	0.699035
ENSG00000154928	EPHB1	Control vs JetLag - all samples	LimmaVoom	0.607099	-1.80941	0.0961782	0.693753
ENSG00000261315	AC103988.1	Control vs JetLag - all samples	LimmaVoom	0.60682	-2.4319	0.0319557	0.585878
ENSG00000269246	AC011445.2	Control vs JetLag - all samples	LimmaVoom	0.60667	-1.07318	0.0762339	0.670123
ENSG00000274825	AL023803.2	Control vs JetLag - all samples	LimmaVoom	0.606449	-1.77286	0.0624191	0.651959
ENSG00000034239	EFCAB1	Control vs JetLag - all samples	LimmaVoom	0.60614	-1.4131	0.127032	0.720465
ENSG00000157765	SLC34A2	Control vs JetLag - all samples	LimmaVoom	0.606105	-2.46428	0.0145425	0.512566
ENSG00000214338	SOGA3	Control vs JetLag - all samples	LimmaVoom	0.605724	-2.64904	0.00665539	0.438297
ENSG00000175084	DES	Control vs JetLag - all samples	LimmaVoom	0.605713	-1.57228	0.0873991	0.684523
ENSG00000251322	SHANK3	Control vs JetLag - all samples	LimmaVoom	0.605091	1.31944	0.0124329	0.49811
ENSG00000164849	GPR146	Control vs JetLag - all samples	LimmaVoom	0.605042	-0.629843	0.0541905	0.636216
ENSG00000268225	AC010487.1	Control vs JetLag - all samples	LimmaVoom	0.60487	-0.907356	0.0723092	0.66723
ENSG00000135374	ELF5	Control vs JetLag - all samples	LimmaVoom	0.604675	-1.64783	0.237134	0.801374
ENSG00000233924	RPSAP13	Control vs JetLag - all samples	LimmaVoom	0.604646	-1.29628	0.136572	0.729188
ENSG00000235217	TSPY26P	Control vs JetLag - all samples	LimmaVoom	0.604347	-1.76306	0.0804301	0.675289
ENSG00000279022	AL359715.5	Control vs JetLag - all samples	LimmaVoom	0.603731	-2.1987	0.0352611	0.593757
ENSG00000067840	PDZD4	Control vs JetLag - all samples	LimmaVoom	0.603646	3.57908	0.0108677	0.483657
ENSG00000245857	GS1-24F4.2	Control vs JetLag - all samples	LimmaVoom	0.603369	-1.50513	0.146201	0.737054
ENSG00000224046	AC005076.1	Control vs JetLag - all samples	LimmaVoom	0.602533	0.510829	0.0828782	0.681178
ENSG00000274213	AC015912.3	Control vs JetLag - all samples	LimmaVoom	0.602337	0.241449	0.0384317	0.600557
ENSG00000253632	AC084026.2	Control vs JetLag - all samples	LimmaVoom	0.602337	-0.743589	0.0986524	0.697553
ENSG00000134590	RTL8C	Control vs JetLag - all samples	LimmaVoom	0.601897	3.60129	0.000450533	0.29387
ENSG00000228980	LINC01205	Control vs JetLag - all samples	LimmaVoom	0.601696	-1.70806	0.05098	0.631344
ENSG00000232926	AC000078.1	Control vs JetLag - all samples	LimmaVoom	0.601537	-1.95142	0.0559616	0.641794
ENSG00000131650	KREMEN2	Control vs JetLag - all samples	LimmaVoom	0.601261	3.16331	0.000672375	0.327866
ENSG00000183458	AC138932.1	Control vs JetLag - all samples	LimmaVoom	0.601111	-0.449796	0.106061	0.703254
ENSG00000213658	LAT	Control vs JetLag - all samples	LimmaVoom	0.600514	2.33723	0.000342993	0.284918
ENSG00000265692	LINC01970	Control vs JetLag - all samples	LimmaVoom	0.599555	1.95299	0.00686417	0.439423
ENSG00000240399	AC004801.2	Control vs JetLag - all samples	LimmaVoom	0.599534	-2.01641	0.088386	0.685028
ENSG00000131116	ZNF428	Control vs JetLag - all samples	LimmaVoom	0.599465	4.81895	4.84687e-06	0.0897884
ENSG00000110324	IL10RA	Control vs JetLag - all samples	LimmaVoom	0.599225	-1.91081	0.0841682	0.682116
ENSG00000198598	MMP17	Control vs JetLag - all samples	LimmaVoom	0.598767	0.155249	0.0830011	0.681213
ENSG00000111218	PRMT8	Control vs JetLag - all samples	LimmaVoom	0.598754	-1.6283	0.0806634	0.675541
ENSG00000229391	HLA-DRB6	Control vs JetLag - all samples	LimmaVoom	0.598384	-1.55129	0.0598006	0.648639
ENSG00000182871	COL18A1	Control vs JetLag - all samples	LimmaVoom	0.598225	1.38357	0.0321392	0.585878
ENSG00000069206	ADAM7	Control vs JetLag - all samples	LimmaVoom	0.598054	-2.32373	0.0280387	0.576486
ENSG00000236427	AL589986.2	Control vs JetLag - all samples	LimmaVoom	0.597977	-2.14959	0.0583029	0.645194
ENSG00000266265	KLF14	Control vs JetLag - all samples	LimmaVoom	0.597512	-1.84972	0.113759	0.708327
ENSG00000265096	C1QTNF1-AS1	Control vs JetLag - all samples	LimmaVoom	0.5975	-2.02724	0.0750039	0.668775
ENSG00000281912	LINC01144	Control vs JetLag - all samples	LimmaVoom	0.597044	1.46529	0.00467911	0.418145
ENSG00000254505	CHMP4A	Control vs JetLag - all samples	LimmaVoom	0.596848	0.508961	0.0751297	0.668775
ENSG00000075673	ATP12A	Control vs JetLag - all samples	LimmaVoom	0.596839	-2.09972	0.0436051	0.612873
ENSG00000279369	AC046185.3	Control vs JetLag - all samples	LimmaVoom	0.596699	1.73395	0.00169267	0.37003
ENSG00000257869	AL139023.1	Control vs JetLag - all samples	LimmaVoom	0.596379	-0.473945	0.0713307	0.665476
ENSG00000280649	AC245100.8	Control vs JetLag - all samples	LimmaVoom	0.595928	0.315287	0.0433908	0.612588
ENSG00000197180	CH17-340M24.3	Control vs JetLag - all samples	LimmaVoom	0.59581	0.297647	0.040822	0.606029
ENSG00000278876	AC145207.9	Control vs JetLag - all samples	LimmaVoom	0.594979	-1.89208	0.110436	0.707024
ENSG00000178814	OPLAH	Control vs JetLag - all samples	LimmaVoom	0.594889	4.04101	0.000721198	0.327866
ENSG00000196616	ADH1B	Control vs JetLag - all samples	LimmaVoom	0.594456	-1.8482	0.0732079	0.668239
ENSG00000270177	AC104109.2	Control vs JetLag - all samples	LimmaVoom	0.594376	0.629014	0.0652025	0.655359
ENSG00000276651	AC007950.2	Control vs JetLag - all samples	LimmaVoom	0.59377	-0.831456	0.105968	0.703254
ENSG00000233435	AGGF1P2	Control vs JetLag - all samples	LimmaVoom	0.593716	0.168135	0.0584319	0.645307
ENSG00000253320	AZIN1-AS1	Control vs JetLag - all samples	LimmaVoom	0.593695	-0.477292	0.0838741	0.682116
ENSG00000162849	KIF26B	Control vs JetLag - all samples	LimmaVoom	0.593476	-0.281189	0.109713	0.705956
ENSG00000215246	AC116351.1	Control vs JetLag - all samples	LimmaVoom	0.593285	-1.65325	0.063602	0.653493
ENSG00000267498	AC007786.1	Control vs JetLag - all samples	LimmaVoom	0.593282	-1.07545	0.153903	0.741954
ENSG00000278236	uc_338	Control vs JetLag - all samples	LimmaVoom	0.593079	-2.09175	0.0590856	0.645518
ENSG00000275223	AL121906.2	Control vs JetLag - all samples	LimmaVoom	0.592867	-1.1092	0.138319	0.730977
ENSG00000185774	KCNIP4	Control vs JetLag - all samples	LimmaVoom	0.59278	-1.09552	0.0737869	0.668775
ENSG00000185313	SCN10A	Control vs JetLag - all samples	LimmaVoom	0.592568	-2.01428	0.0518541	0.633312
ENSG00000263917	AC011825.3	Control vs JetLag - all samples	LimmaVoom	0.592417	-1.8668	0.148574	0.739126
ENSG00000250133	HOXC-AS2	Control vs JetLag - all samples	LimmaVoom	0.592388	-0.924442	0.125649	0.719404
ENSG00000164256	PRDM9	Control vs JetLag - all samples	LimmaVoom	0.592295	-1.38743	0.1496	0.740359
ENSG00000198113	TOR4A	Control vs JetLag - all samples	LimmaVoom	0.592156	4.66809	0.00254456	0.378125
ENSG00000184986	TMEM121	Control vs JetLag - all samples	LimmaVoom	0.592076	2.15408	0.0127169	0.501935
ENSG00000090975	PITPNM2	Control vs JetLag - all samples	LimmaVoom	0.591723	0.813783	0.026781	0.573131
ENSG00000134508	CABLES1	Control vs JetLag - all samples	LimmaVoom	0.591645	-1.89324	0.0772181	0.670545
ENSG00000176386	CDC26	Control vs JetLag - all samples	LimmaVoom	0.591402	1.1366	0.0670132	0.657345
ENSG00000118804	STBD1	Control vs JetLag - all samples	LimmaVoom	0.591396	0.510587	0.084816	0.682116
ENSG00000275294	LINC02340	Control vs JetLag - all samples	LimmaVoom	0.591272	-2.18323	0.0588848	0.645518
ENSG00000188747	NOXA1	Control vs JetLag - all samples	LimmaVoom	0.590482	1.54323	0.0178642	0.535631
ENSG00000117425	PTCH2	Control vs JetLag - all samples	LimmaVoom	0.590364	-1.98114	0.084161	0.682116
ENSG00000145075	CCDC39	Control vs JetLag - all samples	LimmaVoom	0.589924	-1.45438	0.0972175	0.695733
ENSG00000185345	PRKN	Control vs JetLag - all samples	LimmaVoom	0.589888	-1.07134	0.142738	0.735038
ENSG00000099364	FBXL19	Control vs JetLag - all samples	LimmaVoom	0.589691	3.96906	0.00365155	0.406342
ENSG00000101276	SLC52A3	Control vs JetLag - all samples	LimmaVoom	0.588288	-2.19561	0.0315389	0.585269
ENSG00000174403	C20orf166-AS1	Control vs JetLag - all samples	LimmaVoom	0.587984	-0.695227	0.0816062	0.67768
ENSG00000236120	AC110995.1	Control vs JetLag - all samples	LimmaVoom	0.587696	-0.716516	0.0824767	0.679725
ENSG00000214855	APOC1P1	Control vs JetLag - all samples	LimmaVoom	0.587664	-1.67746	0.112624	0.707529
ENSG00000170835	CEL	Control vs JetLag - all samples	LimmaVoom	0.587648	-2.33682	0.066072	0.656683
ENSG00000275763	C18orf65	Control vs JetLag - all samples	LimmaVoom	0.58751	-1.40276	0.145977	0.736986
ENSG00000070915	SLC12A3	Control vs JetLag - all samples	LimmaVoom	0.587431	-2.07905	0.0504942	0.630505
ENSG00000273363	AL353801.3	Control vs JetLag - all samples	LimmaVoom	0.587015	-0.272703	0.0997611	0.698385
ENSG00000215184	RPS12P16	Control vs JetLag - all samples	LimmaVoom	0.586503	-2.43171	0.0163756	0.524563
ENSG00000166126	AMN	Control vs JetLag - all samples	LimmaVoom	0.586471	-2.58481	0.00664065	0.438297
ENSG00000273604	EPOP	Control vs JetLag - all samples	LimmaVoom	0.58647	1.0729	0.046826	0.623494
ENSG00000197976	AKAP17A	Control vs JetLag - all samples	LimmaVoom	0.586261	2.39072	0.00790274	0.448836
ENSG00000253696	KBTBD11-OT1	Control vs JetLag - all samples	LimmaVoom	0.586163	-2.09467	0.0308813	0.585011
ENSG00000186847	KRT14	Control vs JetLag - all samples	LimmaVoom	0.585895	0.135624	0.114278	0.70919
ENSG00000103326	CAPN15	Control vs JetLag - all samples	LimmaVoom	0.585531	3.10602	0.0131587	0.507547
ENSG00000153563	CD8A	Control vs JetLag - all samples	LimmaVoom	0.58537	-1.01027	0.105822	0.703254
ENSG00000058404	CAMK2B	Control vs JetLag - all samples	LimmaVoom	0.585186	-0.510094	0.0548054	0.638145
ENSG00000257281	AC009729.1	Control vs JetLag - all samples	LimmaVoom	0.585058	-1.73197	0.100871	0.699035
ENSG00000172554	SNTG2	Control vs JetLag - all samples	LimmaVoom	0.584786	-0.800099	0.139713	0.733033
ENSG00000074370	ATP2A3	Control vs JetLag - all samples	LimmaVoom	0.58477	2.09472	0.00734794	0.441271
ENSG00000230943	LINC02541	Control vs JetLag - all samples	LimmaVoom	0.584727	-1.58492	0.128052	0.720955
ENSG00000260727	SLC7A5P1	Control vs JetLag - all samples	LimmaVoom	0.584675	-0.212113	0.141975	0.734897
ENSG00000255154	HTD2	Control vs JetLag - all samples	LimmaVoom	0.584363	-1.07633	0.112897	0.707942
ENSG00000274265	AC245297.3	Control vs JetLag - all samples	LimmaVoom	0.58435	-0.948254	0.109048	0.705097
ENSG00000205325	AC005863.1	Control vs JetLag - all samples	LimmaVoom	0.584245	0.0414845	0.0500521	0.630011
ENSG00000141194	OR4D1	Control vs JetLag - all samples	LimmaVoom	0.583696	-1.84924	0.102218	0.700162
ENSG00000134321	RSAD2	Control vs JetLag - all samples	LimmaVoom	0.583602	3.81753	0.00104003	0.355256
ENSG00000243181	AC087343.1	Control vs JetLag - all samples	LimmaVoom	0.583475	-2.27753	0.0315337	0.585269
ENSG00000145911	N4BP3	Control vs JetLag - all samples	LimmaVoom	0.582953	1.55004	0.0550895	0.638925
ENSG00000150275	PCDH15	Control vs JetLag - all samples	LimmaVoom	0.582752	-1.05719	0.139218	0.731811
ENSG00000224051	CPTP	Control vs JetLag - all samples	LimmaVoom	0.58252	2.43915	0.00670044	0.438646
ENSG00000180953	ST20	Control vs JetLag - all samples	LimmaVoom	0.582419	0.0938691	0.0360639	0.595993
ENSG00000144837	PLA1A	Control vs JetLag - all samples	LimmaVoom	0.582261	-0.715852	0.152792	0.741954
ENSG00000134115	CNTN6	Control vs JetLag - all samples	LimmaVoom	0.582153	-1.20029	0.159656	0.745836
ENSG00000225880	LINC00115	Control vs JetLag - all samples	LimmaVoom	0.581946	-0.438091	0.107734	0.703793
ENSG00000036530	CYP46A1	Control vs JetLag - all samples	LimmaVoom	0.581917	-2.18196	0.0609253	0.651421
ENSG00000165804	ZNF219	Control vs JetLag - all samples	LimmaVoom	0.580958	4.99889	0.00489662	0.421248
ENSG00000161082	CELF5	Control vs JetLag - all samples	LimmaVoom	0.580898	-0.598342	0.0760954	0.670123
ENSG00000175745	NR2F1	Control vs JetLag - all samples	LimmaVoom	0.580271	2.27889	0.0663744	0.656683
ENSG00000246596	AC139795.1	Control vs JetLag - all samples	LimmaVoom	0.580214	-1.08647	0.178311	0.765762
ENSG00000253741	AC108002.1	Control vs JetLag - all samples	LimmaVoom	0.579802	-0.036731	0.170792	0.757694
ENSG00000158286	RNF207	Control vs JetLag - all samples	LimmaVoom	0.579739	1.63846	0.00464301	0.418145
ENSG00000257846	AL512310.6	Control vs JetLag - all samples	LimmaVoom	0.579598	-2.43035	0.0332294	0.589309
ENSG00000174669	SLC29A2	Control vs JetLag - all samples	LimmaVoom	0.579418	1.1537	0.0624373	0.651959
ENSG00000106328	FSCN3	Control vs JetLag - all samples	LimmaVoom	0.579334	-2.24304	0.0091963	0.464289
ENSG00000205078	SYCE1L	Control vs JetLag - all samples	LimmaVoom	0.578925	1.92432	0.038761	0.600557
ENSG00000178082	AC005412.1	Control vs JetLag - all samples	LimmaVoom	0.578835	-2.132	0.0407721	0.605626
ENSG00000272449	AL139246.5	Control vs JetLag - all samples	LimmaVoom	0.578668	1.16044	0.0117601	0.491235
ENSG00000233198	RNF224	Control vs JetLag - all samples	LimmaVoom	0.578425	-2.41208	0.0137974	0.510936
ENSG00000184012	TMPRSS2	Control vs JetLag - all samples	LimmaVoom	0.578293	-1.35979	0.163124	0.749383
ENSG00000213398	LCAT	Control vs JetLag - all samples	LimmaVoom	0.578011	0.913216	0.0643394	0.654314
ENSG00000136928	GABBR2	Control vs JetLag - all samples	LimmaVoom	0.577847	-1.73966	0.100146	0.698794
ENSG00000261481	AC022167.4	Control vs JetLag - all samples	LimmaVoom	0.577445	-2.10978	0.0571143	0.642623
ENSG00000229962	AP000221.1	Control vs JetLag - all samples	LimmaVoom	0.577406	-2.31698	0.0344235	0.590034
ENSG00000104043	ATP8B4	Control vs JetLag - all samples	LimmaVoom	0.577261	-1.0774	0.126583	0.720305
ENSG00000256463	SALL3	Control vs JetLag - all samples	LimmaVoom	0.577106	-2.49219	0.00538056	0.426009
ENSG00000279307	AC012065.5	Control vs JetLag - all samples	LimmaVoom	0.576954	-2.33895	0.0467278	0.62308
ENSG00000178440	LINC00843	Control vs JetLag - all samples	LimmaVoom	0.576898	-1.57046	0.100297	0.698794
ENSG00000130522	JUND	Control vs JetLag - all samples	LimmaVoom	0.576687	4.74055	9.6806e-05	0.218252
ENSG00000174353	STAG3L3	Control vs JetLag - all samples	LimmaVoom	0.576651	-0.273553	0.0385054	0.600557
ENSG00000272927	AC107464.3	Control vs JetLag - all samples	LimmaVoom	0.576211	-2.38372	0.0277321	0.576158
ENSG00000234215	AC006012.1	Control vs JetLag - all samples	LimmaVoom	0.575813	-1.20191	0.126956	0.720367
ENSG00000007129	CEACAM21	Control vs JetLag - all samples	LimmaVoom	0.575608	-2.14815	0.0829588	0.681213
ENSG00000183186	C2CD4C	Control vs JetLag - all samples	LimmaVoom	0.575285	2.76479	0.0098946	0.480958
ENSG00000275765	AC091982.4	Control vs JetLag - all samples	LimmaVoom	0.575267	1.44318	0.0150295	0.519172
ENSG00000198610	AKR1C4	Control vs JetLag - all samples	LimmaVoom	0.57501	-2.60103	0.00729706	0.441271
ENSG00000231952	DPY19L1P2	Control vs JetLag - all samples	LimmaVoom	0.574992	-0.812659	0.135696	0.728074
ENSG00000115590	IL1R2	Control vs JetLag - all samples	LimmaVoom	0.574453	-0.579619	0.117154	0.712904
ENSG00000152284	TCF7L1	Control vs JetLag - all samples	LimmaVoom	0.574299	-1.04475	0.139898	0.733193
ENSG00000163064	EN1	Control vs JetLag - all samples	LimmaVoom	0.574137	-0.169762	0.133153	0.725509
ENSG00000243197	TUSC7	Control vs JetLag - all samples	LimmaVoom	0.573912	-2.51516	0.017812	0.535403
ENSG00000184363	PKP3	Control vs JetLag - all samples	LimmaVoom	0.573828	1.95724	0.0407067	0.605626
ENSG00000176928	GCNT4	Control vs JetLag - all samples	LimmaVoom	0.573749	0.153269	0.0690175	0.661646
ENSG00000144550	CPNE9	Control vs JetLag - all samples	LimmaVoom	0.573501	-2.26641	0.0447314	0.619361
ENSG00000283138	AC006207.1	Control vs JetLag - all samples	LimmaVoom	0.573292	-1.44768	0.0801876	0.675157
ENSG00000136867	SLC31A2	Control vs JetLag - all samples	LimmaVoom	0.572931	0.031947	0.137481	0.730593
ENSG00000277496	AL357033.4	Control vs JetLag - all samples	LimmaVoom	0.572868	0.00147521	0.0969889	0.694815
ENSG00000198914	POU3F3	Control vs JetLag - all samples	LimmaVoom	0.572328	1.51312	0.0165473	0.524962
ENSG00000135519	KCNH3	Control vs JetLag - all samples	LimmaVoom	0.57213	3.21062	0.00478531	0.42044
ENSG00000125954	CHURC1-FNTB	Control vs JetLag - all samples	LimmaVoom	0.571803	-1.79611	0.1023	0.700162
ENSG00000150281	CTF1	Control vs JetLag - all samples	LimmaVoom	0.571362	0.127396	0.0818878	0.678091
ENSG00000037280	FLT4	Control vs JetLag - all samples	LimmaVoom	0.571061	0.910327	0.0240665	0.5614
ENSG00000119242	CCDC92	Control vs JetLag - all samples	LimmaVoom	0.57106	-0.242143	0.0916817	0.687801
ENSG00000009709	PAX7	Control vs JetLag - all samples	LimmaVoom	0.571007	2.22838	0.0788905	0.672871
ENSG00000162746	FCRLB	Control vs JetLag - all samples	LimmaVoom	0.570633	0.458953	0.0270174	0.573924
ENSG00000260193	AL138781.1	Control vs JetLag - all samples	LimmaVoom	0.570589	-0.315436	0.133642	0.726339
ENSG00000248640	HNRNPA1P56	Control vs JetLag - all samples	LimmaVoom	0.570307	-2.49267	0.00707188	0.440206
ENSG00000107562	CXCL12	Control vs JetLag - all samples	LimmaVoom	0.570045	-2.216	0.0436871	0.612873
ENSG00000255045	AP000866.5	Control vs JetLag - all samples	LimmaVoom	0.569958	-2.36404	0.0343203	0.590034
ENSG00000172382	PRSS27	Control vs JetLag - all samples	LimmaVoom	0.569636	-0.0280821	0.0437895	0.612873
ENSG00000100350	FOXRED2	Control vs JetLag - all samples	LimmaVoom	0.569084	3.13017	0.00914981	0.464289
ENSG00000259818	AL606760.3	Control vs JetLag - all samples	LimmaVoom	0.568737	0.73334	0.0517995	0.633312
ENSG00000235529	AGAP1-IT1	Control vs JetLag - all samples	LimmaVoom	0.568723	-1.86476	0.084901	0.682116
ENSG00000258082	AL391832.3	Control vs JetLag - all samples	LimmaVoom	0.568394	-1.22663	0.141427	0.734314
ENSG00000233003	CICP26	Control vs JetLag - all samples	LimmaVoom	0.568369	-2.62932	0.00745061	0.443254
ENSG00000235749	AL390860.1	Control vs JetLag - all samples	LimmaVoom	0.567999	-0.0634287	0.075058	0.668775
ENSG00000233521	LINC01638	Control vs JetLag - all samples	LimmaVoom	0.567652	-0.350069	0.178878	0.76577
ENSG00000248943	AC140125.1	Control vs JetLag - all samples	LimmaVoom	0.567648	-1.03083	0.0981086	0.697396
ENSG00000169442	CD52	Control vs JetLag - all samples	LimmaVoom	0.567638	0.132901	0.101907	0.700108
ENSG00000158458	NRG2	Control vs JetLag - all samples	LimmaVoom	0.567458	-0.189303	0.102101	0.700162
ENSG00000257704	INAFM1	Control vs JetLag - all samples	LimmaVoom	0.567194	-0.299177	0.100703	0.699035
ENSG00000231083	AC011747.1	Control vs JetLag - all samples	LimmaVoom	0.567014	-1.0682	0.10475	0.7024
ENSG00000114771	AADAC	Control vs JetLag - all samples	LimmaVoom	0.566629	-1.18976	0.126832	0.720316
ENSG00000234062	AL390879.2	Control vs JetLag - all samples	LimmaVoom	0.56649	0.224313	0.0718049	0.665476
ENSG00000203499	IQANK1	Control vs JetLag - all samples	LimmaVoom	0.566343	-0.0697926	0.0725076	0.667396
ENSG00000168032	ENTPD3	Control vs JetLag - all samples	LimmaVoom	0.565992	-1.60585	0.104786	0.7024
ENSG00000234948	LINC01524	Control vs JetLag - all samples	LimmaVoom	0.565751	-1.94581	0.132805	0.725509
ENSG00000278434	AC023830.3	Control vs JetLag - all samples	LimmaVoom	0.565636	-1.8684	0.0921424	0.688572
ENSG00000248174	LINC02268	Control vs JetLag - all samples	LimmaVoom	0.564659	-2.25772	0.0771001	0.670545
ENSG00000247416	AP000802.1	Control vs JetLag - all samples	LimmaVoom	0.564553	-1.13223	0.117166	0.712904
ENSG00000241369	LINC01192	Control vs JetLag - all samples	LimmaVoom	0.564244	-2.43352	0.0347943	0.592363
ENSG00000127564	PKMYT1	Control vs JetLag - all samples	LimmaVoom	0.564236	3.17723	0.00504779	0.421526
ENSG00000131759	RARA	Control vs JetLag - all samples	LimmaVoom	0.564133	3.54344	0.000789096	0.327866
ENSG00000280870	MIR325HG	Control vs JetLag - all samples	LimmaVoom	0.563811	-1.90817	0.100525	0.699035
ENSG00000267528	AC008991.1	Control vs JetLag - all samples	LimmaVoom	0.563644	-2.26429	0.0396999	0.602839
ENSG00000261645	DISC1FP1	Control vs JetLag - all samples	LimmaVoom	0.563482	-1.40378	0.145274	0.736076
ENSG00000236204	LINC01376	Control vs JetLag - all samples	LimmaVoom	0.563462	0.598694	0.0872515	0.684197
ENSG00000253796	AC104248.1	Control vs JetLag - all samples	LimmaVoom	0.56312	-2.39922	0.025569	0.565022
ENSG00000197774	EME2	Control vs JetLag - all samples	LimmaVoom	0.563073	1.82979	0.0571011	0.642623
ENSG00000240445	FOXO3B	Control vs JetLag - all samples	LimmaVoom	0.562852	-0.232665	0.14443	0.736076
ENSG00000162931	TRIM17	Control vs JetLag - all samples	LimmaVoom	0.562778	0.803403	0.0559433	0.641785
ENSG00000205835	GMNC	Control vs JetLag - all samples	LimmaVoom	0.562589	0.0273327	0.154584	0.74282
ENSG00000203883	SOX18	Control vs JetLag - all samples	LimmaVoom	0.562361	-1.58971	0.127635	0.720734
ENSG00000137880	GCHFR	Control vs JetLag - all samples	LimmaVoom	0.562341	-0.754114	0.128749	0.721368
ENSG00000272301	AP002360.4	Control vs JetLag - all samples	LimmaVoom	0.562327	-2.01896	0.0320968	0.585878
ENSG00000163623	NKX6-1	Control vs JetLag - all samples	LimmaVoom	0.562325	0.9034	0.0261776	0.569858
ENSG00000122145	TBX22	Control vs JetLag - all samples	LimmaVoom	0.562238	0.518361	0.116244	0.71201
ENSG00000248685	LINC02484	Control vs JetLag - all samples	LimmaVoom	0.562231	0.00337169	0.141358	0.734212
ENSG00000251050	AC112184.1	Control vs JetLag - all samples	LimmaVoom	0.56213	-2.37366	0.0578844	0.643419
ENSG00000199691	RN7SKP173	Control vs JetLag - all samples	LimmaVoom	0.562108	-1.55943	0.0857269	0.682497
ENSG00000212123	PRR22	Control vs JetLag - all samples	LimmaVoom	0.561942	0.109301	0.108196	0.703917
ENSG00000278972	AC015920.1	Control vs JetLag - all samples	LimmaVoom	0.561836	-2.55853	0.0448956	0.619652
ENSG00000269486	AC011455.2	Control vs JetLag - all samples	LimmaVoom	0.561185	-0.19171	0.104528	0.701736
ENSG00000271926	AC008972.1	Control vs JetLag - all samples	LimmaVoom	0.561083	-2.21635	0.045106	0.620235
ENSG00000256276	AC005186.1	Control vs JetLag - all samples	LimmaVoom	0.560618	-1.89433	0.115538	0.711096
ENSG00000204455	TRIM51BP	Control vs JetLag - all samples	LimmaVoom	0.560502	-1.40345	0.137846	0.730928
ENSG00000213588	ZBTB9	Control vs JetLag - all samples	LimmaVoom	0.560466	-1.47828	0.0875227	0.684523
ENSG00000279500	AC108704.2	Control vs JetLag - all samples	LimmaVoom	0.560466	-0.1311	0.181931	0.768663
ENSG00000201600	RN7SKP124	Control vs JetLag - all samples	LimmaVoom	0.560325	-2.58903	0.0141243	0.512249
ENSG00000019582	CD74	Control vs JetLag - all samples	LimmaVoom	0.560181	-0.99732	0.13773	0.730762
ENSG00000260947	AL356489.2	Control vs JetLag - all samples	LimmaVoom	0.560008	0.0348065	0.0798908	0.674211
ENSG00000162576	MXRA8	Control vs JetLag - all samples	LimmaVoom	0.560002	3.99453	6.69168e-05	0.190008
ENSG00000227076	AL158166.1	Control vs JetLag - all samples	LimmaVoom	0.559774	-0.780494	0.12727	0.720487
ENSG00000062096	ARSF	Control vs JetLag - all samples	LimmaVoom	0.55976	-2.59205	0.00564081	0.426738
ENSG00000170369	CST2	Control vs JetLag - all samples	LimmaVoom	0.559669	-1.9242	0.0929172	0.689024
ENSG00000197530	MIB2	Control vs JetLag - all samples	LimmaVoom	0.559586	3.13327	0.00101879	0.355256
ENSG00000070190	DAPP1	Control vs JetLag - all samples	LimmaVoom	0.559421	-2.66238	0.00598275	0.430933
ENSG00000227706	AL713998.1	Control vs JetLag - all samples	LimmaVoom	0.55933	-2.45775	0.0201915	0.547598
ENSG00000185522	LMNTD2	Control vs JetLag - all samples	LimmaVoom	0.559271	-0.617304	0.192036	0.771634
ENSG00000254929	AL591684.2	Control vs JetLag - all samples	LimmaVoom	0.559142	-2.38958	0.0216904	0.552669
ENSG00000233421	LINC01783	Control vs JetLag - all samples	LimmaVoom	0.558914	-0.796606	0.128006	0.720955
ENSG00000105472	CLEC11A	Control vs JetLag - all samples	LimmaVoom	0.558871	5.75687	0.000233097	0.250579
ENSG00000266928	AC020905.1	Control vs JetLag - all samples	LimmaVoom	0.558687	0.143742	0.0728026	0.667597
ENSG00000160062	ZBTB8A	Control vs JetLag - all samples	LimmaVoom	0.558042	1.23722	0.0823808	0.679688
ENSG00000257058	AP001363.2	Control vs JetLag - all samples	LimmaVoom	0.557987	-2.03998	0.117316	0.713046
ENSG00000084628	NKAIN1	Control vs JetLag - all samples	LimmaVoom	0.55792	-2.37819	0.0322549	0.586184
ENSG00000160472	TMEM190	Control vs JetLag - all samples	LimmaVoom	0.55789	-2.60602	0.0134029	0.508526
ENSG00000137571	SLCO5A1	Control vs JetLag - all samples	LimmaVoom	0.557739	-0.81526	0.129553	0.722612
ENSG00000273680	AC009318.2	Control vs JetLag - all samples	LimmaVoom	0.557696	-1.43631	0.149979	0.74048
ENSG00000273035	AC007684.1	Control vs JetLag - all samples	LimmaVoom	0.557534	-2.2232	0.0644901	0.654456
ENSG00000235268	KDM4E	Control vs JetLag - all samples	LimmaVoom	0.557512	-2.29614	0.0632474	0.652734
ENSG00000235500	SNX19P2	Control vs JetLag - all samples	LimmaVoom	0.556807	-1.91025	0.0731296	0.668239
ENSG00000274767	AC243829.1	Control vs JetLag - all samples	LimmaVoom	0.556691	-0.809822	0.183156	0.768663
ENSG00000242110	AMACR	Control vs JetLag - all samples	LimmaVoom	0.556245	1.82754	0.00381298	0.409311
ENSG00000259378	DCAF13P3	Control vs JetLag - all samples	LimmaVoom	0.555683	-1.46935	0.100537	0.699035
ENSG00000282827	AC134772.2	Control vs JetLag - all samples	LimmaVoom	0.55545	-2.31224	0.0555208	0.640257
ENSG00000188886	ASTL	Control vs JetLag - all samples	LimmaVoom	0.55537	-1.09496	0.146948	0.738388
ENSG00000181790	ADGRB1	Control vs JetLag - all samples	LimmaVoom	0.555282	2.5799	0.0116059	0.489818
ENSG00000250012	AC079848.1	Control vs JetLag - all samples	LimmaVoom	0.555124	-1.62303	0.0816924	0.67768
ENSG00000102854	MSLN	Control vs JetLag - all samples	LimmaVoom	0.55501	1.81588	0.0158507	0.519172
ENSG00000182545	RNASE10	Control vs JetLag - all samples	LimmaVoom	0.554607	-1.70222	0.131302	0.724432
ENSG00000260634	AC012508.2	Control vs JetLag - all samples	LimmaVoom	0.554591	-0.0644253	0.0506094	0.630907
ENSG00000284693	AL928921.2	Control vs JetLag - all samples	LimmaVoom	0.554376	-1.09708	0.151783	0.741954
ENSG00000279348	AC012513.3	Control vs JetLag - all samples	LimmaVoom	0.554266	0.492311	0.0402819	0.604875
ENSG00000259789	AL096869.3	Control vs JetLag - all samples	LimmaVoom	0.553847	-2.1333	0.0900024	0.686253
ENSG00000204946	ZNF783	Control vs JetLag - all samples	LimmaVoom	0.553687	1.30077	0.0106331	0.483657
ENSG00000274290	HIST1H2BE	Control vs JetLag - all samples	LimmaVoom	0.553605	0.197087	0.113326	0.707942
ENSG00000264964	AP001033.1	Control vs JetLag - all samples	LimmaVoom	0.55357	-1.5206	0.0753361	0.668965
ENSG00000237731	RNGTTP1	Control vs JetLag - all samples	LimmaVoom	0.553507	-1.96169	0.07283	0.667654
ENSG00000079313	REXO1	Control vs JetLag - all samples	LimmaVoom	0.553489	0.845292	0.0322019	0.586184
ENSG00000273576	AC009283.1	Control vs JetLag - all samples	LimmaVoom	0.553035	-1.89283	0.066954	0.657134
ENSG00000175592	FOSL1	Control vs JetLag - all samples	LimmaVoom	0.552938	1.26109	0.0717688	0.665476
ENSG00000226067	LINC00623	Control vs JetLag - all samples	LimmaVoom	0.552898	0.945538	0.0479963	0.626169
ENSG00000261618	AC083837.1	Control vs JetLag - all samples	LimmaVoom	0.551667	-2.00058	0.0820237	0.67858
ENSG00000273350	AC004832.5	Control vs JetLag - all samples	LimmaVoom	0.551662	-2.13908	0.129802	0.723075
ENSG00000128710	HOXD10	Control vs JetLag - all samples	LimmaVoom	0.551437	-1.96694	0.120371	0.714388
ENSG00000159733	ZFYVE28	Control vs JetLag - all samples	LimmaVoom	0.551243	-2.483	0.0209821	0.551725
ENSG00000169221	TBC1D10B	Control vs JetLag - all samples	LimmaVoom	0.551132	3.34258	0.0163285	0.524563
ENSG00000274341	AC005899.6	Control vs JetLag - all samples	LimmaVoom	0.55102	-2.38396	0.0132087	0.507547
ENSG00000234883	MIR155HG	Control vs JetLag - all samples	LimmaVoom	0.550865	-2.32914	0.0403636	0.604875
ENSG00000108849	PPY	Control vs JetLag - all samples	LimmaVoom	0.550712	-2.53783	0.0132309	0.507547
ENSG00000239288	AC063923.1	Control vs JetLag - all samples	LimmaVoom	0.549963	-2.16624	0.111114	0.707512
ENSG00000183032	SLC25A21	Control vs JetLag - all samples	LimmaVoom	0.549765	1.20148	0.0788788	0.672871
ENSG00000224126	AC026271.2	Control vs JetLag - all samples	LimmaVoom	0.549442	-2.52693	0.0112082	0.484806
ENSG00000115556	PLCD4	Control vs JetLag - all samples	LimmaVoom	0.549434	-1.17669	0.189295	0.770184
ENSG00000164037	SLC9B1	Control vs JetLag - all samples	LimmaVoom	0.549371	-1.23283	0.160528	0.746484
ENSG00000105695	MAG	Control vs JetLag - all samples	LimmaVoom	0.549253	-1.64887	0.162542	0.74898
ENSG00000251138	AC090502.1	Control vs JetLag - all samples	LimmaVoom	0.548964	-0.608329	0.117062	0.712746
ENSG00000214534	ZNF705E	Control vs JetLag - all samples	LimmaVoom	0.548941	-1.953	0.0968006	0.694788
ENSG00000177030	DEAF1	Control vs JetLag - all samples	LimmaVoom	0.548715	2.84306	0.00207567	0.373334
ENSG00000229119	AC026403.1	Control vs JetLag - all samples	LimmaVoom	0.548705	-1.16128	0.103916	0.701736
ENSG00000165887	ANKRD2	Control vs JetLag - all samples	LimmaVoom	0.548675	-2.04923	0.103598	0.701736
ENSG00000279236	AC064801.2	Control vs JetLag - all samples	LimmaVoom	0.547696	-1.88806	0.117534	0.713046
ENSG00000179168	GGN	Control vs JetLag - all samples	LimmaVoom	0.54737	-0.807682	0.190244	0.770338
ENSG00000280710	AL139035.1	Control vs JetLag - all samples	LimmaVoom	0.547363	-1.56613	0.116403	0.712111
ENSG00000167680	SEMA6B	Control vs JetLag - all samples	LimmaVoom	0.547245	5.73788	0.00294998	0.391214
ENSG00000134780	DAGLA	Control vs JetLag - all samples	LimmaVoom	0.547228	1.73194	0.0380096	0.599332
ENSG00000215769	ARHGAP27P1-BPTFP1-KPNA2P3	Control vs JetLag - all samples	LimmaVoom	0.547195	-1.27087	0.17252	0.759896
ENSG00000099617	EFNA2	Control vs JetLag - all samples	LimmaVoom	0.54709	-1.08256	0.138535	0.730977
ENSG00000271447	MMP28	Control vs JetLag - all samples	LimmaVoom	0.547066	-2.1306	0.0958692	0.693701
ENSG00000230530	LIMD1-AS1	Control vs JetLag - all samples	LimmaVoom	0.546872	-0.706329	0.164107	0.750986
ENSG00000229589	ACVR2B-AS1	Control vs JetLag - all samples	LimmaVoom	0.546318	0.490941	0.0489893	0.628486
ENSG00000234825	XRCC6P2	Control vs JetLag - all samples	LimmaVoom	0.545402	-1.46899	0.0998217	0.698408
ENSG00000185433	LINC00158	Control vs JetLag - all samples	LimmaVoom	0.545322	-1.38026	0.137421	0.730548
ENSG00000248542	AC233724.5	Control vs JetLag - all samples	LimmaVoom	0.544992	-2.46642	0.0230428	0.558127
ENSG00000132361	CLUH	Control vs JetLag - all samples	LimmaVoom	0.54489	3.74695	0.00498821	0.421248
ENSG00000254369	HOXA-AS3	Control vs JetLag - all samples	LimmaVoom	0.544768	-2.02504	0.0470292	0.62459
ENSG00000260475	AL353719.1	Control vs JetLag - all samples	LimmaVoom	0.544719	0.355924	0.0930554	0.689327
ENSG00000173898	SPTBN2	Control vs JetLag - all samples	LimmaVoom	0.544466	2.00489	0.131847	0.725315
ENSG00000245750	DRAIC	Control vs JetLag - all samples	LimmaVoom	0.544045	-1.15007	0.186981	0.76871
ENSG00000260878	AC104072.1	Control vs JetLag - all samples	LimmaVoom	0.543731	-1.68681	0.0990176	0.69794
ENSG00000239696	AC092104.1	Control vs JetLag - all samples	LimmaVoom	0.543475	-2.37119	0.0199161	0.54447
ENSG00000176909	MAMSTR	Control vs JetLag - all samples	LimmaVoom	0.543436	0.292891	0.0332356	0.589309
ENSG00000235629	AC090952.1	Control vs JetLag - all samples	LimmaVoom	0.543331	-2.2161	0.0656128	0.656308
ENSG00000159263	SIM2	Control vs JetLag - all samples	LimmaVoom	0.54322	0.707491	0.0738312	0.668775
ENSG00000262576	PCDHGA4	Control vs JetLag - all samples	LimmaVoom	0.543123	-0.0837616	0.0715485	0.665476
ENSG00000162591	MEGF6	Control vs JetLag - all samples	LimmaVoom	0.543048	0.564566	0.0952834	0.693194
ENSG00000109705	NKX3-2	Control vs JetLag - all samples	LimmaVoom	0.542852	2.413	0.0038136	0.409311
ENSG00000119715	ESRRB	Control vs JetLag - all samples	LimmaVoom	0.542826	-0.0355597	0.0744681	0.668775
ENSG00000260231	JHDM1D-AS1	Control vs JetLag - all samples	LimmaVoom	0.542574	1.26307	0.00623967	0.43469
ENSG00000123496	IL13RA2	Control vs JetLag - all samples	LimmaVoom	0.542438	-0.787207	0.157273	0.743444
ENSG00000183479	TREX2	Control vs JetLag - all samples	LimmaVoom	0.54242	-2.04598	0.12214	0.715547
ENSG00000106538	RARRES2	Control vs JetLag - all samples	LimmaVoom	0.54223	1.59642	0.0144078	0.512249
ENSG00000178718	RPP25	Control vs JetLag - all samples	LimmaVoom	0.542229	0.213494	0.0837082	0.682116
ENSG00000140406	TLNRD1	Control vs JetLag - all samples	LimmaVoom	0.542191	4.43206	0.00156062	0.368004
ENSG00000268941	LINC01711	Control vs JetLag - all samples	LimmaVoom	0.542185	2.57322	0.00949244	0.473974
ENSG00000129214	SHBG	Control vs JetLag - all samples	LimmaVoom	0.541925	-2.03419	0.0989105	0.697694
ENSG00000259438	AC090970.2	Control vs JetLag - all samples	LimmaVoom	0.541865	-1.77574	0.0904254	0.686275
ENSG00000182968	SOX1	Control vs JetLag - all samples	LimmaVoom	0.541806	-2.4566	0.0196846	0.54447
ENSG00000278743	AC087239.1	Control vs JetLag - all samples	LimmaVoom	0.541362	-0.0462905	0.067597	0.659504
ENSG00000257507	LINC02373	Control vs JetLag - all samples	LimmaVoom	0.541246	-1.81095	0.123652	0.716434
ENSG00000251216	AC106895.2	Control vs JetLag - all samples	LimmaVoom	0.541125	-1.07736	0.133327	0.725802
ENSG00000167182	SP2	Control vs JetLag - all samples	LimmaVoom	0.541017	-1.38195	0.164344	0.751404
ENSG00000261857	MIA	Control vs JetLag - all samples	LimmaVoom	0.540239	0.970038	0.097752	0.697395
ENSG00000162723	SLAMF9	Control vs JetLag - all samples	LimmaVoom	0.540217	-1.66401	0.155716	0.743062
ENSG00000186193	SAPCD2	Control vs JetLag - all samples	LimmaVoom	0.540191	4.53809	0.00276485	0.378484
ENSG00000279114	Z99129.3	Control vs JetLag - all samples	LimmaVoom	0.539829	-2.13207	0.0774869	0.671602
ENSG00000214820	MPRIPP1	Control vs JetLag - all samples	LimmaVoom	0.53953	-0.797485	0.150915	0.740927
ENSG00000100385	IL2RB	Control vs JetLag - all samples	LimmaVoom	0.53943	2.35248	0.0214919	0.552669
ENSG00000196843	ARID5A	Control vs JetLag - all samples	LimmaVoom	0.539361	2.09241	0.0766764	0.670268
ENSG00000250151	ARPC4-TTLL3	Control vs JetLag - all samples	LimmaVoom	0.53924	-0.184465	0.103443	0.70161
ENSG00000165655	ZNF503	Control vs JetLag - all samples	LimmaVoom	0.539148	2.84054	0.00245523	0.378125
ENSG00000273084	AC092171.5	Control vs JetLag - all samples	LimmaVoom	0.539139	-1.0672	0.134385	0.72676
ENSG00000161133	USP41	Control vs JetLag - all samples	LimmaVoom	0.538903	-1.59428	0.155968	0.743062
ENSG00000152292	SH2D6	Control vs JetLag - all samples	LimmaVoom	0.538851	0.00651994	0.134216	0.726541
ENSG00000064547	LPAR2	Control vs JetLag - all samples	LimmaVoom	0.538828	-2.2418	0.0778789	0.671864
ENSG00000283646	LINC02009	Control vs JetLag - all samples	LimmaVoom	0.53842	1.33071	0.00897907	0.462233
ENSG00000126461	SCAF1	Control vs JetLag - all samples	LimmaVoom	0.53836	1.01851	0.0734286	0.668775
ENSG00000070047	PHRF1	Control vs JetLag - all samples	LimmaVoom	0.538171	3.21014	0.00310203	0.395735
ENSG00000235183	AC015795.1	Control vs JetLag - all samples	LimmaVoom	0.53758	-1.5287	0.137644	0.730704
ENSG00000196167	COLCA1	Control vs JetLag - all samples	LimmaVoom	0.537149	0.847057	0.0566669	0.642623
ENSG00000270761	AL355353.1	Control vs JetLag - all samples	LimmaVoom	0.537146	-0.487959	0.0889529	0.685959
ENSG00000131187	F12	Control vs JetLag - all samples	LimmaVoom	0.536755	2.31881	0.0210169	0.551846
ENSG00000166007	TRIM51HP	Control vs JetLag - all samples	LimmaVoom	0.536473	-1.82231	0.0794132	0.672919
ENSG00000120337	TNFSF18	Control vs JetLag - all samples	LimmaVoom	0.53643	-1.40412	0.197121	0.774752
ENSG00000138944	KIAA1644	Control vs JetLag - all samples	LimmaVoom	0.536258	1.53124	0.0226884	0.554893
ENSG00000279652	Z82217.1	Control vs JetLag - all samples	LimmaVoom	0.536208	-1.95649	0.0928495	0.689024
ENSG00000170214	ADRA1B	Control vs JetLag - all samples	LimmaVoom	0.536091	1.95287	0.0678089	0.659504
ENSG00000170049	KCNAB3	Control vs JetLag - all samples	LimmaVoom	0.536078	-0.65113	0.138312	0.730977
ENSG00000259462	CPEB1-AS1	Control vs JetLag - all samples	LimmaVoom	0.535838	-1.24031	0.14756	0.738435
ENSG00000162873	KLHDC8A	Control vs JetLag - all samples	LimmaVoom	0.535248	1.82827	0.081129	0.676229
ENSG00000248238	LINC02438	Control vs JetLag - all samples	LimmaVoom	0.53522	-0.433354	0.11843	0.714011
ENSG00000245888	FLJ21408	Control vs JetLag - all samples	LimmaVoom	0.535073	-0.249141	0.0451172	0.620235
ENSG00000237664	LINC00316	Control vs JetLag - all samples	LimmaVoom	0.535025	-2.42347	0.100738	0.699035
ENSG00000258472	AC005726.2	Control vs JetLag - all samples	LimmaVoom	0.534978	-1.82087	0.147207	0.738435
ENSG00000196275	GTF2IRD2	Control vs JetLag - all samples	LimmaVoom	0.534561	-0.518071	0.117146	0.712904
ENSG00000154451	GBP5	Control vs JetLag - all samples	LimmaVoom	0.534261	-0.488988	0.11077	0.707512
ENSG00000140939	NOL3	Control vs JetLag - all samples	LimmaVoom	0.534208	3.12734	0.00037494	0.28927
ENSG00000265340	OR4K7P	Control vs JetLag - all samples	LimmaVoom	0.534132	-2.54293	0.014437	0.512249
ENSG00000179776	CDH5	Control vs JetLag - all samples	LimmaVoom	0.533999	-0.833529	0.167131	0.754493
ENSG00000263612	AF186192.3	Control vs JetLag - all samples	LimmaVoom	0.533967	-0.598458	0.175427	0.761835
ENSG00000253704	AC023632.2	Control vs JetLag - all samples	LimmaVoom	0.533853	-1.59798	0.18468	0.768663
ENSG00000083838	ZNF446	Control vs JetLag - all samples	LimmaVoom	0.533372	1.94113	0.0153097	0.519172
ENSG00000174125	TLR1	Control vs JetLag - all samples	LimmaVoom	0.533312	1.10613	0.0790545	0.672871
ENSG00000278017	AC064801.1	Control vs JetLag - all samples	LimmaVoom	0.533181	-1.93791	0.188485	0.769402
ENSG00000284292	AC004922.1	Control vs JetLag - all samples	LimmaVoom	0.532961	-1.36336	0.152687	0.741954
ENSG00000249637	AC008438.1	Control vs JetLag - all samples	LimmaVoom	0.532828	-1.28076	0.10795	0.703793
ENSG00000128283	CDC42EP1	Control vs JetLag - all samples	LimmaVoom	0.532824	3.73216	0.00310563	0.395735
ENSG00000279133	AC018628.1	Control vs JetLag - all samples	LimmaVoom	0.53282	-0.478836	0.180793	0.767555
ENSG00000176746	MAGEB6	Control vs JetLag - all samples	LimmaVoom	0.532732	-2.55465	0.0142947	0.512249
ENSG00000249965	CDC42P4	Control vs JetLag - all samples	LimmaVoom	0.532566	-2.43643	0.0478773	0.626169
ENSG00000283635	AC012485.3	Control vs JetLag - all samples	LimmaVoom	0.532448	-1.32909	0.124981	0.717907
ENSG00000203288	TDRKH-AS1	Control vs JetLag - all samples	LimmaVoom	0.53236	-2.02671	0.121399	0.715301
ENSG00000157322	CLEC18A	Control vs JetLag - all samples	LimmaVoom	0.532078	-2.16192	0.0452409	0.620264
ENSG00000101463	SYNDIG1	Control vs JetLag - all samples	LimmaVoom	0.532026	-1.21667	0.142468	0.735038
ENSG00000129932	DOHH	Control vs JetLag - all samples	LimmaVoom	0.531543	2.98197	0.00710587	0.440206
ENSG00000221869	CEBPD	Control vs JetLag - all samples	LimmaVoom	0.531527	5.03833	0.0021009	0.373334
ENSG00000249776	AC124854.1	Control vs JetLag - all samples	LimmaVoom	0.531128	-1.23049	0.192907	0.771634
ENSG00000130589	HELZ2	Control vs JetLag - all samples	LimmaVoom	0.531103	3.97772	0.00374855	0.409311
ENSG00000081189	MEF2C	Control vs JetLag - all samples	LimmaVoom	0.53105	1.37817	0.00568262	0.426738
ENSG00000232894	MRPS31P2	Control vs JetLag - all samples	LimmaVoom	0.531013	-2.45103	0.0234168	0.559082
ENSG00000230506	AL354824.1	Control vs JetLag - all samples	LimmaVoom	0.530687	-2.25371	0.047637	0.626128
ENSG00000257702	LBX2-AS1	Control vs JetLag - all samples	LimmaVoom	0.530364	2.26694	0.00483243	0.421248
ENSG00000188013	AC087499.1	Control vs JetLag - all samples	LimmaVoom	0.530106	1.81874	0.00456319	0.418145
ENSG00000103723	AP3B2	Control vs JetLag - all samples	LimmaVoom	0.529977	-0.538567	0.164244	0.751381
ENSG00000160117	ANKLE1	Control vs JetLag - all samples	LimmaVoom	0.529952	-2.32038	0.0539384	0.636173
ENSG00000255690	TRIL	Control vs JetLag - all samples	LimmaVoom	0.52991	3.23294	0.00638613	0.435472
ENSG00000121335	PRB2	Control vs JetLag - all samples	LimmaVoom	0.529793	-2.10542	0.0894929	0.685959
ENSG00000248727	LINC01948	Control vs JetLag - all samples	LimmaVoom	0.529526	-2.22981	0.101343	0.69933
ENSG00000213061	PFN1P11	Control vs JetLag - all samples	LimmaVoom	0.529399	-2.46411	0.0160291	0.520594
ENSG00000178464	RPL10P16	Control vs JetLag - all samples	LimmaVoom	0.529237	0.73632	0.0669489	0.657134
ENSG00000270196	AC007255.2	Control vs JetLag - all samples	LimmaVoom	0.529103	-2.26988	0.116691	0.712386
ENSG00000254887	AC010247.1	Control vs JetLag - all samples	LimmaVoom	0.528972	-2.40712	0.0203725	0.547747
ENSG00000108821	COL1A1	Control vs JetLag - all samples	LimmaVoom	0.528495	4.96846	0.0169664	0.527946
ENSG00000240895	AC117430.1	Control vs JetLag - all samples	LimmaVoom	0.528272	-2.4732	0.0491914	0.629545
ENSG00000213598	AL049873.1	Control vs JetLag - all samples	LimmaVoom	0.527324	-1.28856	0.0812604	0.676534
ENSG00000132911	NMUR2	Control vs JetLag - all samples	LimmaVoom	0.527285	0.109105	0.0993508	0.698295
ENSG00000161642	ZNF385A	Control vs JetLag - all samples	LimmaVoom	0.527027	-1.48108	0.10735	0.703544
ENSG00000240207	AC080013.1	Control vs JetLag - all samples	LimmaVoom	0.526928	-0.666536	0.104276	0.701736
ENSG00000127666	TICAM1	Control vs JetLag - all samples	LimmaVoom	0.526865	-0.0586095	0.113596	0.707942
ENSG00000188133	TMEM215	Control vs JetLag - all samples	LimmaVoom	0.52668	-0.215675	0.187698	0.768754
ENSG00000161618	ALDH16A1	Control vs JetLag - all samples	LimmaVoom	0.526678	4.72119	0.00049743	0.298684
ENSG00000187244	BCAM	Control vs JetLag - all samples	LimmaVoom	0.526601	5.8053	0.00524773	0.423029
ENSG00000181143	MUC16	Control vs JetLag - all samples	LimmaVoom	0.526262	-1.90979	0.131669	0.724987
ENSG00000239556	AC004951.2	Control vs JetLag - all samples	LimmaVoom	0.52614	-1.95131	0.111129	0.707512
ENSG00000125650	PSPN	Control vs JetLag - all samples	LimmaVoom	0.526076	0.659793	0.146232	0.737074
ENSG00000276085	CCL3L3	Control vs JetLag - all samples	LimmaVoom	0.525982	-0.716844	0.217033	0.790052
ENSG00000105383	CD33	Control vs JetLag - all samples	LimmaVoom	0.525097	-1.32098	0.191302	0.77124
ENSG00000198406	BZW1P2	Control vs JetLag - all samples	LimmaVoom	0.525061	-0.0315577	0.0943023	0.691496
ENSG00000005513	SOX8	Control vs JetLag - all samples	LimmaVoom	0.524975	2.86494	0.0369344	0.597038
ENSG00000275576	AL049539.1	Control vs JetLag - all samples	LimmaVoom	0.524974	-2.29186	0.0658525	0.656683
ENSG00000242550	SERPINB10	Control vs JetLag - all samples	LimmaVoom	0.52486	-2.56797	0.0167838	0.526713
ENSG00000170909	OSCAR	Control vs JetLag - all samples	LimmaVoom	0.524539	-0.234864	0.148369	0.738762
ENSG00000225128	LINC00972	Control vs JetLag - all samples	LimmaVoom	0.524526	-2.59467	0.0063448	0.434764
ENSG00000244459	AC147067.1	Control vs JetLag - all samples	LimmaVoom	0.524488	-1.75107	0.148745	0.739655
ENSG00000261056	AC079416.1	Control vs JetLag - all samples	LimmaVoom	0.52447	-0.61424	0.178299	0.765762
ENSG00000244675	AC108676.1	Control vs JetLag - all samples	LimmaVoom	0.523969	-0.672987	0.186495	0.76871
ENSG00000249790	AC092490.1	Control vs JetLag - all samples	LimmaVoom	0.523967	-1.47617	0.111891	0.707512
ENSG00000124664	SPDEF	Control vs JetLag - all samples	LimmaVoom	0.523646	-0.141598	0.166245	0.753128
ENSG00000258385	AL391516.1	Control vs JetLag - all samples	LimmaVoom	0.523506	-1.98933	0.136867	0.729493
ENSG00000177494	ZBED2	Control vs JetLag - all samples	LimmaVoom	0.523506	0.81833	0.0329381	0.589309
ENSG00000173638	SLC19A1	Control vs JetLag - all samples	LimmaVoom	0.523396	3.43705	0.000574304	0.308073
ENSG00000121410	A1BG	Control vs JetLag - all samples	LimmaVoom	0.522671	-1.01678	0.141647	0.734666
ENSG00000204969	PCDHA2	Control vs JetLag - all samples	LimmaVoom	0.522414	-1.85547	0.201077	0.77608
ENSG00000280332	AC020917.4	Control vs JetLag - all samples	LimmaVoom	0.521915	-2.15706	0.0825087	0.679725
ENSG00000147883	CDKN2B	Control vs JetLag - all samples	LimmaVoom	0.521587	2.23682	0.016875	0.526713
ENSG00000187288	CIDEC	Control vs JetLag - all samples	LimmaVoom	0.521518	-1.9426	0.111348	0.707512
ENSG00000164116	GUCY1A3	Control vs JetLag - all samples	LimmaVoom	0.521495	-0.433247	0.0668833	0.657134
ENSG00000273238	AC116565.1	Control vs JetLag - all samples	LimmaVoom	0.521045	0.581045	0.113586	0.707942
ENSG00000121931	LRIF1	Control vs JetLag - all samples	LimmaVoom	0.520995	-2.41818	0.0603179	0.650259
ENSG00000277440	AC012676.4	Control vs JetLag - all samples	LimmaVoom	0.520749	-2.40159	0.0478688	0.626169
ENSG00000259891	AC107375.1	Control vs JetLag - all samples	LimmaVoom	0.520263	-0.668228	0.15843	0.744566
ENSG00000279140	AL590326.2	Control vs JetLag - all samples	LimmaVoom	0.520083	-1.89697	0.109497	0.705435
ENSG00000114124	GRK7	Control vs JetLag - all samples	LimmaVoom	0.519824	-2.54575	0.0140597	0.512249
ENSG00000167685	ZNF444	Control vs JetLag - all samples	LimmaVoom	0.519755	2.85282	0.00138918	0.361136
ENSG00000271895	AL109811.3	Control vs JetLag - all samples	LimmaVoom	0.51939	-0.53427	0.0980709	0.697396
ENSG00000107099	DOCK8	Control vs JetLag - all samples	LimmaVoom	0.519246	0.647701	0.0940401	0.691165
ENSG00000125534	PPDPF	Control vs JetLag - all samples	LimmaVoom	0.518917	2.73397	0.00185341	0.37003
ENSG00000231066	NPM1P9	Control vs JetLag - all samples	LimmaVoom	0.51886	-1.66501	0.160581	0.746484
ENSG00000163817	SLC6A20	Control vs JetLag - all samples	LimmaVoom	0.518709	1.84797	0.064189	0.653931
ENSG00000255052	FAM66D	Control vs JetLag - all samples	LimmaVoom	0.518611	-0.838448	0.219737	0.791031
ENSG00000214725	CDIPT-AS1	Control vs JetLag - all samples	LimmaVoom	0.518343	-1.82944	0.154896	0.742907
ENSG00000144485	HES6	Control vs JetLag - all samples	LimmaVoom	0.518265	1.52368	0.0359734	0.595993
ENSG00000272419	AC241585.2	Control vs JetLag - all samples	LimmaVoom	0.51757	0.247439	0.0494006	0.629734
ENSG00000156206	CFAP161	Control vs JetLag - all samples	LimmaVoom	0.517547	-1.92245	0.148932	0.739701
ENSG00000215029	TCP11X2	Control vs JetLag - all samples	LimmaVoom	0.517538	-2.0456	0.13141	0.724657
ENSG00000108798	ABI3	Control vs JetLag - all samples	LimmaVoom	0.517261	0.811608	0.0906377	0.68645
ENSG00000260924	LINC01311	Control vs JetLag - all samples	LimmaVoom	0.51711	1.82373	0.00150764	0.361136
ENSG00000235621	LINC00494	Control vs JetLag - all samples	LimmaVoom	0.51702	-2.25771	0.0899349	0.686253
ENSG00000232185	CNOT7P2	Control vs JetLag - all samples	LimmaVoom	0.516953	-2.64904	0.00858848	0.459338
ENSG00000110628	SLC22A18	Control vs JetLag - all samples	LimmaVoom	0.516887	3.42806	0.00434871	0.418145
ENSG00000163898	LIPH	Control vs JetLag - all samples	LimmaVoom	0.516814	-1.25487	0.190247	0.770338
ENSG00000149328	GLB1L2	Control vs JetLag - all samples	LimmaVoom	0.516682	-1.26171	0.146839	0.738388
ENSG00000112530	PACRG	Control vs JetLag - all samples	LimmaVoom	0.516521	-1.17322	0.136691	0.729242
ENSG00000247595	SPTY2D1-AS1	Control vs JetLag - all samples	LimmaVoom	0.516461	1.13154	0.0214816	0.552669
ENSG00000108823	SGCA	Control vs JetLag - all samples	LimmaVoom	0.516218	-2.07878	0.0812903	0.676534
ENSG00000256338	RPL41P2	Control vs JetLag - all samples	LimmaVoom	0.516169	-0.844792	0.128492	0.72113
ENSG00000245812	LINC02202	Control vs JetLag - all samples	LimmaVoom	0.51597	-1.31979	0.222644	0.791567
ENSG00000269894	AC018809.1	Control vs JetLag - all samples	LimmaVoom	0.515711	-1.57013	0.15315	0.741954
ENSG00000105298	CACTIN	Control vs JetLag - all samples	LimmaVoom	0.51559	3.00212	0.00891372	0.460944
ENSG00000280670	CCDC163	Control vs JetLag - all samples	LimmaVoom	0.515311	1.66824	0.100436	0.699035
ENSG00000171223	JUNB	Control vs JetLag - all samples	LimmaVoom	0.515169	5.43843	0.000150626	0.220215
ENSG00000280018	CU634019.6	Control vs JetLag - all samples	LimmaVoom	0.515154	-2.05429	0.0975273	0.696487
ENSG00000185100	ADSSL1	Control vs JetLag - all samples	LimmaVoom	0.514931	1.73715	0.0463997	0.622626
ENSG00000229167	AC114488.1	Control vs JetLag - all samples	LimmaVoom	0.51481	-2.13473	0.11144	0.707512
ENSG00000236153	AC104076.1	Control vs JetLag - all samples	LimmaVoom	0.514794	-1.79098	0.141626	0.734666
ENSG00000263905	RN7SL555P	Control vs JetLag - all samples	LimmaVoom	0.514724	-0.978659	0.155766	0.743062
ENSG00000166707	ZCCHC18	Control vs JetLag - all samples	LimmaVoom	0.514676	0.813469	0.101653	0.69969
ENSG00000100218	RSPH14	Control vs JetLag - all samples	LimmaVoom	0.514653	-1.71009	0.196604	0.774054
ENSG00000237125	HAND2-AS1	Control vs JetLag - all samples	LimmaVoom	0.514625	-2.25137	0.069943	0.66232
ENSG00000233608	TWIST2	Control vs JetLag - all samples	LimmaVoom	0.514349	1.57541	0.0299312	0.584514
ENSG00000134757	DSG3	Control vs JetLag - all samples	LimmaVoom	0.514342	-2.56863	0.0295834	0.583911
ENSG00000142173	COL6A2	Control vs JetLag - all samples	LimmaVoom	0.514257	5.99331	0.00308777	0.395735
ENSG00000204055	AL158151.1	Control vs JetLag - all samples	LimmaVoom	0.514094	-0.837497	0.218947	0.790984
ENSG00000185614	FAM212A	Control vs JetLag - all samples	LimmaVoom	0.513744	-0.841372	0.200501	0.776033
ENSG00000091137	SLC26A4	Control vs JetLag - all samples	LimmaVoom	0.513642	-0.199234	0.126251	0.720305
ENSG00000185681	MORN5	Control vs JetLag - all samples	LimmaVoom	0.513315	-1.64568	0.211999	0.785206
ENSG00000235924	ZNRF2P3	Control vs JetLag - all samples	LimmaVoom	0.513215	-2.30803	0.0589366	0.645518
ENSG00000233273	AMMECR1LP1	Control vs JetLag - all samples	LimmaVoom	0.513065	-2.57625	0.0182689	0.538038
ENSG00000269842	AC011453.1	Control vs JetLag - all samples	LimmaVoom	0.512913	-2.43625	0.0465053	0.622626
ENSG00000198570	RD3	Control vs JetLag - all samples	LimmaVoom	0.512772	-2.09317	0.127653	0.720734
ENSG00000205903	ZNF316	Control vs JetLag - all samples	LimmaVoom	0.512733	3.91802	0.0122155	0.495814
ENSG00000170509	HSD17B13	Control vs JetLag - all samples	LimmaVoom	0.512612	-0.430875	0.124209	0.7175
ENSG00000162482	AKR7A3	Control vs JetLag - all samples	LimmaVoom	0.512218	-2.29647	0.0774385	0.671501
ENSG00000241014	AC114490.1	Control vs JetLag - all samples	LimmaVoom	0.512182	-0.663298	0.146801	0.738388
ENSG00000099864	PALM	Control vs JetLag - all samples	LimmaVoom	0.510996	3.47208	0.0347779	0.592363
ENSG00000165644	COMTD1	Control vs JetLag - all samples	LimmaVoom	0.510871	4.87683	0.00247589	0.378125
ENSG00000166341	DCHS1	Control vs JetLag - all samples	LimmaVoom	0.510812	3.94814	0.00554203	0.426738
ENSG00000176204	LRRTM4	Control vs JetLag - all samples	LimmaVoom	0.510342	-0.522561	0.229907	0.797486
ENSG00000122679	RAMP3	Control vs JetLag - all samples	LimmaVoom	0.510206	-1.75726	0.11139	0.707512
ENSG00000130475	FCHO1	Control vs JetLag - all samples	LimmaVoom	0.510126	0.929115	0.0596124	0.648639
ENSG00000166961	MS4A15	Control vs JetLag - all samples	LimmaVoom	0.510114	-1.86397	0.129101	0.722237
ENSG00000142609	CFAP74	Control vs JetLag - all samples	LimmaVoom	0.509705	-1.6437	0.1631	0.749383
ENSG00000174276	ZNHIT2	Control vs JetLag - all samples	LimmaVoom	0.509625	3.67505	0.00185894	0.37003
ENSG00000277203	F8A1	Control vs JetLag - all samples	LimmaVoom	0.509322	0.370419	0.132882	0.725509
ENSG00000158806	NPM2	Control vs JetLag - all samples	LimmaVoom	0.509298	-2.25236	0.095707	0.693701
ENSG00000182600	C2orf82	Control vs JetLag - all samples	LimmaVoom	0.509077	-1.99671	0.160247	0.746403
ENSG00000260066	AC112176.1	Control vs JetLag - all samples	LimmaVoom	0.509005	-1.22507	0.173761	0.760473
ENSG00000164867	NOS3	Control vs JetLag - all samples	LimmaVoom	0.509004	-0.876623	0.173116	0.760234
ENSG00000175764	TTLL11	Control vs JetLag - all samples	LimmaVoom	0.508875	0.0697141	0.147089	0.738435
ENSG00000178997	EXD1	Control vs JetLag - all samples	LimmaVoom	0.508772	-2.04488	0.122107	0.715547
ENSG00000089847	ANKRD24	Control vs JetLag - all samples	LimmaVoom	0.508663	-1.52351	0.226484	0.79466
ENSG00000249413	AC116049.2	Control vs JetLag - all samples	LimmaVoom	0.508643	-0.0687181	0.100581	0.699035
ENSG00000104901	DKKL1	Control vs JetLag - all samples	LimmaVoom	0.508498	-1.02481	0.156548	0.743129
ENSG00000251459	AC013724.1	Control vs JetLag - all samples	LimmaVoom	0.508482	-2.00671	0.146085	0.736986
ENSG00000258768	AL356019.2	Control vs JetLag - all samples	LimmaVoom	0.508281	-1.49057	0.196271	0.773985
ENSG00000170006	TMEM154	Control vs JetLag - all samples	LimmaVoom	0.508247	1.41643	0.0388372	0.601482
ENSG00000255585	AL590627.1	Control vs JetLag - all samples	LimmaVoom	0.508226	-2.45479	0.0141891	0.512249
ENSG00000153930	ANKFN1	Control vs JetLag - all samples	LimmaVoom	0.50774	-1.39167	0.211949	0.785206
ENSG00000272967	AC073352.2	Control vs JetLag - all samples	LimmaVoom	0.507494	-2.44156	0.0229555	0.557395
ENSG00000220875	HIST1H3PS1	Control vs JetLag - all samples	LimmaVoom	0.507462	-2.40935	0.0728708	0.667693
ENSG00000272482	AC254633.1	Control vs JetLag - all samples	LimmaVoom	0.50731	-2.13167	0.0714369	0.665476
ENSG00000258388	PPT2-EGFL8	Control vs JetLag - all samples	LimmaVoom	0.5073	-1.56262	0.212526	0.785727
ENSG00000261512	AC092368.3	Control vs JetLag - all samples	LimmaVoom	0.507259	0.0606346	0.131169	0.724432
ENSG00000102302	FGD1	Control vs JetLag - all samples	LimmaVoom	0.507235	1.49015	0.0320471	0.585878
ENSG00000204460	LINC01854	Control vs JetLag - all samples	LimmaVoom	0.507111	-1.7926	0.187972	0.769261
ENSG00000243591	RN7SL282P	Control vs JetLag - all samples	LimmaVoom	0.507001	-2.55022	0.018008	0.535631
ENSG00000105963	ADAP1	Control vs JetLag - all samples	LimmaVoom	0.506968	2.18239	0.0274877	0.575083
ENSG00000076864	RAP1GAP	Control vs JetLag - all samples	LimmaVoom	0.50696	1.46876	0.085257	0.682116
ENSG00000235370	DNM1P51	Control vs JetLag - all samples	LimmaVoom	0.506887	-1.61858	0.138276	0.730977
ENSG00000249129	SUDS3P1	Control vs JetLag - all samples	LimmaVoom	0.506367	-1.33822	0.171957	0.75897
ENSG00000065989	PDE4A	Control vs JetLag - all samples	LimmaVoom	0.506349	1.13382	0.0584531	0.645307
ENSG00000265702	AC005821.1	Control vs JetLag - all samples	LimmaVoom	0.505993	-2.42838	0.0558332	0.640724
ENSG00000236656	AL365440.2	Control vs JetLag - all samples	LimmaVoom	0.505941	-2.55604	0.01981	0.54447
ENSG00000143333	RGS16	Control vs JetLag - all samples	LimmaVoom	0.505878	0.784846	0.0573855	0.643329
ENSG00000168453	HR	Control vs JetLag - all samples	LimmaVoom	0.505866	4.86824	0.004277	0.418145
ENSG00000106992	AK1	Control vs JetLag - all samples	LimmaVoom	0.505864	1.96709	0.0101709	0.483657
ENSG00000068078	FGFR3	Control vs JetLag - all samples	LimmaVoom	0.505863	0.956186	0.0966373	0.694666
ENSG00000213221	DNLZ	Control vs JetLag - all samples	LimmaVoom	0.505682	-0.354187	0.120037	0.714388
ENSG00000251237	B3GNTL1P1	Control vs JetLag - all samples	LimmaVoom	0.505526	-2.39882	0.0263047	0.571102
ENSG00000070731	ST6GALNAC2	Control vs JetLag - all samples	LimmaVoom	0.50516	-2.57702	0.016843	0.526713
ENSG00000110975	SYT10	Control vs JetLag - all samples	LimmaVoom	0.505069	-0.455317	0.151004	0.740927
ENSG00000183780	SLC35F3	Control vs JetLag - all samples	LimmaVoom	0.504915	1.8726	0.127218	0.720487
ENSG00000155265	GOLGA7B	Control vs JetLag - all samples	LimmaVoom	0.504835	-1.79033	0.195676	0.773407
ENSG00000274976	AC087588.2	Control vs JetLag - all samples	LimmaVoom	0.504535	-1.137	0.142632	0.735038
ENSG00000180245	RRH	Control vs JetLag - all samples	LimmaVoom	0.504425	-2.37279	0.104145	0.701736
ENSG00000188981	MSANTD1	Control vs JetLag - all samples	LimmaVoom	0.5041	-1.53587	0.139845	0.733191
ENSG00000110881	ASIC1	Control vs JetLag - all samples	LimmaVoom	0.503974	0.630738	0.176697	0.763893
ENSG00000108001	EBF3	Control vs JetLag - all samples	LimmaVoom	0.503888	-0.296166	0.142013	0.734897
ENSG00000275542	AC027601.3	Control vs JetLag - all samples	LimmaVoom	0.503848	-1.24531	0.139657	0.732871
ENSG00000087116	ADAMTS2	Control vs JetLag - all samples	LimmaVoom	0.503718	1.71022	0.0260141	0.568157
ENSG00000225138	SLC9A3-AS1	Control vs JetLag - all samples	LimmaVoom	0.503638	1.78052	0.0125198	0.499087
ENSG00000230928	AL139241.1	Control vs JetLag - all samples	LimmaVoom	0.503411	-2.47708	0.0463017	0.622626
ENSG00000100346	CACNA1I	Control vs JetLag - all samples	LimmaVoom	0.503284	0.0740272	0.114677	0.710058
ENSG00000199683	RN7SKP185	Control vs JetLag - all samples	LimmaVoom	0.503161	-2.47844	0.0448815	0.619652
ENSG00000106246	PTCD1	Control vs JetLag - all samples	LimmaVoom	0.503084	1.68593	0.0243092	0.561875
ENSG00000059122	FLYWCH1	Control vs JetLag - all samples	LimmaVoom	0.502583	3.84139	0.00878952	0.460944
ENSG00000110046	ATG2A	Control vs JetLag - all samples	LimmaVoom	0.502097	2.85372	0.000880689	0.34807
ENSG00000241360	PDXP	Control vs JetLag - all samples	LimmaVoom	0.50206	-0.666727	0.133142	0.725509
ENSG00000186174	BCL9L	Control vs JetLag - all samples	LimmaVoom	0.501963	1.92258	0.0113946	0.489193
ENSG00000170604	IRF2BP1	Control vs JetLag - all samples	LimmaVoom	0.501947	4.75879	0.00127969	0.361136
ENSG00000259717	LINC00677	Control vs JetLag - all samples	LimmaVoom	0.501814	-2.46273	0.0675135	0.65937
ENSG00000181523	SGSH	Control vs JetLag - all samples	LimmaVoom	0.501718	2.92339	0.00990133	0.480958
ENSG00000197106	SLC6A17	Control vs JetLag - all samples	LimmaVoom	0.501444	-2.09727	0.112509	0.707512
ENSG00000213740	SERBP1P1	Control vs JetLag - all samples	LimmaVoom	0.501384	-2.01126	0.122363	0.715558
ENSG00000282222	AC073488.4	Control vs JetLag - all samples	LimmaVoom	0.501334	-2.75739	0.00268733	0.378125
ENSG00000105429	MEGF8	Control vs JetLag - all samples	LimmaVoom	0.501309	3.58722	0.0010497	0.355256
ENSG00000283696	AL592295.4	Control vs JetLag - all samples	LimmaVoom	0.501179	-2.1218	0.155066	0.742907
ENSG00000188542	DUSP28	Control vs JetLag - all samples	LimmaVoom	0.501166	2.97515	0.00141209	0.361136
ENSG00000159958	TNFRSF13C	Control vs JetLag - all samples	LimmaVoom	0.500986	-1.62726	0.170955	0.757694
ENSG00000227817	ARHGAP42P1	Control vs JetLag - all samples	LimmaVoom	0.500977	-2.5599	0.0257229	0.566365
ENSG00000161944	ASGR2	Control vs JetLag - all samples	LimmaVoom	0.500735	-1.9436	0.110212	0.706486
ENSG00000279267	AL078621.3	Control vs JetLag - all samples	LimmaVoom	0.500545	-0.700906	0.155852	0.743062
ENSG00000254067	AC123767.1	Control vs JetLag - all samples	LimmaVoom	0.500493	-2.52655	0.116992	0.712647
ENSG00000228302	AL512770.1	Control vs JetLag - all samples	LimmaVoom	0.500292	-1.98723	0.0791277	0.672919
ENSG00000197245	FAM110D	Control vs JetLag - all samples	LimmaVoom	0.500158	0.773333	0.0577421	0.643419
ENSG00000117480	FAAH	Control vs JetLag - all samples	LimmaVoom	0.500061	-0.245538	0.13585	0.728263
ENSG00000133250	ZNF414	Control vs JetLag - all samples	LimmaVoom	0.500056	-1.02553	0.240907	0.80351
ENSG00000183199	AC093768.1	Control vs JetLag - all samples	LimmaVoom	0.499973	-0.302074	0.0974012	0.696013
ENSG00000279862	AC092964.1	Control vs JetLag - all samples	LimmaVoom	0.499672	-2.42745	0.0476086	0.626128
ENSG00000228782	MRPL45P2	Control vs JetLag - all samples	LimmaVoom	0.499486	1.67348	0.103547	0.701736
ENSG00000224982	TMEM233	Control vs JetLag - all samples	LimmaVoom	0.499467	-2.12645	0.121912	0.715547
ENSG00000226360	AC096919.1	Control vs JetLag - all samples	LimmaVoom	0.499232	-1.11193	0.133088	0.725509
ENSG00000260805	AC092803.2	Control vs JetLag - all samples	LimmaVoom	0.499111	1.91559	0.0225961	0.554286
ENSG00000185053	SGCZ	Control vs JetLag - all samples	LimmaVoom	0.499036	-2.45233	0.0337212	0.590034
ENSG00000149596	JPH2	Control vs JetLag - all samples	LimmaVoom	0.498931	1.5597	0.00825545	0.453367
ENSG00000196169	KIF19	Control vs JetLag - all samples	LimmaVoom	0.498877	-1.52675	0.148205	0.738573
ENSG00000103335	PIEZO1	Control vs JetLag - all samples	LimmaVoom	0.498832	4.24646	0.00346038	0.400589
ENSG00000274272	AC069281.2	Control vs JetLag - all samples	LimmaVoom	0.49872	-1.50689	0.142341	0.735021
ENSG00000126759	CFP	Control vs JetLag - all samples	LimmaVoom	0.498642	-0.72166	0.196612	0.774054
ENSG00000143882	ATP6V1C2	Control vs JetLag - all samples	LimmaVoom	0.498466	-0.26067	0.163033	0.749383
ENSG00000090539	CHRD	Control vs JetLag - all samples	LimmaVoom	0.498422	2.46661	0.00424858	0.418145
ENSG00000284681	AC007240.1	Control vs JetLag - all samples	LimmaVoom	0.49842	-0.33542	0.0955287	0.693701
ENSG00000123989	CHPF	Control vs JetLag - all samples	LimmaVoom	0.4984	5.61169	0.00212064	0.373334
ENSG00000163618	CADPS	Control vs JetLag - all samples	LimmaVoom	0.498332	-0.250579	0.155963	0.743062
ENSG00000204967	PCDHA4	Control vs JetLag - all samples	LimmaVoom	0.498295	3.10439	0.0173035	0.532346
ENSG00000139890	REM2	Control vs JetLag - all samples	LimmaVoom	0.498009	-0.331671	0.212102	0.785206
ENSG00000213016	AC245036.1	Control vs JetLag - all samples	LimmaVoom	0.497946	-2.50458	0.0324247	0.586713
ENSG00000228857	AC104653.1	Control vs JetLag - all samples	LimmaVoom	0.497872	-2.44094	0.0399257	0.603508
ENSG00000242635	RPS14P7	Control vs JetLag - all samples	LimmaVoom	0.497863	-2.69769	0.00510512	0.423029
ENSG00000092068	SLC7A8	Control vs JetLag - all samples	LimmaVoom	0.497821	0.626056	0.112301	0.707512
ENSG00000241462	AC100832.1	Control vs JetLag - all samples	LimmaVoom	0.49769	-2.80427	0.012612	0.500509
ENSG00000227456	LINC00310	Control vs JetLag - all samples	LimmaVoom	0.497415	-1.33614	0.139804	0.733191
ENSG00000226798	AL138749.1	Control vs JetLag - all samples	LimmaVoom	0.497362	-1.31481	0.243151	0.804791
ENSG00000267302	AC005702.1	Control vs JetLag - all samples	LimmaVoom	0.497109	-1.43591	0.198048	0.775795
ENSG00000130669	PAK4	Control vs JetLag - all samples	LimmaVoom	0.496823	3.93411	0.0139655	0.512249
ENSG00000149639	SOGA1	Control vs JetLag - all samples	LimmaVoom	0.496359	2.01086	0.0681177	0.660623
ENSG00000235947	EGOT	Control vs JetLag - all samples	LimmaVoom	0.496029	-1.59491	0.181311	0.76816
ENSG00000240288	GHRLOS	Control vs JetLag - all samples	LimmaVoom	0.495891	-1.85275	0.140292	0.733663
ENSG00000231274	SBK3	Control vs JetLag - all samples	LimmaVoom	0.495852	-0.963001	0.19984	0.775795
ENSG00000164185	ZNF474	Control vs JetLag - all samples	LimmaVoom	0.495833	-1.11641	0.22613	0.793842
ENSG00000277368	AL138966.2	Control vs JetLag - all samples	LimmaVoom	0.495757	-2.2118	0.0740542	0.668775
ENSG00000205794	AC098591.1	Control vs JetLag - all samples	LimmaVoom	0.495571	-1.57481	0.0769267	0.670421
ENSG00000196284	SUPT3H	Control vs JetLag - all samples	LimmaVoom	0.495495	-1.33616	0.208371	0.781832
ENSG00000234210	AC006372.3	Control vs JetLag - all samples	LimmaVoom	0.495439	-2.30748	0.114731	0.710153
ENSG00000166349	RAG1	Control vs JetLag - all samples	LimmaVoom	0.495434	0.674478	0.118714	0.714011
ENSG00000215030	AC073621.1	Control vs JetLag - all samples	LimmaVoom	0.495139	4.57998	0.0135456	0.51093
ENSG00000182870	GALNT9	Control vs JetLag - all samples	LimmaVoom	0.495135	4.35575	0.00043501	0.29387
ENSG00000163131	CTSS	Control vs JetLag - all samples	LimmaVoom	0.49512	0.297263	0.13455	0.72676
ENSG00000275389	AC068790.9	Control vs JetLag - all samples	LimmaVoom	0.49499	-1.73675	0.138578	0.730977
ENSG00000275807	AC145285.7	Control vs JetLag - all samples	LimmaVoom	0.494878	-0.632025	0.24836	0.807467
ENSG00000152583	SPARCL1	Control vs JetLag - all samples	LimmaVoom	0.494664	2.5219	0.0579517	0.643419
ENSG00000283599	BX276092.9	Control vs JetLag - all samples	LimmaVoom	0.494353	-2.55241	0.0273685	0.575033
ENSG00000161682	FAM171A2	Control vs JetLag - all samples	LimmaVoom	0.494303	2.69918	0.0141123	0.512249
ENSG00000166105	GLB1L3	Control vs JetLag - all samples	LimmaVoom	0.494214	0.762139	0.0671213	0.657717
ENSG00000111186	WNT5B	Control vs JetLag - all samples	LimmaVoom	0.494074	1.03616	0.051815	0.633312
ENSG00000070423	RNF126	Control vs JetLag - all samples	LimmaVoom	0.493756	3.44149	0.00137538	0.361136
ENSG00000214106	PAXIP1-AS2	Control vs JetLag - all samples	LimmaVoom	0.493262	0.0722493	0.175113	0.761586
ENSG00000140564	FURIN	Control vs JetLag - all samples	LimmaVoom	0.493161	4.84728	0.00240415	0.377132
ENSG00000168010	ATG16L2	Control vs JetLag - all samples	LimmaVoom	0.492806	1.4838	0.0308112	0.585011
ENSG00000184619	KRBA2	Control vs JetLag - all samples	LimmaVoom	0.492757	-0.22264	0.134724	0.72676
ENSG00000235023	AP001626.1	Control vs JetLag - all samples	LimmaVoom	0.492721	-2.15049	0.133026	0.725509
ENSG00000183963	SMTN	Control vs JetLag - all samples	LimmaVoom	0.492488	4.09874	0.00626059	0.43469
ENSG00000223482	NUTM2A-AS1	Control vs JetLag - all samples	LimmaVoom	0.492446	2.33717	0.00372068	0.409311
ENSG00000248079	DPH6-AS1	Control vs JetLag - all samples	LimmaVoom	0.492364	-2.38985	0.133064	0.725509
ENSG00000159640	ACE	Control vs JetLag - all samples	LimmaVoom	0.492194	-2.05282	0.159262	0.745045
ENSG00000064218	DMRT3	Control vs JetLag - all samples	LimmaVoom	0.49217	-1.61884	0.217213	0.790195
ENSG00000274297	AC009269.6	Control vs JetLag - all samples	LimmaVoom	0.492137	-1.91216	0.0861991	0.683692
ENSG00000099849	RASSF7	Control vs JetLag - all samples	LimmaVoom	0.492117	4.10489	0.00130656	0.361136
ENSG00000172497	ACOT12	Control vs JetLag - all samples	LimmaVoom	0.491967	-2.43211	0.0939507	0.690925
ENSG00000235927	NEXN-AS1	Control vs JetLag - all samples	LimmaVoom	0.491919	-1.21289	0.140012	0.73347
ENSG00000269940	AL049840.3	Control vs JetLag - all samples	LimmaVoom	0.491908	-1.69868	0.163477	0.749789
ENSG00000271730	AL390208.1	Control vs JetLag - all samples	LimmaVoom	0.491743	-2.38571	0.0233499	0.559082
ENSG00000148288	GBGT1	Control vs JetLag - all samples	LimmaVoom	0.491364	1.31312	0.0648897	0.655359
ENSG00000221866	PLXNA4	Control vs JetLag - all samples	LimmaVoom	0.491255	0.426017	0.0927436	0.689024
ENSG00000213218	CSH2	Control vs JetLag - all samples	LimmaVoom	0.491048	-2.44442	0.034349	0.590034
ENSG00000205746	AC126755.1	Control vs JetLag - all samples	LimmaVoom	0.490865	-0.669629	0.195144	0.773407
ENSG00000103254	FAM173A	Control vs JetLag - all samples	LimmaVoom	0.490861	4.54225	0.000553457	0.308073
ENSG00000132613	MTSS1L	Control vs JetLag - all samples	LimmaVoom	0.490851	1.68084	0.0696772	0.662123
ENSG00000129038	LOXL1	Control vs JetLag - all samples	LimmaVoom	0.490807	4.58068	0.00293947	0.391214
ENSG00000078900	TP73	Control vs JetLag - all samples	LimmaVoom	0.490745	1.4339	0.057062	0.642623
ENSG00000249163	AL121809.1	Control vs JetLag - all samples	LimmaVoom	0.4907	-1.47602	0.143018	0.735161
ENSG00000264334	AC134978.1	Control vs JetLag - all samples	LimmaVoom	0.490647	-1.15312	0.200641	0.776033
ENSG00000113430	IRX4	Control vs JetLag - all samples	LimmaVoom	0.490475	1.86912	0.0450108	0.620107
ENSG00000116833	NR5A2	Control vs JetLag - all samples	LimmaVoom	0.490359	-0.460562	0.158558	0.744617
ENSG00000175785	PRIMA1	Control vs JetLag - all samples	LimmaVoom	0.490309	-2.55391	0.0379267	0.599332
ENSG00000134830	C5AR2	Control vs JetLag - all samples	LimmaVoom	0.490237	-2.03498	0.119212	0.714388
ENSG00000244731	C4A	Control vs JetLag - all samples	LimmaVoom	0.490156	0.250085	0.182596	0.768663
ENSG00000273253	AL022328.4	Control vs JetLag - all samples	LimmaVoom	0.489968	0.128651	0.0643269	0.654314
ENSG00000279464	AC096720.2	Control vs JetLag - all samples	LimmaVoom	0.489923	-1.17942	0.209491	0.782059
ENSG00000260456	C16orf95	Control vs JetLag - all samples	LimmaVoom	0.489837	0.131341	0.136632	0.729188
ENSG00000012171	SEMA3B	Control vs JetLag - all samples	LimmaVoom	0.489475	2.79354	0.00401411	0.417993
ENSG00000205593	DENND6B	Control vs JetLag - all samples	LimmaVoom	0.48947	1.1652	0.0839612	0.682116
ENSG00000265485	LINC01915	Control vs JetLag - all samples	LimmaVoom	0.489447	-0.927761	0.193298	0.771894
ENSG00000250539	KRT8P33	Control vs JetLag - all samples	LimmaVoom	0.489441	0.363269	0.152548	0.741954
ENSG00000032444	PNPLA6	Control vs JetLag - all samples	LimmaVoom	0.489393	3.86523	0.00552178	0.426738
ENSG00000163794	UCN	Control vs JetLag - all samples	LimmaVoom	0.489319	0.232533	0.147952	0.738435
ENSG00000159231	CBR3	Control vs JetLag - all samples	LimmaVoom	0.489253	1.33041	0.0266331	0.573131
ENSG00000157933	SKI	Control vs JetLag - all samples	LimmaVoom	0.489184	2.83316	0.0105623	0.483657
ENSG00000260750	AC092720.1	Control vs JetLag - all samples	LimmaVoom	0.489055	-1.67979	0.130519	0.723502
ENSG00000196557	CACNA1H	Control vs JetLag - all samples	LimmaVoom	0.488996	3.09314	0.0216255	0.552669
ENSG00000225528	Z82206.1	Control vs JetLag - all samples	LimmaVoom	0.488888	-2.14293	0.134465	0.72676
ENSG00000105329	TGFB1	Control vs JetLag - all samples	LimmaVoom	0.488882	3.06264	0.0349639	0.593074
ENSG00000266248	AC011474.2	Control vs JetLag - all samples	LimmaVoom	0.488852	-2.46411	0.055815	0.640724
ENSG00000205632	LINC01310	Control vs JetLag - all samples	LimmaVoom	0.488736	-2.26165	0.0752369	0.668965
ENSG00000103647	CORO2B	Control vs JetLag - all samples	LimmaVoom	0.48856	1.64397	0.0206933	0.550488
ENSG00000130433	CACNG6	Control vs JetLag - all samples	LimmaVoom	0.488397	2.26757	0.0177045	0.533958
ENSG00000188760	TMEM198	Control vs JetLag - all samples	LimmaVoom	0.488392	0.481074	0.100415	0.699035
ENSG00000280055	TMEM75	Control vs JetLag - all samples	LimmaVoom	0.488383	-2.49614	0.0470891	0.624709
ENSG00000186111	PIP5K1C	Control vs JetLag - all samples	LimmaVoom	0.487809	2.2489	0.0303802	0.584514
ENSG00000127528	KLF2	Control vs JetLag - all samples	LimmaVoom	0.487784	-1.35901	0.195268	0.773407
ENSG00000120555	SEPT7P9	Control vs JetLag - all samples	LimmaVoom	0.487406	-2.34757	0.0908129	0.686923
ENSG00000242265	PEG10	Control vs JetLag - all samples	LimmaVoom	0.487271	-0.0599726	0.161981	0.748015
ENSG00000238057	ZEB2-AS1	Control vs JetLag - all samples	LimmaVoom	0.487097	-2.63416	0.0238693	0.561206
ENSG00000196739	COL27A1	Control vs JetLag - all samples	LimmaVoom	0.486983	1.89921	0.121711	0.715547
ENSG00000250853	RNF138P1	Control vs JetLag - all samples	LimmaVoom	0.486943	-2.10008	0.141905	0.734897
ENSG00000226640	AL357793.1	Control vs JetLag - all samples	LimmaVoom	0.486943	-2.70194	0.00823758	0.453367
ENSG00000230730	AC074011.1	Control vs JetLag - all samples	LimmaVoom	0.486939	-2.40528	0.0544339	0.636835
ENSG00000103253	HAGHL	Control vs JetLag - all samples	LimmaVoom	0.486929	4.56138	0.000265551	0.267816
ENSG00000163945	UVSSA	Control vs JetLag - all samples	LimmaVoom	0.486903	2.41688	0.00192825	0.37003
ENSG00000164403	SHROOM1	Control vs JetLag - all samples	LimmaVoom	0.486894	2.54752	0.00602683	0.431923
ENSG00000247011	AC005920.1	Control vs JetLag - all samples	LimmaVoom	0.486839	-0.978529	0.198075	0.775795
ENSG00000178591	DEFB125	Control vs JetLag - all samples	LimmaVoom	0.486654	-2.75032	0.00931516	0.46799
ENSG00000136535	TBR1	Control vs JetLag - all samples	LimmaVoom	0.486601	-0.906768	0.158808	0.744992
ENSG00000251141	AC093297.2	Control vs JetLag - all samples	LimmaVoom	0.486523	-0.430407	0.0784804	0.672305
ENSG00000133321	RARRES3	Control vs JetLag - all samples	LimmaVoom	0.486389	1.52932	0.0743076	0.668775
ENSG00000243284	VSIG8	Control vs JetLag - all samples	LimmaVoom	0.486216	-2.14772	0.11575	0.711096
ENSG00000187800	PEAR1	Control vs JetLag - all samples	LimmaVoom	0.485984	-0.0114923	0.161934	0.748015
ENSG00000259230	LINC02323	Control vs JetLag - all samples	LimmaVoom	0.485812	0.589802	0.068338	0.660968
ENSG00000171298	GAA	Control vs JetLag - all samples	LimmaVoom	0.485792	4.64747	0.00771653	0.446265
ENSG00000138798	EGF	Control vs JetLag - all samples	LimmaVoom	0.485783	0.17726	0.122705	0.716029
ENSG00000278978	AC092611.3	Control vs JetLag - all samples	LimmaVoom	0.485767	-1.16231	0.185659	0.768663
ENSG00000231841	FAM192BP	Control vs JetLag - all samples	LimmaVoom	0.485601	-2.01103	0.117513	0.713046
ENSG00000130720	FIBCD1	Control vs JetLag - all samples	LimmaVoom	0.485537	4.48779	0.00174774	0.37003
ENSG00000277383	AC010331.1	Control vs JetLag - all samples	LimmaVoom	0.485055	0.27298	0.0884756	0.685028
ENSG00000186493	C5orf38	Control vs JetLag - all samples	LimmaVoom	0.484817	-2.32972	0.0431821	0.612588
ENSG00000240869	RN7SL128P	Control vs JetLag - all samples	LimmaVoom	0.484701	-0.922816	0.150038	0.74048
ENSG00000272599	AC016394.1	Control vs JetLag - all samples	LimmaVoom	0.484663	1.24996	0.126986	0.720367
ENSG00000229512	AC068580.1	Control vs JetLag - all samples	LimmaVoom	0.484397	-2.18708	0.0904907	0.686275
ENSG00000275142	AL132821.1	Control vs JetLag - all samples	LimmaVoom	0.484388	-1.74828	0.156055	0.743062
ENSG00000224745	AC063965.1	Control vs JetLag - all samples	LimmaVoom	0.484315	-2.04749	0.133179	0.725509
ENSG00000224723	GUSBP10	Control vs JetLag - all samples	LimmaVoom	0.484168	-0.302881	0.124715	0.717608
ENSG00000177721	ANXA2R	Control vs JetLag - all samples	LimmaVoom	0.484039	-2.20011	0.0928228	0.689024
ENSG00000129009	ISLR	Control vs JetLag - all samples	LimmaVoom	0.483957	-0.645525	0.252776	0.809551
ENSG00000063660	GPC1	Control vs JetLag - all samples	LimmaVoom	0.483855	5.66028	0.00480496	0.421155
ENSG00000251493	FOXD1	Control vs JetLag - all samples	LimmaVoom	0.483695	2.75836	0.00530262	0.423029
ENSG00000236341	AL161740.1	Control vs JetLag - all samples	LimmaVoom	0.483674	-2.72518	0.00524315	0.423029
ENSG00000188486	H2AFX	Control vs JetLag - all samples	LimmaVoom	0.483669	6.72829	0.00300928	0.394821
ENSG00000111335	OAS2	Control vs JetLag - all samples	LimmaVoom	0.483564	0.626136	0.104225	0.701736
ENSG00000204428	LY6G5C	Control vs JetLag - all samples	LimmaVoom	0.483346	-0.521123	0.114482	0.709811
ENSG00000251139	AC084871.1	Control vs JetLag - all samples	LimmaVoom	0.483135	-2.57519	0.0314772	0.585269
ENSG00000277214	AC009159.2	Control vs JetLag - all samples	LimmaVoom	0.483084	-1.95762	0.132213	0.725509
ENSG00000278518	AL161645.1	Control vs JetLag - all samples	LimmaVoom	0.482849	-2.02695	0.155436	0.743062
ENSG00000185818	NAT8L	Control vs JetLag - all samples	LimmaVoom	0.482702	2.24369	0.0767264	0.670268
ENSG00000268543	AC012313.4	Control vs JetLag - all samples	LimmaVoom	0.482664	-2.05407	0.126378	0.720305
ENSG00000249572	AC034231.1	Control vs JetLag - all samples	LimmaVoom	0.482389	0.172692	0.147891	0.738435
ENSG00000000938	FGR	Control vs JetLag - all samples	LimmaVoom	0.482363	-2.29447	0.0711226	0.664937
ENSG00000231738	TSPAN19	Control vs JetLag - all samples	LimmaVoom	0.48221	-0.186374	0.140524	0.733663
ENSG00000118160	SLC8A2	Control vs JetLag - all samples	LimmaVoom	0.482201	1.92697	0.00723518	0.441271
ENSG00000170423	KRT78	Control vs JetLag - all samples	LimmaVoom	0.482185	-2.47605	0.0213401	0.552669
ENSG00000163508	EOMES	Control vs JetLag - all samples	LimmaVoom	0.48211	-2.40506	0.0806156	0.675493
ENSG00000136732	GYPC	Control vs JetLag - all samples	LimmaVoom	0.481963	-2.52713	0.0577127	0.643419
ENSG00000125878	TCF15	Control vs JetLag - all samples	LimmaVoom	0.481948	-0.752393	0.194772	0.773387
ENSG00000112033	PPARD	Control vs JetLag - all samples	LimmaVoom	0.481753	2.42322	0.0814838	0.677641
ENSG00000213088	ACKR1	Control vs JetLag - all samples	LimmaVoom	0.481723	0.243482	0.0761438	0.670123
ENSG00000215186	GOLGA6B	Control vs JetLag - all samples	LimmaVoom	0.481516	-2.67607	0.00421084	0.418145
ENSG00000173557	C2orf70	Control vs JetLag - all samples	LimmaVoom	0.481277	-2.08785	0.163306	0.749517
ENSG00000270640	AC104695.3	Control vs JetLag - all samples	LimmaVoom	0.481254	-0.450364	0.167219	0.754493
ENSG00000272325	NUDT3	Control vs JetLag - all samples	LimmaVoom	0.481231	1.63431	0.00650866	0.438279
ENSG00000224763	FDPSP8	Control vs JetLag - all samples	LimmaVoom	0.481214	-1.44135	0.220241	0.791037
ENSG00000141577	CEP131	Control vs JetLag - all samples	LimmaVoom	0.481142	3.0381	0.0120726	0.493484
ENSG00000150783	TEX12	Control vs JetLag - all samples	LimmaVoom	0.480479	-1.91758	0.147909	0.738435
ENSG00000224019	RPL21P32	Control vs JetLag - all samples	LimmaVoom	0.480114	-2.24631	0.069811	0.662123
ENSG00000226913	BSN-AS2	Control vs JetLag - all samples	LimmaVoom	0.48001	-1.36433	0.209851	0.782644
ENSG00000278869	BX539320.1	Control vs JetLag - all samples	LimmaVoom	0.479948	0.235327	0.200345	0.776033
ENSG00000225224	RPS27AP12	Control vs JetLag - all samples	LimmaVoom	0.479861	-2.53	0.021373	0.552669
ENSG00000164047	CAMP	Control vs JetLag - all samples	LimmaVoom	0.479852	-1.91258	0.159419	0.745413
ENSG00000267672	AC010632.2	Control vs JetLag - all samples	LimmaVoom	0.479619	-2.31956	0.0475963	0.626128
ENSG00000235330	RPL12P25	Control vs JetLag - all samples	LimmaVoom	0.479404	-2.33207	0.0790588	0.672871
ENSG00000145040	UCN2	Control vs JetLag - all samples	LimmaVoom	0.479025	0.321388	0.132249	0.725509
ENSG00000075618	FSCN1	Control vs JetLag - all samples	LimmaVoom	0.478854	7.23879	0.00436822	0.418145
ENSG00000175749	EIF3KP1	Control vs JetLag - all samples	LimmaVoom	0.478765	-2.31909	0.119607	0.714388
ENSG00000140279	DUOX2	Control vs JetLag - all samples	LimmaVoom	0.478364	-2.20923	0.0960686	0.693701
ENSG00000181656	GPR88	Control vs JetLag - all samples	LimmaVoom	0.478189	-2.64888	0.0140517	0.512249
ENSG00000148824	MTG1	Control vs JetLag - all samples	LimmaVoom	0.478106	2.22861	0.0155449	0.519172
ENSG00000237031	AC008067.1	Control vs JetLag - all samples	LimmaVoom	0.478089	-2.29364	0.102337	0.700162
ENSG00000125844	RRBP1	Control vs JetLag - all samples	LimmaVoom	0.478087	3.16994	0.0305872	0.584514
ENSG00000126709	IFI6	Control vs JetLag - all samples	LimmaVoom	0.477922	4.65633	0.000529938	0.302644
ENSG00000259969	AL049838.1	Control vs JetLag - all samples	LimmaVoom	0.477761	-2.49488	0.0245439	0.561875
ENSG00000196748	CLPSL2	Control vs JetLag - all samples	LimmaVoom	0.477489	0.595401	0.106079	0.703254
ENSG00000238045	AC009133.1	Control vs JetLag - all samples	LimmaVoom	0.477427	-0.618093	0.209579	0.782123
ENSG00000175221	MED16	Control vs JetLag - all samples	LimmaVoom	0.477388	3.91497	0.00352772	0.400589
ENSG00000198792	TMEM184B	Control vs JetLag - all samples	LimmaVoom	0.477299	3.88032	0.00143872	0.361136
ENSG00000223773	CD99P1	Control vs JetLag - all samples	LimmaVoom	0.477198	-0.243313	0.183231	0.768663
ENSG00000122378	FAM213A	Control vs JetLag - all samples	LimmaVoom	0.477171	1.4758	0.10201	0.700162
ENSG00000241697	TMEFF1	Control vs JetLag - all samples	LimmaVoom	0.476743	-0.421614	0.217668	0.790439
ENSG00000258480	AL352977.2	Control vs JetLag - all samples	LimmaVoom	0.476719	-2.65688	0.00766025	0.445123
ENSG00000259066	AL110118.2	Control vs JetLag - all samples	LimmaVoom	0.47647	-2.64954	0.0271879	0.573924
ENSG00000187775	DNAH17	Control vs JetLag - all samples	LimmaVoom	0.476437	-0.568684	0.23313	0.798889
ENSG00000174943	KCTD13	Control vs JetLag - all samples	LimmaVoom	0.476122	1.80361	0.0157813	0.519172
ENSG00000277268	AC243773.2	Control vs JetLag - all samples	LimmaVoom	0.47608	-2.536	0.037726	0.598263
ENSG00000006118	TMEM132A	Control vs JetLag - all samples	LimmaVoom	0.476044	5.05373	0.0061037	0.434063
ENSG00000177025	C19orf18	Control vs JetLag - all samples	LimmaVoom	0.475843	-2.05722	0.154861	0.742907
ENSG00000250571	GLI4	Control vs JetLag - all samples	LimmaVoom	0.475832	2.52551	0.0108271	0.483657
ENSG00000235111	Z97192.3	Control vs JetLag - all samples	LimmaVoom	0.475662	-1.20544	0.202045	0.777506
ENSG00000267147	LINC01842	Control vs JetLag - all samples	LimmaVoom	0.475618	-2.55792	0.0101657	0.483657
ENSG00000243986	ENO1P3	Control vs JetLag - all samples	LimmaVoom	0.475559	-2.20032	0.0852502	0.682116
ENSG00000261194	LINC01898	Control vs JetLag - all samples	LimmaVoom	0.475356	-2.57436	0.0100412	0.48227
ENSG00000258735	LINC00637	Control vs JetLag - all samples	LimmaVoom	0.475206	-2.5143	0.010486	0.483657
ENSG00000135144	DTX1	Control vs JetLag - all samples	LimmaVoom	0.475129	1.95131	0.0310002	0.585269
ENSG00000104967	NOVA2	Control vs JetLag - all samples	LimmaVoom	0.475025	0.494918	0.114613	0.709976
ENSG00000167702	KIFC2	Control vs JetLag - all samples	LimmaVoom	0.4747	3.62305	0.0019276	0.37003
ENSG00000163286	ALPPL2	Control vs JetLag - all samples	LimmaVoom	0.474683	-2.61657	0.0274178	0.575083
ENSG00000269855	RNF225	Control vs JetLag - all samples	LimmaVoom	0.474678	-2.18992	0.127082	0.720465
ENSG00000257585	LINC00609	Control vs JetLag - all samples	LimmaVoom	0.474625	-2.54439	0.0401151	0.603704
ENSG00000229214	LINC00242	Control vs JetLag - all samples	LimmaVoom	0.474617	-0.0624903	0.0956505	0.693701
ENSG00000253608	AC022915.2	Control vs JetLag - all samples	LimmaVoom	0.474558	-2.40917	0.0436681	0.612873
ENSG00000187806	TMEM202	Control vs JetLag - all samples	LimmaVoom	0.474499	-2.59874	0.035943	0.595873
ENSG00000127252	HRASLS	Control vs JetLag - all samples	LimmaVoom	0.474487	1.39748	0.11649	0.712111
ENSG00000107331	ABCA2	Control vs JetLag - all samples	LimmaVoom	0.474369	3.90363	0.00632709	0.43469
ENSG00000258573	AL163195.2	Control vs JetLag - all samples	LimmaVoom	0.474286	-2.78177	0.00393361	0.413142
ENSG00000280953	LINC01163	Control vs JetLag - all samples	LimmaVoom	0.474231	-1.19428	0.221137	0.791432
ENSG00000267603	LINC01028	Control vs JetLag - all samples	LimmaVoom	0.474171	-0.216639	0.104977	0.702513
ENSG00000268439	EMG1	Control vs JetLag - all samples	LimmaVoom	0.47411	-0.055008	0.26917	0.818775
ENSG00000144285	SCN1A	Control vs JetLag - all samples	LimmaVoom	0.473884	0.675311	0.136512	0.729053
ENSG00000107731	UNC5B	Control vs JetLag - all samples	LimmaVoom	0.473647	4.5431	0.00349568	0.400589
ENSG00000249584	LINC02225	Control vs JetLag - all samples	LimmaVoom	0.473647	-2.48057	0.0220859	0.552669
ENSG00000242020	RN7SL68P	Control vs JetLag - all samples	LimmaVoom	0.473217	-2.48294	0.0389897	0.601507
ENSG00000187867	PALM3	Control vs JetLag - all samples	LimmaVoom	0.472851	-1.99095	0.140486	0.733663
ENSG00000026751	SLAMF7	Control vs JetLag - all samples	LimmaVoom	0.472761	-0.132544	0.200104	0.775998
ENSG00000280028	AC007431.3	Control vs JetLag - all samples	LimmaVoom	0.472701	-2.45603	0.038678	0.600557
ENSG00000186676	EEF1GP1	Control vs JetLag - all samples	LimmaVoom	0.472647	-2.62869	0.0210362	0.551846
ENSG00000250220	AC053527.1	Control vs JetLag - all samples	LimmaVoom	0.472639	-1.3985	0.177891	0.765223
ENSG00000196476	C20orf96	Control vs JetLag - all samples	LimmaVoom	0.472503	2.02025	0.0214826	0.552669
ENSG00000215790	SLC35E2	Control vs JetLag - all samples	LimmaVoom	0.472444	2.47949	0.0108874	0.483657
ENSG00000243243	AC073130.2	Control vs JetLag - all samples	LimmaVoom	0.472358	-2.44713	0.0483041	0.627133
ENSG00000077984	CST7	Control vs JetLag - all samples	LimmaVoom	0.472311	0.962251	0.142798	0.735038
ENSG00000178934	LGALS7B	Control vs JetLag - all samples	LimmaVoom	0.472035	-2.13444	0.109164	0.705188
ENSG00000240233	RN7SL587P	Control vs JetLag - all samples	LimmaVoom	0.471995	-2.3297	0.105843	0.703254
ENSG00000271871	AC005740.4	Control vs JetLag - all samples	LimmaVoom	0.471583	-2.41141	0.146183	0.737054
ENSG00000187688	TRPV2	Control vs JetLag - all samples	LimmaVoom	0.471428	1.22984	0.0714576	0.665476
ENSG00000261758	AC117382.2	Control vs JetLag - all samples	LimmaVoom	0.47127	-0.361506	0.232206	0.798889
ENSG00000205559	CHKB-AS1	Control vs JetLag - all samples	LimmaVoom	0.471083	-0.314715	0.150056	0.74048
ENSG00000231793	DOC2GP	Control vs JetLag - all samples	LimmaVoom	0.471056	-0.943046	0.208697	0.781832
ENSG00000213563	C8orf82	Control vs JetLag - all samples	LimmaVoom	0.471025	4.91538	0.000285769	0.267816
ENSG00000104859	CLASRP	Control vs JetLag - all samples	LimmaVoom	0.47096	2.37109	0.0111151	0.483657
ENSG00000260577	AC126773.2	Control vs JetLag - all samples	LimmaVoom	0.47094	-2.64402	0.0267248	0.573131
ENSG00000275764	AC092747.4	Control vs JetLag - all samples	LimmaVoom	0.470679	0.653437	0.187658	0.76871
ENSG00000248872	LINC02431	Control vs JetLag - all samples	LimmaVoom	0.470622	-2.52623	0.125328	0.719265
ENSG00000188566	NDOR1	Control vs JetLag - all samples	LimmaVoom	0.470449	2.22132	0.052858	0.634969
ENSG00000268895	A1BG-AS1	Control vs JetLag - all samples	LimmaVoom	0.470419	0.834045	0.084318	0.682116
ENSG00000141582	CBX4	Control vs JetLag - all samples	LimmaVoom	0.470403	3.83454	0.00518252	0.423029
ENSG00000233359	AC114485.1	Control vs JetLag - all samples	LimmaVoom	0.470356	-1.46314	0.160591	0.746484
ENSG00000125046	SSUH2	Control vs JetLag - all samples	LimmaVoom	0.470245	-0.150711	0.17878	0.76577
ENSG00000223837	AL645941.1	Control vs JetLag - all samples	LimmaVoom	0.470235	-2.46461	0.0365798	0.596978
ENSG00000226472	AC008013.1	Control vs JetLag - all samples	LimmaVoom	0.470133	-1.88041	0.170765	0.757694
ENSG00000280303	AC067931.2	Control vs JetLag - all samples	LimmaVoom	0.470018	0.122485	0.101712	0.69969
ENSG00000261587	TMEM249	Control vs JetLag - all samples	LimmaVoom	0.470016	-1.35658	0.254882	0.811418
ENSG00000175048	ZDHHC14	Control vs JetLag - all samples	LimmaVoom	0.469808	1.99066	0.112215	0.707512
ENSG00000249936	RAC1P2	Control vs JetLag - all samples	LimmaVoom	0.469751	-0.487461	0.20144	0.776542
ENSG00000252879	RN7SKP98	Control vs JetLag - all samples	LimmaVoom	0.469679	-2.59303	0.0249575	0.562871
ENSG00000260765	CES1P2	Control vs JetLag - all samples	LimmaVoom	0.469512	-2.43798	0.0308881	0.585011
ENSG00000128052	KDR	Control vs JetLag - all samples	LimmaVoom	0.46928	0.349032	0.147588	0.738435
ENSG00000204616	TRIM31	Control vs JetLag - all samples	LimmaVoom	0.469258	-1.88109	0.131329	0.724432
ENSG00000235508	RPS2P7	Control vs JetLag - all samples	LimmaVoom	0.469248	-2.62293	0.0125554	0.49989
ENSG00000184156	KCNQ3	Control vs JetLag - all samples	LimmaVoom	0.469212	2.59137	0.0844007	0.682116
ENSG00000026559	KCNG1	Control vs JetLag - all samples	LimmaVoom	0.469157	2.4319	0.0140346	0.512249
ENSG00000205871	AC068724.1	Control vs JetLag - all samples	LimmaVoom	0.468839	-2.37358	0.133155	0.725509
ENSG00000152705	CATSPER3	Control vs JetLag - all samples	LimmaVoom	0.468808	-1.27545	0.233297	0.798889
ENSG00000255364	SMILR	Control vs JetLag - all samples	LimmaVoom	0.468731	-1.02145	0.183464	0.768663
ENSG00000232117	LINC00384	Control vs JetLag - all samples	LimmaVoom	0.468221	-2.53855	0.0453477	0.620539
ENSG00000266962	AC067852.2	Control vs JetLag - all samples	LimmaVoom	0.468059	1.96213	0.046525	0.622662
ENSG00000169744	LDB2	Control vs JetLag - all samples	LimmaVoom	0.468011	1.53988	0.0750527	0.668775
ENSG00000188803	SHISA6	Control vs JetLag - all samples	LimmaVoom	0.467984	-2.40038	0.0394316	0.602267
ENSG00000115297	TLX2	Control vs JetLag - all samples	LimmaVoom	0.467788	1.89095	0.0455983	0.622025
ENSG00000251056	ANKRD20A17P	Control vs JetLag - all samples	LimmaVoom	0.467762	-2.32067	0.0577683	0.643419
ENSG00000250303	AP002884.3	Control vs JetLag - all samples	LimmaVoom	0.467638	1.33562	0.105103	0.702636
ENSG00000008710	PKD1	Control vs JetLag - all samples	LimmaVoom	0.467626	4.08971	0.0035017	0.400589
ENSG00000243094	AC079203.1	Control vs JetLag - all samples	LimmaVoom	0.467252	-2.41439	0.0853254	0.682116
ENSG00000162426	SLC45A1	Control vs JetLag - all samples	LimmaVoom	0.467221	-1.68285	0.186062	0.768663
ENSG00000015592	STMN4	Control vs JetLag - all samples	LimmaVoom	0.467124	-2.31253	0.159129	0.744992
ENSG00000160216	AGPAT3	Control vs JetLag - all samples	LimmaVoom	0.466843	-2.32034	0.0817497	0.678001
ENSG00000167895	TMC8	Control vs JetLag - all samples	LimmaVoom	0.466706	0.938707	0.19796	0.775795
ENSG00000180815	MAP3K15	Control vs JetLag - all samples	LimmaVoom	0.466588	-2.56383	0.050218	0.63047
ENSG00000241475	AL160408.4	Control vs JetLag - all samples	LimmaVoom	0.466535	-2.73203	0.00955674	0.474591
ENSG00000177462	OR2T8	Control vs JetLag - all samples	LimmaVoom	0.466532	-2.42509	0.102909	0.70057
ENSG00000251034	AC037459.2	Control vs JetLag - all samples	LimmaVoom	0.465967	-2.33659	0.0405637	0.605626
ENSG00000280071	FP565260.6	Control vs JetLag - all samples	LimmaVoom	0.465647	-0.0569329	0.158386	0.744566
ENSG00000114554	PLXNA1	Control vs JetLag - all samples	LimmaVoom	0.465503	5.53501	0.00208998	0.373334
ENSG00000136929	HEMGN	Control vs JetLag - all samples	LimmaVoom	0.465494	-2.47273	0.0511253	0.631817
ENSG00000081148	IMPG2	Control vs JetLag - all samples	LimmaVoom	0.465281	1.40218	0.156897	0.743444
ENSG00000258611	AC087641.1	Control vs JetLag - all samples	LimmaVoom	0.465201	-2.44178	0.100147	0.698794
ENSG00000282885	AL627171.2	Control vs JetLag - all samples	LimmaVoom	0.465175	-1.32014	0.195796	0.773661
ENSG00000254231	AC103760.1	Control vs JetLag - all samples	LimmaVoom	0.46512	-1.75595	0.199886	0.775795
ENSG00000225558	UBE2D3P2	Control vs JetLag - all samples	LimmaVoom	0.465037	-2.26279	0.0575739	0.643368
ENSG00000151014	NOCT	Control vs JetLag - all samples	LimmaVoom	0.464946	1.01134	0.0561228	0.642309
ENSG00000203688	LINC02487	Control vs JetLag - all samples	LimmaVoom	0.464805	-1.35901	0.254346	0.810774
ENSG00000138622	HCN4	Control vs JetLag - all samples	LimmaVoom	0.464774	-1.94718	0.217423	0.790195
ENSG00000189366	ALG1L	Control vs JetLag - all samples	LimmaVoom	0.464587	0.0710699	0.128203	0.721049
ENSG00000160972	PPP1R16A	Control vs JetLag - all samples	LimmaVoom	0.464395	4.48172	0.0173379	0.532346
ENSG00000177692	DNAJC28	Control vs JetLag - all samples	LimmaVoom	0.464321	1.00346	0.0556552	0.640502
ENSG00000125817	CENPB	Control vs JetLag - all samples	LimmaVoom	0.46432	5.78977	0.00292192	0.391214
ENSG00000228015	AC074338.1	Control vs JetLag - all samples	LimmaVoom	0.464182	-2.01342	0.12159	0.715301
ENSG00000126243	LRFN3	Control vs JetLag - all samples	LimmaVoom	0.464179	0.847216	0.108568	0.704881
ENSG00000043355	ZIC2	Control vs JetLag - all samples	LimmaVoom	0.464129	0.0180481	0.0697873	0.662123
ENSG00000099326	MZF1	Control vs JetLag - all samples	LimmaVoom	0.463886	1.84098	0.130477	0.723502
ENSG00000265927	AC125421.2	Control vs JetLag - all samples	LimmaVoom	0.463832	-1.70915	0.201771	0.776841
ENSG00000110675	ELMOD1	Control vs JetLag - all samples	LimmaVoom	0.463764	0.986046	0.0461811	0.622252
ENSG00000126882	FAM78A	Control vs JetLag - all samples	LimmaVoom	0.463712	2.04944	0.0401035	0.603704
ENSG00000234323	LINC01505	Control vs JetLag - all samples	LimmaVoom	0.463618	0.39803	0.180194	0.766966
ENSG00000187999	HNRNPA1P61	Control vs JetLag - all samples	LimmaVoom	0.463467	-2.41949	0.0665645	0.656934
ENSG00000184599	FAM19A3	Control vs JetLag - all samples	LimmaVoom	0.4634	-1.79874	0.193373	0.771946
ENSG00000178342	KCNG2	Control vs JetLag - all samples	LimmaVoom	0.463355	-1.94031	0.156277	0.743062
ENSG00000101049	SGK2	Control vs JetLag - all samples	LimmaVoom	0.463066	-2.16179	0.0760248	0.670123
ENSG00000106829	TLE4	Control vs JetLag - all samples	LimmaVoom	0.462879	-1.84934	0.196972	0.77453
ENSG00000201574	RNU1-93P	Control vs JetLag - all samples	LimmaVoom	0.462869	-2.47242	0.0168625	0.526713
ENSG00000133063	CHIT1	Control vs JetLag - all samples	LimmaVoom	0.462643	-1.70241	0.234095	0.799052
ENSG00000235481	UBE2R2-AS1	Control vs JetLag - all samples	LimmaVoom	0.46263	-2.51173	0.0192162	0.54447
ENSG00000049283	EPN3	Control vs JetLag - all samples	LimmaVoom	0.462613	0.736307	0.105178	0.702636
ENSG00000279691	AC113410.3	Control vs JetLag - all samples	LimmaVoom	0.462611	0.0593147	0.167883	0.75489
ENSG00000258128	AC079598.2	Control vs JetLag - all samples	LimmaVoom	0.462159	0.838035	0.0632804	0.652745
ENSG00000176749	CDK5R1	Control vs JetLag - all samples	LimmaVoom	0.461905	2.38709	0.0336408	0.589901
ENSG00000282998	AC009975.2	Control vs JetLag - all samples	LimmaVoom	0.461616	-1.35951	0.226605	0.794744
ENSG00000231064	AC234582.1	Control vs JetLag - all samples	LimmaVoom	0.461561	-1.87035	0.192922	0.771634
ENSG00000177453	NIM1K	Control vs JetLag - all samples	LimmaVoom	0.461434	-2.04676	0.104368	0.701736
ENSG00000106066	CPVL	Control vs JetLag - all samples	LimmaVoom	0.461433	-1.02953	0.173112	0.760234
ENSG00000102287	GABRE	Control vs JetLag - all samples	LimmaVoom	0.461307	-1.63106	0.237667	0.801388
ENSG00000243406	MRPS31P5	Control vs JetLag - all samples	LimmaVoom	0.4613	-0.717568	0.259693	0.812781
ENSG00000259100	AL157791.1	Control vs JetLag - all samples	LimmaVoom	0.461033	-2.48104	0.0303144	0.584514
ENSG00000259343	TMC3-AS1	Control vs JetLag - all samples	LimmaVoom	0.461001	0.873673	0.143456	0.735641
ENSG00000167100	SAMD14	Control vs JetLag - all samples	LimmaVoom	0.460969	0.963647	0.183534	0.768663
ENSG00000090565	RAB11FIP3	Control vs JetLag - all samples	LimmaVoom	0.46088	3.72166	0.00465642	0.418145
ENSG00000237605	AL591846.2	Control vs JetLag - all samples	LimmaVoom	0.460561	-1.70526	0.209868	0.782644
ENSG00000226976	COX6A1P2	Control vs JetLag - all samples	LimmaVoom	0.460304	0.58019	0.0965109	0.694384
ENSG00000227542	AC092614.1	Control vs JetLag - all samples	LimmaVoom	0.460256	-1.75067	0.230489	0.797991
ENSG00000008118	CAMK1G	Control vs JetLag - all samples	LimmaVoom	0.460175	-2.36463	0.0949887	0.692991
ENSG00000187608	ISG15	Control vs JetLag - all samples	LimmaVoom	0.460172	6.66538	0.000279156	0.267816
ENSG00000234928	LINC01659	Control vs JetLag - all samples	LimmaVoom	0.460129	-2.42344	0.076584	0.670268
ENSG00000172458	IL17D	Control vs JetLag - all samples	LimmaVoom	0.459988	-0.863796	0.199832	0.775795
ENSG00000089327	FXYD5	Control vs JetLag - all samples	LimmaVoom	0.45995	3.15381	0.0805449	0.675289
ENSG00000255428	AP002008.3	Control vs JetLag - all samples	LimmaVoom	0.459832	-2.49541	0.0824871	0.679725
ENSG00000254473	AL354920.1	Control vs JetLag - all samples	LimmaVoom	0.459754	-0.232313	0.107476	0.703544
ENSG00000147573	TRIM55	Control vs JetLag - all samples	LimmaVoom	0.459603	-1.87036	0.218663	0.790742
ENSG00000268041	AC010616.1	Control vs JetLag - all samples	LimmaVoom	0.459602	-1.86932	0.15551	0.743062
ENSG00000168148	HIST3H3	Control vs JetLag - all samples	LimmaVoom	0.459482	-2.66481	0.0120235	0.493484
ENSG00000175467	SART1	Control vs JetLag - all samples	LimmaVoom	0.459473	4.24605	0.0220537	0.552669
ENSG00000007516	BAIAP3	Control vs JetLag - all samples	LimmaVoom	0.459357	2.33688	0.016596	0.524962
ENSG00000272275	AC092687.3	Control vs JetLag - all samples	LimmaVoom	0.459242	-0.252203	0.152958	0.741954
ENSG00000280351	AC127496.7	Control vs JetLag - all samples	LimmaVoom	0.459116	-1.14212	0.205192	0.77995
ENSG00000242540	AC108025.2	Control vs JetLag - all samples	LimmaVoom	0.458897	-1.09917	0.267836	0.81722
ENSG00000206417	H1FX-AS1	Control vs JetLag - all samples	LimmaVoom	0.458894	-0.377395	0.179715	0.766283
ENSG00000134871	COL4A2	Control vs JetLag - all samples	LimmaVoom	0.458843	6.1869	0.00316994	0.395735
ENSG00000251264	AC098868.1	Control vs JetLag - all samples	LimmaVoom	0.458756	-2.67	0.012085	0.493484
ENSG00000248515	AC024230.1	Control vs JetLag - all samples	LimmaVoom	0.458555	0.00400822	0.131752	0.725072
ENSG00000232316	LINC02518	Control vs JetLag - all samples	LimmaVoom	0.458013	-1.85091	0.195072	0.773407
ENSG00000231646	FSIP2-AS1	Control vs JetLag - all samples	LimmaVoom	0.457766	-1.08736	0.213892	0.786839
ENSG00000166432	ZMAT1	Control vs JetLag - all samples	LimmaVoom	0.457438	-1.65629	0.15384	0.741954
ENSG00000272459	AC139795.3	Control vs JetLag - all samples	LimmaVoom	0.457414	-2.04276	0.190008	0.770338
ENSG00000197826	C4orf22	Control vs JetLag - all samples	LimmaVoom	0.457384	-1.68709	0.190456	0.770553
ENSG00000224957	LINC01266	Control vs JetLag - all samples	LimmaVoom	0.457344	-2.38461	0.0842953	0.682116
ENSG00000229018	PMS2P7	Control vs JetLag - all samples	LimmaVoom	0.457319	-2.0458	0.12018	0.714388
ENSG00000189064	GAGE2A	Control vs JetLag - all samples	LimmaVoom	0.457218	-1.1329	0.160515	0.746484
ENSG00000127418	FGFRL1	Control vs JetLag - all samples	LimmaVoom	0.456984	2.97137	0.0259514	0.567815
ENSG00000249352	LINC02198	Control vs JetLag - all samples	LimmaVoom	0.456957	-2.14999	0.0936553	0.690281
ENSG00000223720	AL109659.1	Control vs JetLag - all samples	LimmaVoom	0.456759	-2.27358	0.0986823	0.697553
ENSG00000101443	WFDC2	Control vs JetLag - all samples	LimmaVoom	0.455958	-1.52758	0.236545	0.800708
ENSG00000103855	CD276	Control vs JetLag - all samples	LimmaVoom	0.455821	6.22813	0.00271663	0.378125
ENSG00000256256	AC019209.1	Control vs JetLag - all samples	LimmaVoom	0.455748	-2.55676	0.00885061	0.460944
ENSG00000229859	PGA3	Control vs JetLag - all samples	LimmaVoom	0.455706	-2.52722	0.0416589	0.609267
ENSG00000226308	AL122058.1	Control vs JetLag - all samples	LimmaVoom	0.455614	-2.18021	0.0568052	0.642623
ENSG00000226029	LINC01772	Control vs JetLag - all samples	LimmaVoom	0.455459	-1.29887	0.258976	0.812781
ENSG00000153165	RGPD3	Control vs JetLag - all samples	LimmaVoom	0.455422	-1.49016	0.280798	0.823148
ENSG00000213701	SETP22	Control vs JetLag - all samples	LimmaVoom	0.455299	-1.94298	0.188285	0.769337
ENSG00000173210	ABLIM3	Control vs JetLag - all samples	LimmaVoom	0.455261	2.36775	0.138894	0.731327
ENSG00000205940	HSP90AB2P	Control vs JetLag - all samples	LimmaVoom	0.455243	-2.3085	0.0632554	0.652734
ENSG00000188763	FZD9	Control vs JetLag - all samples	LimmaVoom	0.455201	0.217501	0.220513	0.791077
ENSG00000282608	ADORA3	Control vs JetLag - all samples	LimmaVoom	0.455115	-2.59561	0.0375731	0.598263
ENSG00000274600	RIMBP3B	Control vs JetLag - all samples	LimmaVoom	0.455021	-2.53116	0.0520077	0.633838
ENSG00000228013	AL162591.1	Control vs JetLag - all samples	LimmaVoom	0.454705	-2.4193	0.074396	0.668775
ENSG00000272269	AL138724.1	Control vs JetLag - all samples	LimmaVoom	0.454597	-1.44511	0.192953	0.771634
ENSG00000051596	THOC3	Control vs JetLag - all samples	LimmaVoom	0.454567	3.96056	0.000734388	0.327866
ENSG00000257859	CASC18	Control vs JetLag - all samples	LimmaVoom	0.45456	-2.14193	0.176292	0.763533
ENSG00000241749	RPSAP52	Control vs JetLag - all samples	LimmaVoom	0.454513	0.410102	0.11431	0.709225
ENSG00000204022	LIPJ	Control vs JetLag - all samples	LimmaVoom	0.454502	0.246142	0.188131	0.769261
ENSG00000278935	AC087386.2	Control vs JetLag - all samples	LimmaVoom	0.454492	-2.54241	0.0317798	0.585878
ENSG00000268834	OR7A1P	Control vs JetLag - all samples	LimmaVoom	0.454042	-2.53263	0.0451915	0.620259
ENSG00000203814	HIST2H2BF	Control vs JetLag - all samples	LimmaVoom	0.453977	-2.07614	0.109416	0.705435
ENSG00000184068	AL021453.1	Control vs JetLag - all samples	LimmaVoom	0.453966	-0.472115	0.186111	0.768663
ENSG00000127586	CHTF18	Control vs JetLag - all samples	LimmaVoom	0.453947	4.3373	0.00324093	0.395735
ENSG00000152503	TRIM36	Control vs JetLag - all samples	LimmaVoom	0.453768	0.836234	0.141775	0.734802
ENSG00000282100	AC091046.3	Control vs JetLag - all samples	LimmaVoom	0.453716	-1.85166	0.153819	0.741954
ENSG00000148344	PTGES	Control vs JetLag - all samples	LimmaVoom	0.453715	-0.548737	0.240854	0.803506
ENSG00000245017	LINC02453	Control vs JetLag - all samples	LimmaVoom	0.453583	-0.680432	0.20444	0.779702
ENSG00000162367	TAL1	Control vs JetLag - all samples	LimmaVoom	0.453494	1.31865	0.118175	0.713844
ENSG00000105327	BBC3	Control vs JetLag - all samples	LimmaVoom	0.453399	4.69408	0.000692396	0.327866
ENSG00000232504	ST3GAL5-AS1	Control vs JetLag - all samples	LimmaVoom	0.453337	-0.942033	0.272109	0.819818
ENSG00000216866	RPS2P55	Control vs JetLag - all samples	LimmaVoom	0.453274	-2.40327	0.0331322	0.589309
ENSG00000065054	SLC9A3R2	Control vs JetLag - all samples	LimmaVoom	0.453234	2.70659	0.0194186	0.54447
ENSG00000111087	GLI1	Control vs JetLag - all samples	LimmaVoom	0.45291	3.21994	0.00231832	0.373982
ENSG00000240766	PLCXD2-AS1	Control vs JetLag - all samples	LimmaVoom	0.45287	-2.74995	0.00386194	0.410331
ENSG00000260774	AC021087.3	Control vs JetLag - all samples	LimmaVoom	0.452862	-0.445277	0.155126	0.742907
ENSG00000167674	HDGFL2	Control vs JetLag - all samples	LimmaVoom	0.452683	4.52555	0.000307122	0.280633
ENSG00000231272	AL122008.1	Control vs JetLag - all samples	LimmaVoom	0.45266	-2.69597	0.0252514	0.562871
ENSG00000183631	PRR32	Control vs JetLag - all samples	LimmaVoom	0.452551	-0.0848161	0.239777	0.802659
ENSG00000108106	UBE2S	Control vs JetLag - all samples	LimmaVoom	0.452429	6.6288	0.00104876	0.355256
ENSG00000188269	OR7A5	Control vs JetLag - all samples	LimmaVoom	0.452361	1.48857	0.0967586	0.694788
ENSG00000011028	MRC2	Control vs JetLag - all samples	LimmaVoom	0.452269	6.60356	0.00139485	0.361136
ENSG00000162366	PDZK1IP1	Control vs JetLag - all samples	LimmaVoom	0.452101	-1.86241	0.226944	0.795208
ENSG00000140859	KIFC3	Control vs JetLag - all samples	LimmaVoom	0.45206	4.94472	0.00176078	0.37003
ENSG00000146192	FGD2	Control vs JetLag - all samples	LimmaVoom	0.451367	-2.32767	0.132254	0.725509
ENSG00000275728	AL049794.2	Control vs JetLag - all samples	LimmaVoom	0.45119	-2.5146	0.0380441	0.599525
ENSG00000137198	GMPR	Control vs JetLag - all samples	LimmaVoom	0.451183	1.08069	0.0967259	0.694788
ENSG00000129968	ABHD17A	Control vs JetLag - all samples	LimmaVoom	0.451084	4.44201	0.00840784	0.456934
ENSG00000157212	PAXIP1	Control vs JetLag - all samples	LimmaVoom	0.451074	1.9502	0.0120974	0.493484
ENSG00000250215	CIR1P2	Control vs JetLag - all samples	LimmaVoom	0.451032	-2.6693	0.0288349	0.580719
ENSG00000163013	FBXO41	Control vs JetLag - all samples	LimmaVoom	0.450918	2.81889	0.0245613	0.561875
ENSG00000279665	AC012100.3	Control vs JetLag - all samples	LimmaVoom	0.450754	-2.65537	0.0362875	0.595993
ENSG00000006638	TBXA2R	Control vs JetLag - all samples	LimmaVoom	0.450753	-1.79147	0.143597	0.735641
ENSG00000177283	FZD8	Control vs JetLag - all samples	LimmaVoom	0.450636	1.88365	0.0320466	0.585878
ENSG00000160161	CILP2	Control vs JetLag - all samples	LimmaVoom	0.450457	-1.67322	0.214995	0.787831
ENSG00000179766	ATP8B5P	Control vs JetLag - all samples	LimmaVoom	0.450394	-2.37377	0.092594	0.689024
ENSG00000236663	FRGCA	Control vs JetLag - all samples	LimmaVoom	0.450371	-1.94159	0.124625	0.717608
ENSG00000261390	MAFTRR	Control vs JetLag - all samples	LimmaVoom	0.450332	-0.830668	0.240438	0.802996
ENSG00000243716	NPIPB5	Control vs JetLag - all samples	LimmaVoom	0.450231	-2.68452	0.0155584	0.519172
ENSG00000250127	LINC02108	Control vs JetLag - all samples	LimmaVoom	0.450166	-2.66688	0.0175323	0.533853
ENSG00000277782	AC068870.2	Control vs JetLag - all samples	LimmaVoom	0.449789	0.670001	0.0916086	0.687394
ENSG00000273870	AL138721.1	Control vs JetLag - all samples	LimmaVoom	0.449761	-2.67545	0.021641	0.552669
ENSG00000163914	RHO	Control vs JetLag - all samples	LimmaVoom	0.449757	-2.72888	0.0136327	0.510936
ENSG00000270116	AP001429.1	Control vs JetLag - all samples	LimmaVoom	0.449502	-0.84374	0.283111	0.823635
ENSG00000237017	AC245052.4	Control vs JetLag - all samples	LimmaVoom	0.449475	-2.14241	0.147397	0.738435
ENSG00000214184	GCC2-AS1	Control vs JetLag - all samples	LimmaVoom	0.449474	-1.02641	0.171433	0.757848
ENSG00000263829	FAM60BP	Control vs JetLag - all samples	LimmaVoom	0.449293	-2.04842	0.116489	0.712111
ENSG00000259727	AC103740.2	Control vs JetLag - all samples	LimmaVoom	0.449222	-1.86754	0.197603	0.775517
ENSG00000265683	SYPL1P2	Control vs JetLag - all samples	LimmaVoom	0.449218	0.539394	0.074853	0.668775
ENSG00000261546	AC135782.3	Control vs JetLag - all samples	LimmaVoom	0.449209	-1.79957	0.242559	0.804568
ENSG00000244274	DBNDD2	Control vs JetLag - all samples	LimmaVoom	0.448916	1.98879	0.0184352	0.539046
ENSG00000179886	TIGD5	Control vs JetLag - all samples	LimmaVoom	0.448758	3.96916	0.0298276	0.584514
ENSG00000182902	SLC25A18	Control vs JetLag - all samples	LimmaVoom	0.448751	0.464876	0.113946	0.708491
ENSG00000259295	CSPG4P12	Control vs JetLag - all samples	LimmaVoom	0.448565	-2.11825	0.199757	0.775795
ENSG00000260917	AL158212.3	Control vs JetLag - all samples	LimmaVoom	0.448441	0.417043	0.124341	0.717608
ENSG00000125912	NCLN	Control vs JetLag - all samples	LimmaVoom	0.448408	5.02471	0.00126825	0.361136
ENSG00000269881	AC004754.1	Control vs JetLag - all samples	LimmaVoom	0.448363	-2.46296	0.0473783	0.625832
ENSG00000171608	PIK3CD	Control vs JetLag - all samples	LimmaVoom	0.448356	2.41219	0.0362109	0.595993
ENSG00000272631	AC067750.1	Control vs JetLag - all samples	LimmaVoom	0.44829	2.27692	0.00599739	0.430933
ENSG00000135723	FHOD1	Control vs JetLag - all samples	LimmaVoom	0.44819	3.96238	0.00206166	0.373334
ENSG00000269696	AC005498.3	Control vs JetLag - all samples	LimmaVoom	0.448025	-1.84228	0.213423	0.786839
ENSG00000167716	WDR81	Control vs JetLag - all samples	LimmaVoom	0.447847	3.69658	0.0172036	0.531971
ENSG00000072080	SPP2	Control vs JetLag - all samples	LimmaVoom	0.447801	-2.48608	0.0632117	0.652734
ENSG00000187513	GJA4	Control vs JetLag - all samples	LimmaVoom	0.447738	-2.43653	0.0447966	0.619361
ENSG00000137273	FOXF2	Control vs JetLag - all samples	LimmaVoom	0.447683	3.92226	0.00338935	0.400589
ENSG00000272701	AC007938.4	Control vs JetLag - all samples	LimmaVoom	0.447598	-2.57843	0.0432822	0.612588
ENSG00000185610	DBX2	Control vs JetLag - all samples	LimmaVoom	0.447462	-2.016	0.178319	0.765762
ENSG00000260625	AC026471.2	Control vs JetLag - all samples	LimmaVoom	0.447454	0.12003	0.164032	0.750737
ENSG00000167513	CDT1	Control vs JetLag - all samples	LimmaVoom	0.447326	3.9525	0.003756	0.409311
ENSG00000232303	DFFBP1	Control vs JetLag - all samples	LimmaVoom	0.44729	-2.45662	0.129104	0.722237
ENSG00000225675	LINC01771	Control vs JetLag - all samples	LimmaVoom	0.447007	-2.01624	0.162417	0.748699
ENSG00000281091	AL606763.1	Control vs JetLag - all samples	LimmaVoom	0.446893	-1.16692	0.200475	0.776033
ENSG00000243224	AC006252.1	Control vs JetLag - all samples	LimmaVoom	0.446853	0.440938	0.1689	0.755878
ENSG00000187753	C9orf153	Control vs JetLag - all samples	LimmaVoom	0.446797	-1.79044	0.214806	0.78757
ENSG00000139318	DUSP6	Control vs JetLag - all samples	LimmaVoom	0.446707	-0.0706468	0.183495	0.768663
ENSG00000271797	AC008494.3	Control vs JetLag - all samples	LimmaVoom	0.446665	-1.14962	0.214674	0.787498
ENSG00000203546	AL139353.1	Control vs JetLag - all samples	LimmaVoom	0.446618	-2.19905	0.107721	0.703793
ENSG00000157578	LCA5L	Control vs JetLag - all samples	LimmaVoom	0.446597	-0.275502	0.16751	0.754795
ENSG00000259358	AC026951.1	Control vs JetLag - all samples	LimmaVoom	0.446565	-2.2397	0.150598	0.740765
ENSG00000121871	SLITRK3	Control vs JetLag - all samples	LimmaVoom	0.446468	-0.269259	0.192833	0.771634
ENSG00000004838	ZMYND10	Control vs JetLag - all samples	LimmaVoom	0.446427	0.614095	0.0694452	0.66167
ENSG00000163806	SPDYA	Control vs JetLag - all samples	LimmaVoom	0.446408	-0.261425	0.19358	0.772079
ENSG00000136295	TTYH3	Control vs JetLag - all samples	LimmaVoom	0.446291	5.53216	0.00184965	0.37003
ENSG00000197465	GYPE	Control vs JetLag - all samples	LimmaVoom	0.446291	-0.24584	0.19556	0.773407
ENSG00000005961	ITGA2B	Control vs JetLag - all samples	LimmaVoom	0.446219	-1.12177	0.199553	0.775795
ENSG00000079277	MKNK1	Control vs JetLag - all samples	LimmaVoom	0.446175	0.977733	0.108197	0.703917
ENSG00000275457	AL117332.1	Control vs JetLag - all samples	LimmaVoom	0.445893	0.664347	0.100243	0.698794
ENSG00000275090	RN7SL296P	Control vs JetLag - all samples	LimmaVoom	0.445766	-2.53466	0.0213081	0.552669
ENSG00000071655	MBD3	Control vs JetLag - all samples	LimmaVoom	0.445717	4.96744	0.010515	0.483657
ENSG00000224649	AF124730.1	Control vs JetLag - all samples	LimmaVoom	0.445636	-2.01186	0.204835	0.77995
ENSG00000130635	COL5A1	Control vs JetLag - all samples	LimmaVoom	0.44562	3.4891	0.00914388	0.464289
ENSG00000280122	AC016168.3	Control vs JetLag - all samples	LimmaVoom	0.445446	-2.55424	0.0248012	0.561875
ENSG00000095303	PTGS1	Control vs JetLag - all samples	LimmaVoom	0.445244	0.440242	0.0783778	0.67224
ENSG00000081052	COL4A4	Control vs JetLag - all samples	LimmaVoom	0.445052	0.381262	0.0844849	0.682116
ENSG00000169951	ZNF764	Control vs JetLag - all samples	LimmaVoom	0.444092	1.50914	0.0449254	0.619652
ENSG00000236626	MTND5P17	Control vs JetLag - all samples	LimmaVoom	0.444034	-2.45986	0.0536756	0.635106
ENSG00000162302	RPS6KA4	Control vs JetLag - all samples	LimmaVoom	0.44398	5.33267	0.00114487	0.361136
ENSG00000147889	CDKN2A	Control vs JetLag - all samples	LimmaVoom	0.443948	-2.65071	0.02416	0.5614
ENSG00000261102	ATP5J2P6	Control vs JetLag - all samples	LimmaVoom	0.443834	-2.59278	0.037166	0.597222
ENSG00000128268	MGAT3	Control vs JetLag - all samples	LimmaVoom	0.443778	4.47433	0.00593869	0.430933
ENSG00000185730	ZNF696	Control vs JetLag - all samples	LimmaVoom	0.443623	3.24059	0.00843015	0.456959
ENSG00000226604	PAPPA-AS2	Control vs JetLag - all samples	LimmaVoom	0.4436	0.476249	0.150467	0.740547
ENSG00000267776	AC006116.10	Control vs JetLag - all samples	LimmaVoom	0.443547	-2.7303	0.00703147	0.440206
ENSG00000225978	HAR1A	Control vs JetLag - all samples	LimmaVoom	0.443451	-0.223505	0.110171	0.706486
ENSG00000149201	CCDC81	Control vs JetLag - all samples	LimmaVoom	0.443345	0.184431	0.224029	0.792526
ENSG00000156925	ZIC3	Control vs JetLag - all samples	LimmaVoom	0.443323	-0.223411	0.126081	0.720205
ENSG00000258926	AL355916.2	Control vs JetLag - all samples	LimmaVoom	0.443278	-2.22379	0.105142	0.702636
ENSG00000267073	AC005256.1	Control vs JetLag - all samples	LimmaVoom	0.443274	-1.0519	0.253877	0.810406
ENSG00000263063	AC024361.2	Control vs JetLag - all samples	LimmaVoom	0.443252	-1.46043	0.241848	0.804568
ENSG00000174807	CD248	Control vs JetLag - all samples	LimmaVoom	0.443243	-2.05359	0.192554	0.771634
ENSG00000137841	PLCB2	Control vs JetLag - all samples	LimmaVoom	0.443213	2.48723	0.00797573	0.448836
ENSG00000220666	RCC2P7	Control vs JetLag - all samples	LimmaVoom	0.443139	-2.51196	0.0655963	0.656308
ENSG00000278986	AC091060.1	Control vs JetLag - all samples	LimmaVoom	0.443053	-1.90488	0.209683	0.782273
ENSG00000130511	SSBP4	Control vs JetLag - all samples	LimmaVoom	0.44296	4.33891	0.0047676	0.420427
ENSG00000225124	RPL23AP36	Control vs JetLag - all samples	LimmaVoom	0.442947	-2.71134	0.0157959	0.519172
ENSG00000114656	KIAA1257	Control vs JetLag - all samples	LimmaVoom	0.442822	-0.110871	0.185073	0.768663
ENSG00000197114	ZGPAT	Control vs JetLag - all samples	LimmaVoom	0.442555	1.8414	0.0362327	0.595993
ENSG00000132164	SLC6A11	Control vs JetLag - all samples	LimmaVoom	0.442496	0.15347	0.145416	0.736246
ENSG00000147576	ADHFE1	Control vs JetLag - all samples	LimmaVoom	0.442496	-0.526196	0.284371	0.824693
ENSG00000149016	TUT1	Control vs JetLag - all samples	LimmaVoom	0.442093	2.27176	0.0723087	0.66723
ENSG00000279879	AC091152.4	Control vs JetLag - all samples	LimmaVoom	0.442069	-0.843467	0.293215	0.829391
ENSG00000176281	OR4K5	Control vs JetLag - all samples	LimmaVoom	0.441997	-2.55853	0.0781046	0.671864
ENSG00000249077	AL158068.1	Control vs JetLag - all samples	LimmaVoom	0.441842	-2.66301	0.0121487	0.49447
ENSG00000257307	AL162311.2	Control vs JetLag - all samples	LimmaVoom	0.441839	-2.46023	0.0241623	0.5614
ENSG00000227034	AL445433.1	Control vs JetLag - all samples	LimmaVoom	0.441781	-2.63386	0.0297301	0.584514
ENSG00000141522	ARHGDIA	Control vs JetLag - all samples	LimmaVoom	0.441695	5.22021	0.0094104	0.471165
ENSG00000272861	AC012360.2	Control vs JetLag - all samples	LimmaVoom	0.441454	-2.39143	0.102655	0.700162
ENSG00000224498	MAPKAPK5P1	Control vs JetLag - all samples	LimmaVoom	0.441452	-2.13622	0.148294	0.738728
ENSG00000202198	7SK	Control vs JetLag - all samples	LimmaVoom	0.441433	-1.40518	0.276933	0.821723
ENSG00000188779	SKOR1	Control vs JetLag - all samples	LimmaVoom	0.441344	0.803706	0.124826	0.717608
ENSG00000275155	AC027348.1	Control vs JetLag - all samples	LimmaVoom	0.441242	-2.62262	0.0603072	0.650259
ENSG00000198547	C20orf203	Control vs JetLag - all samples	LimmaVoom	0.441187	-2.34178	0.0895348	0.685959
ENSG00000125898	FAM110A	Control vs JetLag - all samples	LimmaVoom	0.44104	2.07263	0.00759114	0.443254
ENSG00000230836	LINC01293	Control vs JetLag - all samples	LimmaVoom	0.441037	-2.62982	0.0589122	0.645518
ENSG00000158077	NLRP14	Control vs JetLag - all samples	LimmaVoom	0.440949	-0.283595	0.189449	0.770184
ENSG00000186409	CCDC30	Control vs JetLag - all samples	LimmaVoom	0.440716	1.32394	0.111466	0.707512
ENSG00000121753	ADGRB2	Control vs JetLag - all samples	LimmaVoom	0.440558	4.33757	0.00105983	0.355256
ENSG00000224152	AC009506.1	Control vs JetLag - all samples	LimmaVoom	0.440331	1.33101	0.0386881	0.600557
ENSG00000240951	MTCO2P6	Control vs JetLag - all samples	LimmaVoom	0.440197	-2.733	0.00505776	0.421526
ENSG00000182853	VMO1	Control vs JetLag - all samples	LimmaVoom	0.440162	-1.85013	0.157817	0.744092
ENSG00000113100	CDH9	Control vs JetLag - all samples	LimmaVoom	0.440115	-2.35458	0.0712746	0.665476
ENSG00000279650	AC073912.3	Control vs JetLag - all samples	LimmaVoom	0.439982	-2.49471	0.0235927	0.560309
ENSG00000272693	AC073107.1	Control vs JetLag - all samples	LimmaVoom	0.439723	-2.39361	0.0907397	0.686745
ENSG00000225181	AL121584.1	Control vs JetLag - all samples	LimmaVoom	0.439588	-2.6305	0.0238251	0.561206
ENSG00000075891	PAX2	Control vs JetLag - all samples	LimmaVoom	0.439577	-2.11123	0.142158	0.734897
ENSG00000249876	AC010285.3	Control vs JetLag - all samples	LimmaVoom	0.439331	-2.57533	0.0241068	0.5614
ENSG00000132693	CRP	Control vs JetLag - all samples	LimmaVoom	0.439221	-0.650593	0.278456	0.822225
ENSG00000072310	SREBF1	Control vs JetLag - all samples	LimmaVoom	0.439144	4.76899	0.00485073	0.421248
ENSG00000204291	COL15A1	Control vs JetLag - all samples	LimmaVoom	0.439128	-0.36968	0.193563	0.772079
ENSG00000279243	AP000769.3	Control vs JetLag - all samples	LimmaVoom	0.439089	-1.89199	0.195053	0.773407
ENSG00000266495	AC011731.1	Control vs JetLag - all samples	LimmaVoom	0.43905	-2.65264	0.0288691	0.580719
ENSG00000228079	AC012368.2	Control vs JetLag - all samples	LimmaVoom	0.43886	-2.48982	0.0223307	0.553723
ENSG00000234975	FTH1P2	Control vs JetLag - all samples	LimmaVoom	0.438562	-1.204	0.265786	0.816579
ENSG00000255910	AC024901.1	Control vs JetLag - all samples	LimmaVoom	0.438258	-2.48038	0.0594341	0.647294
ENSG00000168056	LTBP3	Control vs JetLag - all samples	LimmaVoom	0.438076	3.3586	0.0327	0.588036
ENSG00000064300	NGFR	Control vs JetLag - all samples	LimmaVoom	0.437913	3.27039	0.0187487	0.540855
ENSG00000066382	MPPED2	Control vs JetLag - all samples	LimmaVoom	0.437909	0.575062	0.183433	0.768663
ENSG00000186047	DLEU7	Control vs JetLag - all samples	LimmaVoom	0.437726	-2.47701	0.0709468	0.664937
ENSG00000005007	UPF1	Control vs JetLag - all samples	LimmaVoom	0.437724	4.73537	0.00178816	0.37003
ENSG00000236449	AC010894.3	Control vs JetLag - all samples	LimmaVoom	0.437723	1.04392	0.120338	0.714388
ENSG00000159556	ISL2	Control vs JetLag - all samples	LimmaVoom	0.437698	1.59551	0.0253199	0.562871
ENSG00000239268	AC092691.1	Control vs JetLag - all samples	LimmaVoom	0.437647	-2.39143	0.0839298	0.682116
ENSG00000160255	ITGB2	Control vs JetLag - all samples	LimmaVoom	0.437537	3.27009	0.00576088	0.427968
ENSG00000225511	LINC00475	Control vs JetLag - all samples	LimmaVoom	0.437444	0.0379298	0.256831	0.812518
ENSG00000169184	MN1	Control vs JetLag - all samples	LimmaVoom	0.437278	1.52495	0.0926402	0.689024
ENSG00000277130	AC073569.3	Control vs JetLag - all samples	LimmaVoom	0.437013	-0.795739	0.250107	0.809086
ENSG00000128285	MCHR1	Control vs JetLag - all samples	LimmaVoom	0.437007	-0.791722	0.275696	0.821723
ENSG00000248668	OXCT1-AS1	Control vs JetLag - all samples	LimmaVoom	0.436928	0.899915	0.152443	0.741954
ENSG00000068354	TBC1D25	Control vs JetLag - all samples	LimmaVoom	0.436898	3.22924	0.00756053	0.443254
ENSG00000223704	LINC01422	Control vs JetLag - all samples	LimmaVoom	0.436839	-1.0094	0.309873	0.836641
ENSG00000197013	ZNF429	Control vs JetLag - all samples	LimmaVoom	0.436838	-0.35111	0.242243	0.804568
ENSG00000125931	CITED1	Control vs JetLag - all samples	LimmaVoom	0.436805	0.680176	0.174437	0.761094
ENSG00000253558	AC024568.1	Control vs JetLag - all samples	LimmaVoom	0.436755	-1.92588	0.175468	0.761835
ENSG00000159650	UROC1	Control vs JetLag - all samples	LimmaVoom	0.436597	-2.59082	0.0158805	0.519172
ENSG00000140548	ZNF710	Control vs JetLag - all samples	LimmaVoom	0.436452	1.94184	0.0152408	0.519172
ENSG00000152931	PART1	Control vs JetLag - all samples	LimmaVoom	0.436371	-1.44439	0.251607	0.809294
ENSG00000275395	FCGBP	Control vs JetLag - all samples	LimmaVoom	0.436248	-1.076	0.281445	0.823492
ENSG00000106852	LHX6	Control vs JetLag - all samples	LimmaVoom	0.436244	-0.291439	0.253138	0.809678
ENSG00000187135	VSTM2B	Control vs JetLag - all samples	LimmaVoom	0.436225	-2.37755	0.0598479	0.648639
ENSG00000269906	AL606834.2	Control vs JetLag - all samples	LimmaVoom	0.436114	0.236286	0.186201	0.768663
ENSG00000270157	AC004918.3	Control vs JetLag - all samples	LimmaVoom	0.436066	0.0720658	0.157423	0.743444
ENSG00000232445	AC006329.1	Control vs JetLag - all samples	LimmaVoom	0.436063	-2.58614	0.0628559	0.652445
ENSG00000260790	AC092338.2	Control vs JetLag - all samples	LimmaVoom	0.436053	-2.16137	0.194649	0.773138
ENSG00000205356	TECPR1	Control vs JetLag - all samples	LimmaVoom	0.43605	4.30525	0.00977725	0.480958
ENSG00000157637	SLC38A10	Control vs JetLag - all samples	LimmaVoom	0.435942	5.21033	0.00213376	0.373334
ENSG00000256420	OSBPL9P4	Control vs JetLag - all samples	LimmaVoom	0.435836	-2.69773	0.0632921	0.652745
ENSG00000233821	ENOX1-AS1	Control vs JetLag - all samples	LimmaVoom	0.435827	-2.63687	0.0605623	0.65087
ENSG00000242147	AL365356.5	Control vs JetLag - all samples	LimmaVoom	0.435794	-1.0364	0.303537	0.834597
ENSG00000137960	GIPC2	Control vs JetLag - all samples	LimmaVoom	0.435764	-2.17059	0.120292	0.714388
ENSG00000268635	AP003680.1	Control vs JetLag - all samples	LimmaVoom	0.435745	-1.7904	0.230814	0.798109
ENSG00000142330	CAPN10	Control vs JetLag - all samples	LimmaVoom	0.435717	3.80032	0.00449503	0.418145
ENSG00000229816	DDX50P1	Control vs JetLag - all samples	LimmaVoom	0.435679	-0.762146	0.255099	0.811689
ENSG00000267698	AC002116.2	Control vs JetLag - all samples	LimmaVoom	0.435631	-1.65131	0.270055	0.819205
ENSG00000162999	DUSP19	Control vs JetLag - all samples	LimmaVoom	0.435606	2.71239	0.119131	0.714388
ENSG00000237350	CDC42P6	Control vs JetLag - all samples	LimmaVoom	0.435498	-1.4082	0.170336	0.757578
ENSG00000225573	RPL35P5	Control vs JetLag - all samples	LimmaVoom	0.435449	-1.15718	0.249263	0.808318
ENSG00000232648	AC107214.1	Control vs JetLag - all samples	LimmaVoom	0.435448	-2.16706	0.152407	0.741954
ENSG00000167889	MGAT5B	Control vs JetLag - all samples	LimmaVoom	0.435364	1.69713	0.145103	0.736076
ENSG00000165555	NOXRED1	Control vs JetLag - all samples	LimmaVoom	0.435306	-1.07314	0.202644	0.777556
ENSG00000270757	HSPE1-MOB4	Control vs JetLag - all samples	LimmaVoom	0.435181	-2.57509	0.0273022	0.574164
ENSG00000273901	AC012313.9	Control vs JetLag - all samples	LimmaVoom	0.435113	-2.08996	0.286981	0.825747
ENSG00000178209	PLEC	Control vs JetLag - all samples	LimmaVoom	0.435111	5.81035	0.00088565	0.34807
ENSG00000105726	ATP13A1	Control vs JetLag - all samples	LimmaVoom	0.434825	2.47478	0.0340247	0.590034
ENSG00000269693	AC010422.6	Control vs JetLag - all samples	LimmaVoom	0.434814	-0.831752	0.227667	0.795879
ENSG00000270775	AP000436.1	Control vs JetLag - all samples	LimmaVoom	0.43479	-2.54726	0.0393206	0.601731
ENSG00000272858	Z93930.3	Control vs JetLag - all samples	LimmaVoom	0.434624	-1.9266	0.19123	0.77124
ENSG00000234432	AC092171.3	Control vs JetLag - all samples	LimmaVoom	0.434599	1.14314	0.0689809	0.661646
ENSG00000166689	PLEKHA7	Control vs JetLag - all samples	LimmaVoom	0.43458	1.61907	0.0310246	0.585269
ENSG00000271347	AC124312.5	Control vs JetLag - all samples	LimmaVoom	0.434556	-1.75839	0.231869	0.798889
ENSG00000238164	TNFRSF14-AS1	Control vs JetLag - all samples	LimmaVoom	0.434533	-2.19332	0.127782	0.720746
ENSG00000173376	NDNF	Control vs JetLag - all samples	LimmaVoom	0.434529	-2.68896	0.0153059	0.519172
ENSG00000104897	SF3A2	Control vs JetLag - all samples	LimmaVoom	0.434472	2.55724	0.00758277	0.443254
ENSG00000282968	AGGF1P10	Control vs JetLag - all samples	LimmaVoom	0.434312	0.918346	0.136041	0.728647
ENSG00000263718	AC068594.1	Control vs JetLag - all samples	LimmaVoom	0.434192	-2.35729	0.134648	0.72676
ENSG00000167822	OR8J3	Control vs JetLag - all samples	LimmaVoom	0.433929	-2.48222	0.0536125	0.634969
ENSG00000142089	IFITM3	Control vs JetLag - all samples	LimmaVoom	0.433683	5.57381	0.0374975	0.598007
ENSG00000283376	AC011591.2	Control vs JetLag - all samples	LimmaVoom	0.433608	0.881737	0.0386988	0.600557
ENSG00000271755	AL031118.1	Control vs JetLag - all samples	LimmaVoom	0.433559	-1.26492	0.304817	0.834888
ENSG00000260877	AP005233.2	Control vs JetLag - all samples	LimmaVoom	0.433535	-1.96873	0.176454	0.763782
ENSG00000119535	CSF3R	Control vs JetLag - all samples	LimmaVoom	0.433388	-2.38698	0.131039	0.724305
ENSG00000256721	CACNA1C-IT3	Control vs JetLag - all samples	LimmaVoom	0.433363	-2.69532	0.0391912	0.601731
ENSG00000130755	GMFG	Control vs JetLag - all samples	LimmaVoom	0.433203	1.06288	0.103598	0.701736
ENSG00000213853	EMP2	Control vs JetLag - all samples	LimmaVoom	0.433095	4.43736	0.00312805	0.395735
ENSG00000255277	ABCC6P2	Control vs JetLag - all samples	LimmaVoom	0.432959	-1.17042	0.267454	0.817029
ENSG00000118298	CA14	Control vs JetLag - all samples	LimmaVoom	0.432837	-2.33549	0.113483	0.707942
ENSG00000129993	CBFA2T3	Control vs JetLag - all samples	LimmaVoom	0.432819	-2.59125	0.0209794	0.551725
ENSG00000271725	AC103858.1	Control vs JetLag - all samples	LimmaVoom	0.432769	-2.68819	0.0331358	0.589309
ENSG00000274370	AC130371.2	Control vs JetLag - all samples	LimmaVoom	0.432695	-0.903581	0.24364	0.804791
ENSG00000279253	AL121753.2	Control vs JetLag - all samples	LimmaVoom	0.432694	-1.48951	0.155782	0.743062
ENSG00000278863	AC091059.2	Control vs JetLag - all samples	LimmaVoom	0.432587	-2.1615	0.12211	0.715547
ENSG00000116871	MAP7D1	Control vs JetLag - all samples	LimmaVoom	0.432236	3.30992	0.0198987	0.54447
ENSG00000253404	AC034243.1	Control vs JetLag - all samples	LimmaVoom	0.432214	-2.54599	0.0292666	0.581225
ENSG00000279198	AC008894.3	Control vs JetLag - all samples	LimmaVoom	0.432029	-1.92572	0.207364	0.781547
ENSG00000165810	BTNL9	Control vs JetLag - all samples	LimmaVoom	0.431822	2.10739	0.0242942	0.561875
ENSG00000166578	IQCD	Control vs JetLag - all samples	LimmaVoom	0.431797	1.04301	0.145058	0.736076
ENSG00000162337	LRP5	Control vs JetLag - all samples	LimmaVoom	0.43173	3.36427	0.00459804	0.418145
ENSG00000172399	MYOZ2	Control vs JetLag - all samples	LimmaVoom	0.431537	-2.4263	0.150882	0.740927
ENSG00000237522	NONOP2	Control vs JetLag - all samples	LimmaVoom	0.431505	-1.71807	0.228895	0.796508
ENSG00000073670	ADAM11	Control vs JetLag - all samples	LimmaVoom	0.431469	1.40427	0.0269913	0.573924
ENSG00000135638	EMX1	Control vs JetLag - all samples	LimmaVoom	0.431236	0.00178513	0.189805	0.770338
ENSG00000119917	IFIT3	Control vs JetLag - all samples	LimmaVoom	0.430901	7.0007	0.000122855	0.218252
ENSG00000226386	PARD3-AS1	Control vs JetLag - all samples	LimmaVoom	0.430848	-2.03273	0.193919	0.772253
ENSG00000214188	ST7-OT4	Control vs JetLag - all samples	LimmaVoom	0.430841	-1.59952	0.244103	0.80484
ENSG00000254518	AC109635.2	Control vs JetLag - all samples	LimmaVoom	0.430838	-1.63934	0.216673	0.789785
ENSG00000263755	RN7SL498P	Control vs JetLag - all samples	LimmaVoom	0.430826	-2.57055	0.0179981	0.535631
ENSG00000159363	ATP13A2	Control vs JetLag - all samples	LimmaVoom	0.430751	4.27097	0.00138532	0.361136
ENSG00000261002	AC036103.1	Control vs JetLag - all samples	LimmaVoom	0.430472	-2.01776	0.313843	0.838359
ENSG00000268575	AL031282.2	Control vs JetLag - all samples	LimmaVoom	0.430348	0.733539	0.10981	0.706116
ENSG00000269350	AC010463.2	Control vs JetLag - all samples	LimmaVoom	0.430304	-2.80172	0.00715349	0.440206
ENSG00000050820	BCAR1	Control vs JetLag - all samples	LimmaVoom	0.430288	5.31049	0.0050388	0.421526
ENSG00000259522	AL136295.4	Control vs JetLag - all samples	LimmaVoom	0.430238	-2.44074	0.13827	0.730977
ENSG00000226447	AL117337.1	Control vs JetLag - all samples	LimmaVoom	0.430234	-2.54342	0.0267848	0.573131
ENSG00000205771	CATSPER2P1	Control vs JetLag - all samples	LimmaVoom	0.430151	-0.32415	0.192513	0.771634
ENSG00000171680	PLEKHG5	Control vs JetLag - all samples	LimmaVoom	0.430091	2.37742	0.0371868	0.597222
ENSG00000229994	RPL5P4	Control vs JetLag - all samples	LimmaVoom	0.42971	-1.63033	0.221871	0.791432
ENSG00000248610	HSPA8P4	Control vs JetLag - all samples	LimmaVoom	0.429672	-1.88769	0.130713	0.723854
ENSG00000179520	SLC17A8	Control vs JetLag - all samples	LimmaVoom	0.429513	-2.47044	0.0914313	0.687394
ENSG00000178184	PARD6G	Control vs JetLag - all samples	LimmaVoom	0.429505	4.68841	0.025829	0.567353
ENSG00000258359	PCNPP1	Control vs JetLag - all samples	LimmaVoom	0.429488	-1.95408	0.223776	0.792526
ENSG00000222014	RAB6C	Control vs JetLag - all samples	LimmaVoom	0.429308	-1.48704	0.188197	0.769261
ENSG00000169432	SCN9A	Control vs JetLag - all samples	LimmaVoom	0.429126	2.07315	0.180233	0.766966
ENSG00000204393	AL133343.1	Control vs JetLag - all samples	LimmaVoom	0.429095	-2.6591	0.0378144	0.598838
ENSG00000232626	AC099336.1	Control vs JetLag - all samples	LimmaVoom	0.429056	-0.777399	0.225222	0.793098
ENSG00000103653	CSK	Control vs JetLag - all samples	LimmaVoom	0.429014	3.80622	0.000959474	0.355256
ENSG00000196724	ZNF418	Control vs JetLag - all samples	LimmaVoom	0.42897	0.973934	0.145908	0.736986
ENSG00000135824	RGS8	Control vs JetLag - all samples	LimmaVoom	0.42877	-2.60475	0.0183442	0.538106
ENSG00000239877	IGSF11-AS1	Control vs JetLag - all samples	LimmaVoom	0.428758	-2.60101	0.020339	0.547747
ENSG00000188958	UTS2B	Control vs JetLag - all samples	LimmaVoom	0.428725	-1.72467	0.200637	0.776033
ENSG00000161149	TUBA3FP	Control vs JetLag - all samples	LimmaVoom	0.428705	-0.397705	0.0848548	0.682116
ENSG00000161010	MRNIP	Control vs JetLag - all samples	LimmaVoom	0.428525	2.26089	0.015396	0.519172
ENSG00000104946	TBC1D17	Control vs JetLag - all samples	LimmaVoom	0.428406	2.68235	0.00515375	0.423029
ENSG00000074181	NOTCH3	Control vs JetLag - all samples	LimmaVoom	0.428398	2.76706	0.0491194	0.629493
ENSG00000231290	APCDD1L-AS1	Control vs JetLag - all samples	LimmaVoom	0.428356	1.30299	0.129498	0.722511
ENSG00000272827	AL391813.2	Control vs JetLag - all samples	LimmaVoom	0.428159	-2.55797	0.0776882	0.671864
ENSG00000100726	TELO2	Control vs JetLag - all samples	LimmaVoom	0.428014	3.70525	0.00793182	0.448836
ENSG00000242802	AP5Z1	Control vs JetLag - all samples	LimmaVoom	0.427971	5.21217	0.00197792	0.370734
ENSG00000247774	PCED1B-AS1	Control vs JetLag - all samples	LimmaVoom	0.427951	-2.47666	0.0797673	0.67348
ENSG00000111913	RIPOR2	Control vs JetLag - all samples	LimmaVoom	0.427691	2.45547	0.0713971	0.665476
ENSG00000230715	AC018638.2	Control vs JetLag - all samples	LimmaVoom	0.42757	-2.6083	0.0243345	0.561875
ENSG00000160957	RECQL4	Control vs JetLag - all samples	LimmaVoom	0.427505	5.99983	0.00421299	0.418145
ENSG00000263843	AC022211.2	Control vs JetLag - all samples	LimmaVoom	0.42744	2.07956	0.0339705	0.590034
ENSG00000233633	AC093326.1	Control vs JetLag - all samples	LimmaVoom	0.427383	-1.47239	0.247448	0.80637
ENSG00000238243	OR2W3	Control vs JetLag - all samples	LimmaVoom	0.427357	-0.835294	0.272154	0.819837
ENSG00000249713	AC026725.1	Control vs JetLag - all samples	LimmaVoom	0.427264	-2.54247	0.078598	0.672305
ENSG00000133275	CSNK1G2	Control vs JetLag - all samples	LimmaVoom	0.427249	5.18478	0.00539931	0.426231
ENSG00000249244	AC110373.1	Control vs JetLag - all samples	LimmaVoom	0.426969	-2.58975	0.0972313	0.695733
ENSG00000149922	TBX6	Control vs JetLag - all samples	LimmaVoom	0.426808	-0.104175	0.152376	0.741954
ENSG00000153237	CCDC148	Control vs JetLag - all samples	LimmaVoom	0.426781	1.70907	0.169607	0.756827
ENSG00000074416	MGLL	Control vs JetLag - all samples	LimmaVoom	0.426743	3.24208	0.00185563	0.37003
ENSG00000065320	NTN1	Control vs JetLag - all samples	LimmaVoom	0.426662	2.60045	0.0271863	0.573924
ENSG00000204540	PSORS1C1	Control vs JetLag - all samples	LimmaVoom	0.426564	0.581978	0.139505	0.732404
ENSG00000213981	AC007277.1	Control vs JetLag - all samples	LimmaVoom	0.426501	-1.40069	0.270321	0.819392
ENSG00000224080	UBE2FP1	Control vs JetLag - all samples	LimmaVoom	0.426429	-1.99024	0.27561	0.821723
ENSG00000280061	AC011504.1	Control vs JetLag - all samples	LimmaVoom	0.426413	-2.41234	0.0593202	0.646852
ENSG00000166145	SPINT1	Control vs JetLag - all samples	LimmaVoom	0.426395	-1.94198	0.288885	0.826956
ENSG00000180458	AC022148.1	Control vs JetLag - all samples	LimmaVoom	0.426394	-0.915674	0.281138	0.823148
ENSG00000010704	HFE	Control vs JetLag - all samples	LimmaVoom	0.42638	-0.536131	0.260698	0.81299
ENSG00000252965	Y_RNA	Control vs JetLag - all samples	LimmaVoom	0.426239	-2.55848	0.0337255	0.590034
ENSG00000255495	AC145124.1	Control vs JetLag - all samples	LimmaVoom	0.426092	-0.270718	0.158313	0.744566
ENSG00000284657	AL031432.5	Control vs JetLag - all samples	LimmaVoom	0.426082	-2.3969	0.116525	0.712203
ENSG00000056487	PHF21B	Control vs JetLag - all samples	LimmaVoom	0.42604	2.29153	0.0184734	0.539094
ENSG00000248773	AC108727.1	Control vs JetLag - all samples	LimmaVoom	0.426018	-2.31455	0.164687	0.751661
ENSG00000123570	RAB9B	Control vs JetLag - all samples	LimmaVoom	0.425989	1.61858	0.0937285	0.690576
ENSG00000273226	AL391834.2	Control vs JetLag - all samples	LimmaVoom	0.425965	-2.57455	0.0432992	0.612588
ENSG00000205755	CRLF2	Control vs JetLag - all samples	LimmaVoom	0.425891	-1.13173	0.261247	0.81299
ENSG00000235641	LINC00484	Control vs JetLag - all samples	LimmaVoom	0.425887	-1.51372	0.239606	0.802654
ENSG00000151136	BTBD11	Control vs JetLag - all samples	LimmaVoom	0.425823	0.734865	0.192601	0.771634
ENSG00000185761	ADAMTSL5	Control vs JetLag - all samples	LimmaVoom	0.425657	0.275549	0.0999932	0.698794
ENSG00000268750	AC010522.1	Control vs JetLag - all samples	LimmaVoom	0.425595	-2.33268	0.134715	0.72676
ENSG00000137825	ITPKA	Control vs JetLag - all samples	LimmaVoom	0.425573	3.08065	0.00465901	0.418145
ENSG00000229588	AL390115.1	Control vs JetLag - all samples	LimmaVoom	0.425437	-2.51586	0.0551369	0.638925
ENSG00000182759	MAFA	Control vs JetLag - all samples	LimmaVoom	0.425275	1.99314	0.0270357	0.573924
ENSG00000185652	NTF3	Control vs JetLag - all samples	LimmaVoom	0.425254	0.170652	0.148858	0.739655
ENSG00000227160	THEM7P	Control vs JetLag - all samples	LimmaVoom	0.42521	-2.53063	0.0615847	0.651493
ENSG00000239857	GET4	Control vs JetLag - all samples	LimmaVoom	0.425208	1.35091	0.0225584	0.554286
ENSG00000235978	AC018816.1	Control vs JetLag - all samples	LimmaVoom	0.425045	1.8708	0.094909	0.692953
ENSG00000243696	AC006254.1	Control vs JetLag - all samples	LimmaVoom	0.424939	-1.82242	0.284626	0.824693
ENSG00000157856	DRC1	Control vs JetLag - all samples	LimmaVoom	0.424862	-2.64707	0.0554931	0.640257
ENSG00000235449	AC098934.3	Control vs JetLag - all samples	LimmaVoom	0.42486	-2.58879	0.0234647	0.559082
ENSG00000242858	AC020899.1	Control vs JetLag - all samples	LimmaVoom	0.42485	-2.65102	0.0435433	0.612826
ENSG00000205363	C15orf59	Control vs JetLag - all samples	LimmaVoom	0.424819	0.737593	0.112148	0.707512
ENSG00000166016	ABTB2	Control vs JetLag - all samples	LimmaVoom	0.424755	-1.86106	0.17765	0.765006
ENSG00000267080	ASB16-AS1	Control vs JetLag - all samples	LimmaVoom	0.424721	0.90015	0.132334	0.725509
ENSG00000278383	AL031673.1	Control vs JetLag - all samples	LimmaVoom	0.424628	-2.68275	0.0216865	0.552669
ENSG00000065361	ERBB3	Control vs JetLag - all samples	LimmaVoom	0.424598	1.15975	0.180182	0.766966
ENSG00000176236	C10orf111	Control vs JetLag - all samples	LimmaVoom	0.424557	-1.59251	0.237385	0.801374
ENSG00000127472	PLA2G5	Control vs JetLag - all samples	LimmaVoom	0.424488	0.297291	0.197359	0.774923
ENSG00000049249	TNFRSF9	Control vs JetLag - all samples	LimmaVoom	0.424437	0.286248	0.251988	0.809294
ENSG00000182318	ZSCAN22	Control vs JetLag - all samples	LimmaVoom	0.424313	1.42766	0.0512116	0.632146
ENSG00000242622	AC092910.3	Control vs JetLag - all samples	LimmaVoom	0.42428	1.73557	0.0547898	0.638145
ENSG00000128610	FEZF1	Control vs JetLag - all samples	LimmaVoom	0.42423	-1.25206	0.274041	0.820953
ENSG00000170684	ZNF296	Control vs JetLag - all samples	LimmaVoom	0.424188	-2.14514	0.156731	0.743444
ENSG00000105699	LSR	Control vs JetLag - all samples	LimmaVoom	0.424146	4.32374	0.0147214	0.517197
ENSG00000107742	SPOCK2	Control vs JetLag - all samples	LimmaVoom	0.424074	-0.363646	0.268684	0.81823
ENSG00000227179	PGCP1	Control vs JetLag - all samples	LimmaVoom	0.424008	-2.6585	0.0287461	0.580719
ENSG00000187372	PCDHB13	Control vs JetLag - all samples	LimmaVoom	0.42395	0.470306	0.209011	0.781834
ENSG00000231133	HAR1B	Control vs JetLag - all samples	LimmaVoom	0.423907	-2.37002	0.0985135	0.697553
ENSG00000261582	AL121753.1	Control vs JetLag - all samples	LimmaVoom	0.423671	-2.40764	0.121997	0.715547
ENSG00000177169	ULK1	Control vs JetLag - all samples	LimmaVoom	0.42356	2.40691	0.0155391	0.519172
ENSG00000142677	IL22RA1	Control vs JetLag - all samples	LimmaVoom	0.423547	-0.979555	0.254769	0.811355
ENSG00000218996	ARL4AP5	Control vs JetLag - all samples	LimmaVoom	0.423476	-2.0578	0.182446	0.768663
ENSG00000101336	HCK	Control vs JetLag - all samples	LimmaVoom	0.42341	-2.19617	0.146604	0.73801
ENSG00000167281	RBFOX3	Control vs JetLag - all samples	LimmaVoom	0.42327	-0.629376	0.287559	0.825955
ENSG00000173065	FAM222B	Control vs JetLag - all samples	LimmaVoom	0.423194	1.13105	0.0518952	0.633312
ENSG00000234199	LINC01191	Control vs JetLag - all samples	LimmaVoom	0.423121	0.575047	0.1302	0.723321
ENSG00000259075	POC1B-GALNT4	Control vs JetLag - all samples	LimmaVoom	0.423078	-1.55483	0.203587	0.778718
ENSG00000103227	LMF1	Control vs JetLag - all samples	LimmaVoom	0.422986	1.86692	0.063474	0.653221
ENSG00000196549	MME	Control vs JetLag - all samples	LimmaVoom	0.422967	-1.23989	0.211469	0.784756
ENSG00000176485	PLA2G16	Control vs JetLag - all samples	LimmaVoom	0.422823	-2.1428	0.15584	0.743062
ENSG00000230102	LINC02028	Control vs JetLag - all samples	LimmaVoom	0.422728	-1.62489	0.177271	0.764466
ENSG00000178031	ADAMTSL1	Control vs JetLag - all samples	LimmaVoom	0.422639	2.23209	0.00494268	0.421248
ENSG00000256966	AL513165.2	Control vs JetLag - all samples	LimmaVoom	0.422624	-2.4101	0.101419	0.69933
ENSG00000140854	KATNB1	Control vs JetLag - all samples	LimmaVoom	0.422606	4.40117	0.000576404	0.308073
ENSG00000117148	ACTL8	Control vs JetLag - all samples	LimmaVoom	0.422533	-2.41865	0.107166	0.703469
ENSG00000164880	INTS1	Control vs JetLag - all samples	LimmaVoom	0.422508	5.18042	0.00426548	0.418145
ENSG00000271259	AC010201.1	Control vs JetLag - all samples	LimmaVoom	0.422468	-1.52909	0.27868	0.822493
ENSG00000224479	AC104162.1	Control vs JetLag - all samples	LimmaVoom	0.422443	-2.4327	0.0613288	0.651421
ENSG00000151164	RAD9B	Control vs JetLag - all samples	LimmaVoom	0.422237	-0.781008	0.190909	0.77124
ENSG00000213090	AC007256.1	Control vs JetLag - all samples	LimmaVoom	0.422226	-1.22593	0.298464	0.833302
ENSG00000137261	KIAA0319	Control vs JetLag - all samples	LimmaVoom	0.422169	-1.40273	0.298488	0.833302
ENSG00000234807	LINC01135	Control vs JetLag - all samples	LimmaVoom	0.422021	-2.22245	0.102534	0.700162
ENSG00000162430	SELENON	Control vs JetLag - all samples	LimmaVoom	0.421894	2.81995	0.055064	0.638925
ENSG00000242882	RPL5P11	Control vs JetLag - all samples	LimmaVoom	0.421847	-2.62015	0.0824167	0.679725
ENSG00000244521	RN7SL700P	Control vs JetLag - all samples	LimmaVoom	0.421786	-2.60158	0.0292193	0.581225
ENSG00000188004	SNHG28	Control vs JetLag - all samples	LimmaVoom	0.421713	-0.637692	0.250101	0.809086
ENSG00000230487	PSMG3-AS1	Control vs JetLag - all samples	LimmaVoom	0.421655	2.57555	0.0611925	0.651421
ENSG00000228589	SPCS2P4	Control vs JetLag - all samples	LimmaVoom	0.421526	-2.70327	0.0825297	0.679725
ENSG00000175161	CADM2	Control vs JetLag - all samples	LimmaVoom	0.421512	-1.94579	0.159802	0.745836
ENSG00000155918	RAET1L	Control vs JetLag - all samples	LimmaVoom	0.421466	-2.11575	0.195469	0.773407
ENSG00000103257	SLC7A5	Control vs JetLag - all samples	LimmaVoom	0.421429	5.27464	0.00494994	0.421248
ENSG00000183313	OR52L1	Control vs JetLag - all samples	LimmaVoom	0.421421	-2.62766	0.0427008	0.611904
ENSG00000187134	AKR1C1	Control vs JetLag - all samples	LimmaVoom	0.42117	-1.36858	0.240996	0.803542
ENSG00000238227	TMEM250	Control vs JetLag - all samples	LimmaVoom	0.421052	5.01942	0.00127466	0.361136
ENSG00000072163	LIMS2	Control vs JetLag - all samples	LimmaVoom	0.421017	-0.105723	0.145099	0.736076
ENSG00000183196	CHST6	Control vs JetLag - all samples	LimmaVoom	0.420992	1.99704	0.116907	0.712584
ENSG00000256234	AC022509.2	Control vs JetLag - all samples	LimmaVoom	0.420872	-2.50725	0.0572475	0.642628
ENSG00000205682	AC020741.1	Control vs JetLag - all samples	LimmaVoom	0.420844	-2.57756	0.0925247	0.689024
ENSG00000196605	ZNF846	Control vs JetLag - all samples	LimmaVoom	0.420677	1.54099	0.144016	0.735974
ENSG00000158315	RHBDL2	Control vs JetLag - all samples	LimmaVoom	0.420651	-2.32916	0.137737	0.730762
ENSG00000267024	AC008747.1	Control vs JetLag - all samples	LimmaVoom	0.420463	-2.47133	0.0899324	0.686253
ENSG00000249239	AC095059.2	Control vs JetLag - all samples	LimmaVoom	0.420417	-2.55929	0.0635099	0.653332
ENSG00000175463	TBC1D10C	Control vs JetLag - all samples	LimmaVoom	0.420383	4.05569	0.00195865	0.37003
ENSG00000272933	AL391121.1	Control vs JetLag - all samples	LimmaVoom	0.420147	-1.06088	0.255617	0.812114
ENSG00000263366	ABHD17AP5	Control vs JetLag - all samples	LimmaVoom	0.420143	-2.14245	0.0992157	0.698295
ENSG00000142544	CTU1	Control vs JetLag - all samples	LimmaVoom	0.42008	1.58223	0.0839163	0.682116
ENSG00000250584	LINC01511	Control vs JetLag - all samples	LimmaVoom	0.420036	1.63774	0.0179022	0.535631
ENSG00000103355	PRSS33	Control vs JetLag - all samples	LimmaVoom	0.420017	0.909719	0.148765	0.739655
ENSG00000253475	AC103769.1	Control vs JetLag - all samples	LimmaVoom	0.420001	-2.35541	0.0479885	0.626169
ENSG00000276514	uc_338	Control vs JetLag - all samples	LimmaVoom	0.419892	-2.67957	0.0488932	0.628486
ENSG00000175147	TMEM51-AS1	Control vs JetLag - all samples	LimmaVoom	0.419883	-2.11008	0.136215	0.728687
ENSG00000204394	VARS	Control vs JetLag - all samples	LimmaVoom	0.419754	6.01268	0.0135446	0.51093
ENSG00000237639	AC064862.5	Control vs JetLag - all samples	LimmaVoom	0.419671	-2.2177	0.170291	0.75747
ENSG00000253333	AC146944.3	Control vs JetLag - all samples	LimmaVoom	0.419564	-2.60039	0.04976	0.629734
ENSG00000261292	AC110491.1	Control vs JetLag - all samples	LimmaVoom	0.419197	-2.28322	0.105255	0.702664
ENSG00000235387	SPAAR	Control vs JetLag - all samples	LimmaVoom	0.419195	0.864785	0.128691	0.721368
ENSG00000273464	AP000238.1	Control vs JetLag - all samples	LimmaVoom	0.419181	-2.15494	0.184369	0.768663
ENSG00000241120	HMGN1P8	Control vs JetLag - all samples	LimmaVoom	0.419129	-2.24767	0.139507	0.732404
ENSG00000205476	CCDC85C	Control vs JetLag - all samples	LimmaVoom	0.419045	3.57547	0.106604	0.703254
ENSG00000272405	AL365181.3	Control vs JetLag - all samples	LimmaVoom	0.418952	0.865881	0.181992	0.768663
ENSG00000154252	GAL3ST2	Control vs JetLag - all samples	LimmaVoom	0.418937	-2.36976	0.112985	0.707942
ENSG00000042304	C2orf83	Control vs JetLag - all samples	LimmaVoom	0.418935	-2.60248	0.046669	0.622775
ENSG00000274929	AL157813.1	Control vs JetLag - all samples	LimmaVoom	0.418907	-1.10091	0.274551	0.821162
ENSG00000218596	AL162578.1	Control vs JetLag - all samples	LimmaVoom	0.418842	-2.48485	0.0296132	0.583911
ENSG00000231787	AC234782.3	Control vs JetLag - all samples	LimmaVoom	0.418695	-2.77005	0.0096391	0.477384
ENSG00000272821	U62317.3	Control vs JetLag - all samples	LimmaVoom	0.418475	0.335531	0.260303	0.81289
ENSG00000273983	HIST1H3G	Control vs JetLag - all samples	LimmaVoom	0.418369	-2.57604	0.110512	0.707024
ENSG00000278811	LINC00624	Control vs JetLag - all samples	LimmaVoom	0.418291	-2.08297	0.194144	0.77273
ENSG00000188620	HMX3	Control vs JetLag - all samples	LimmaVoom	0.418291	-2.40074	0.11491	0.710153
ENSG00000153443	UBALD1	Control vs JetLag - all samples	LimmaVoom	0.418283	1.33639	0.0580864	0.644493
ENSG00000256982	AC135782.1	Control vs JetLag - all samples	LimmaVoom	0.41828	-0.386142	0.235104	0.799077
ENSG00000188816	HMX2	Control vs JetLag - all samples	LimmaVoom	0.418276	1.10214	0.0769587	0.670421
ENSG00000177380	PPFIA3	Control vs JetLag - all samples	LimmaVoom	0.418172	3.75388	0.000756747	0.327866
ENSG00000213438	YBX2P1	Control vs JetLag - all samples	LimmaVoom	0.418156	-2.58389	0.0398306	0.603508
ENSG00000101986	ABCD1	Control vs JetLag - all samples	LimmaVoom	0.418135	2.26902	0.0611286	0.651421
ENSG00000134461	ANKRD16	Control vs JetLag - all samples	LimmaVoom	0.417936	1.89946	0.0216278	0.552669
ENSG00000234273	AC073071.1	Control vs JetLag - all samples	LimmaVoom	0.417835	-2.5698	0.020555	0.549882
ENSG00000163888	CAMK2N2	Control vs JetLag - all samples	LimmaVoom	0.41771	-0.318861	0.219579	0.791031
ENSG00000258592	AL391152.1	Control vs JetLag - all samples	LimmaVoom	0.417522	0.471769	0.145275	0.736076
ENSG00000116649	SRM	Control vs JetLag - all samples	LimmaVoom	0.417488	3.0761	0.0711328	0.664937
ENSG00000185640	KRT79	Control vs JetLag - all samples	LimmaVoom	0.417446	-2.42003	0.116889	0.712584
ENSG00000141497	ZMYND15	Control vs JetLag - all samples	LimmaVoom	0.41733	-0.219959	0.21711	0.790118
ENSG00000257524	AL157935.2	Control vs JetLag - all samples	LimmaVoom	0.417102	-2.36347	0.165316	0.75181
ENSG00000196611	MMP1	Control vs JetLag - all samples	LimmaVoom	0.416836	-1.69887	0.234749	0.799077
ENSG00000250587	HPRT1P2	Control vs JetLag - all samples	LimmaVoom	0.416778	-2.57429	0.0503341	0.63047
ENSG00000113721	PDGFRB	Control vs JetLag - all samples	LimmaVoom	0.416742	4.57587	0.000458292	0.29387
ENSG00000104835	SARS2	Control vs JetLag - all samples	LimmaVoom	0.416741	2.13732	0.0251812	0.562871
ENSG00000196924	FLNA	Control vs JetLag - all samples	LimmaVoom	0.41665	8.31014	0.0111191	0.483657
ENSG00000272367	AC018754.1	Control vs JetLag - all samples	LimmaVoom	0.416635	-2.07959	0.150605	0.740765
ENSG00000262468	LINC01569	Control vs JetLag - all samples	LimmaVoom	0.416619	-0.517557	0.232581	0.798889
ENSG00000236844	AC069213.3	Control vs JetLag - all samples	LimmaVoom	0.416533	-2.57323	0.0582264	0.644961
ENSG00000167676	PLIN4	Control vs JetLag - all samples	LimmaVoom	0.416519	-2.08142	0.190996	0.77124
ENSG00000280394	AC011471.3	Control vs JetLag - all samples	LimmaVoom	0.416432	-2.61558	0.0529075	0.634969
ENSG00000243016	AC112482.1	Control vs JetLag - all samples	LimmaVoom	0.416423	-2.35628	0.0677285	0.659504
ENSG00000116254	CHD5	Control vs JetLag - all samples	LimmaVoom	0.416387	2.29594	0.0350657	0.59315
ENSG00000103184	SEC14L5	Control vs JetLag - all samples	LimmaVoom	0.4163	-0.327067	0.228092	0.796032
ENSG00000127366	TAS2R5	Control vs JetLag - all samples	LimmaVoom	0.416253	-1.9204	0.175659	0.762147
ENSG00000261534	AL596244.1	Control vs JetLag - all samples	LimmaVoom	0.416167	-2.45594	0.141772	0.734802
ENSG00000100362	PVALB	Control vs JetLag - all samples	LimmaVoom	0.416035	-1.21743	0.258937	0.812781
ENSG00000269289	AC011503.1	Control vs JetLag - all samples	LimmaVoom	0.416008	-2.27432	0.191862	0.771634
ENSG00000273102	AP000569.1	Control vs JetLag - all samples	LimmaVoom	0.415977	-2.19637	0.10955	0.705563
ENSG00000279692	AC110285.7	Control vs JetLag - all samples	LimmaVoom	0.415859	-2.58512	0.031377	0.585269
ENSG00000236996	MLIP-IT1	Control vs JetLag - all samples	LimmaVoom	0.415847	-2.3493	0.0831237	0.68139
ENSG00000231416	AL358472.1	Control vs JetLag - all samples	LimmaVoom	0.415656	-2.48005	0.0611179	0.651421
ENSG00000178038	ALS2CL	Control vs JetLag - all samples	LimmaVoom	0.415623	1.74473	0.178673	0.76577
ENSG00000100767	PAPLN	Control vs JetLag - all samples	LimmaVoom	0.415573	3.65445	0.00810528	0.44949
ENSG00000099624	ATP5D	Control vs JetLag - all samples	LimmaVoom	0.415527	3.98592	0.0107597	0.483657
ENSG00000271020	AC112220.2	Control vs JetLag - all samples	LimmaVoom	0.415475	-0.780297	0.317808	0.841108
ENSG00000183246	RIMBP3C	Control vs JetLag - all samples	LimmaVoom	0.415318	-2.61666	0.101217	0.69933
ENSG00000206567	AC022007.1	Control vs JetLag - all samples	LimmaVoom	0.415287	1.0015	0.190064	0.770338
ENSG00000204632	HLA-G	Control vs JetLag - all samples	LimmaVoom	0.415286	0.693884	0.223703	0.792526
ENSG00000164078	MST1R	Control vs JetLag - all samples	LimmaVoom	0.415271	-2.20007	0.165065	0.75181
ENSG00000204261	PSMB8-AS1	Control vs JetLag - all samples	LimmaVoom	0.415266	1.87293	0.0612579	0.651421
ENSG00000227878	AC114760.1	Control vs JetLag - all samples	LimmaVoom	0.415127	-2.5323	0.0691699	0.661646
ENSG00000269313	MAGIX	Control vs JetLag - all samples	LimmaVoom	0.415023	0.877169	0.115323	0.710786
ENSG00000004399	PLXND1	Control vs JetLag - all samples	LimmaVoom	0.415004	3.90399	0.018155	0.536776
ENSG00000283352	AL021368.4	Control vs JetLag - all samples	LimmaVoom	0.414945	-1.53603	0.250007	0.809081
ENSG00000227014	AC007285.1	Control vs JetLag - all samples	LimmaVoom	0.414922	-2.19742	0.181251	0.76816
ENSG00000229747	AL445687.2	Control vs JetLag - all samples	LimmaVoom	0.414832	-2.64819	0.0156965	0.519172
ENSG00000179097	HTR1F	Control vs JetLag - all samples	LimmaVoom	0.414808	-1.42829	0.253419	0.81008
ENSG00000128713	HOXD11	Control vs JetLag - all samples	LimmaVoom	0.414772	-1.77654	0.240519	0.803049
ENSG00000008128	CDK11A	Control vs JetLag - all samples	LimmaVoom	0.414725	0.645145	0.185959	0.768663
ENSG00000260410	AC040169.2	Control vs JetLag - all samples	LimmaVoom	0.414543	-1.86979	0.27978	0.82276
ENSG00000185495	AC138393.1	Control vs JetLag - all samples	LimmaVoom	0.414532	0.957112	0.26776	0.81722
[truncated: 34,547 more rows]
[truncated: 5 more columns]
