# Supplementary material for: G1/S cell cycle regulators mediate effects of circadian dysregulation on tumor growth and provide targets for timed anticancer treatment
Source: PLoS Biol. 2019 Apr 30;17(4):e3000228. doi: 10.1371/journal.pbio.3000228 (PMC6490878; doi:10.1371/journal.pbio.3000228)
Supplement: S8 Table — RNA-Seq, RNA sequencing; VEGF-VEGFR, vascular endothelial growth factor-vascular endothelial growth factor receptor. (XLSX) [file pbio.3000228.s018.xlsx]

## Sheet: S8 Table (VEGF-VEGFR)
References
Li, Y.L., Zhao, H., and Ren, X.B. (2016). Relationship of VEGF/VEGFR with immune and cancer cells: staggering or forward? Cancer biology & medicine 13, 206-214.
id	geneSymbol	logFC	pvalue	qvalue
ENSG00000128564	VGF	0.835335	0.000473309	0.296567
ENSG00000037280	FLT4	0.571061	0.0240665	0.5614
ENSG00000128052	KDR	0.46928	0.147588	0.738435
ENSG00000173511	VEGFB	0.242642	0.115815	0.711096
ENSG00000165197	VEGFD	0.0986761	0.696051	0.954463
ENSG00000112715	VEGFA	0.0811234	0.263177	0.815103
ENSG00000150630	VEGFC	0.0525356	0.753095	0.964173
ENSG00000102755	FLT1	-0.118353	0.741336	0.961563
